# Supplementary material for: Leaf Trait Networks Based on Global Data: Representing Variation and Adaptation in Plants
Source: Front Plant Sci. 2021 Dec 7;12:710530. doi: 10.3389/fpls.2021.710530 (PMC8688851; doi:10.3389/fpls.2021.710530)
Supplement: Supplementary file 3 [file Table_1.xlsx]

## Sheet: all plants
Species	log LL	log LMA	log Nmass	log Narea	log Pmass	log Parea	log Amass	log Aarea	log Rdmass	log Rdarea
Adenostoma fasciculatum	1.25527	2.454	0.069	0.5458	-0.9323	-0.4783	1.691	1.145
Arbutus menziesii	1.17153	2.188	0.094	0.288	-0.923	-0.735	1.861	1.049
Arctostaphylos tomentosa	1.347	2.145	0.014	0.1706	-0.993527	-0.848527	1.876	1.022
Artemisia californica		1.979
Baccharis pilularis	0.951338	2.031	0.388	0.4139	-0.8241	-0.7931	2.208	1.239
Ceanothus cuneatus	1.16691	2.356	0.255	0.6111	-0.9617	-0.6057	2.002	1.358
Ceanothus oliganthus	1.03663	2.081	0.328	0.4176	-0.826	-0.745	2.173	1.254
Cercocarpus betuloides	1.06868	2.138	0.382	0.5313	-0.6916	-0.5536	2.249	1.386
Clematis lasiantha		1.874
Dirca occidentalis	0.597939	1.754	0.412	0.1612	-0.7608	-1.0068	2.13	0.8899
Eriodictyon californicum	0.957687	2.251	0.222	0.4761	-0.8045	-0.5535	2.017	1.268
Heteromeles arbutifolia	1.35817	2.315	0.137	0.452	-0.8794	-0.5644	1.774	1.089
Holodiscus discolor	0.661392	1.894	0.288	0.1931	-0.7202	-0.8262	2.207	1.101
Lepechinia calycina	0.64453	2	0.259	0.2593	-0.9224	-0.9224	2.098	1.098
Lonicera hispidula		2.032
Lotus scoparius	0.301319	1.984	0.361	0.3184	-0.8034	-0.8194	2.35	1.334
Mimulus aurantiacus	0.876417	2.049	0.063	0.1269	-0.9212	-0.8722	2.089	1.168
Pickeringia montana		2.181
Prunus iIlicifolia	1.21678	2.178	0.311	0.4883	-0.8474	-0.6694	1.805	0.9826
Quercus agrifolia		2.292
Quercus durata		2.322
Rhamnus californica	1.18593	1.869	0.318	0.1867	-0.689	-0.82	2.163	1.032
Rhamnus crocea	1.13349	2.1	0.328	0.4436	-0.871	-0.771	1.995	1.095
Ribes californicum	0.516557	1.967	0.349	0.3105	-0.8753	-0.9083	2.072	1.038
Ribes malvaceum		1.874
Sambucus mexicana	0.624545	1.999	0.404	0.4086	-0.7476	-0.7486	2.28	1.279
Solanum umbelliferum		1.903
Toxicodendron diversiloba	0.615523	1.901	0.296226	0.200257	-0.702421	-0.801421	2.218	1.119
Cheirodendron tryginum		1.95202	0.075547	0.0275716	-1.04576	-1.09373	1.77948	0.731508
Chenopodium oahuense		1.95269	0.559907	0.512593	-0.552842	-0.600156	2.21493	1.16761
Comprosma ochracea		1.89671	0.11059	0.00729924	-1.1549	-1.25819	2.1052	1.00191
Meterosideros polymorpha pb		2.49026	-0.136677	0.353583	-2	-1.50974	1.16024	0.650502
Myoporum sandwicensis		2.16775	0.11059	0.278336	-0.79588	-0.628133	2.00494	1.17269
Myrsine lessertiana		2.19294	-0.0177288	0.17521	-1.39794	-1.205	1.67128	0.864214
Pelea sp		1.81899	0.113943	-0.0670709	-1.52288	-1.70389
Rhus sandwicensis		1.68296	0.146128	-0.170911	-1.09691	-1.41395	2.5332	1.21617
Rubus hawaiiensis		1.56366	0.469822	0.0334844	-0.657577	-1.09391
Sophora chrysophylla		2.06018	0.460898	0.521079	-0.823909	-0.763727	1.82856	0.888741
Styphelia tameiameiae		2.31301	-0.0861861	0.22682	-2	-1.68699
Vaccinium chalicinum		1.72774	0.298853	0.0265936	-0.657577	-0.929837	1.98381	0.711554
Vaccinium reticulatum		2.22863	-0.05061	0.178023	-2	-1.77137
Carex kauaiensis		2.17509	-0.0132283	0.161865	-1.30103	-1.12594
Dodonaea viscosa		2.16134	0.146128	0.307468	-0.853872	-0.692532
Dubautia scabra		1.82472	-0.091515	-0.266795	-1.52288	-1.69816
Meterosideros polymorpha pb		2.2898	-0.0655015	0.224296	-1.39794	-1.10814	1.69198	0.981773
Nephrolepsis sp		2.18889	0.0374265	0.226321	-0.886057	-0.697162	0.973072	0.161967
Dicranopteris linearis		1.92354	0.0374265	-0.0390319	-1.39794	-1.4744
Heteropogon contortus		1.65529	0.071882	-0.272825	-0.958607	-1.30331
Meterosideros polymorpha gl		2.15181	-0.0655015	0.0863093	-1.30103	-1.14922
Meterosideros polymorpha pb		2.24803	-0.0604807	0.187548	-1.22185	-0.97382	1.79301	1.04104
Myrsine sandwicensis		1.66322	0.0211893	-0.315591	-1.30103	-1.63781
Nephrolepsis sp		1.67983	0.045323	-0.274844	-0.958607	-1.27877
Pipturus albidus		1.79161	0.20412	-0.00426762	-1.09691	-1.3053	2.35628	1.14789
Psychotria sp		1.846	0.117271	-0.0367264	-1.09691	-1.25091	1.44559	0.291591
Brussaisia arguta		1.86299	0.127105	-0.00990098	-1	-1.13701	1.65657	0.519566
Cibotium glaucum		1.77859	0.220108	-0.00130615	-0.958607	-1.18002
Clermontia montes-loa		1.509	0.454845	-0.0361524	-0.886057	-1.37705	1.67313	0.182129
Freycinetia arborea		1.78479	0.281033	0.0658189	-1	-1.21521	1.58794	0.372728
Ilex anomala		1.9828	0.0934217	0.0762213	-1.39794	-1.41514
Meterosideros polymorpha gl		2.03863	0.045323	0.0839494	-1.1549	-1.11628	1.47725	0.515874
Meterosideros polymorpha pb		2.30803	-0.113509	0.194526	-1.69897	-1.39094	1.27403	0.582063
Peperomia sp		1.57104	0.338456	-0.090504	-0.920819	-1.34978
Comprosma ernodeoides		1.90504	-0.00436481	-0.0993248	-1.22185	-1.31681
Comprosma ochracea		1.60121	0.243038	-0.155752	-1.1549	-1.55369	1.50938	0.11059
Dicranopteris linearis		2.04187	-0.0177288	0.0241376	-1.30103	-1.25916
Hedyotis centranthoides		2.09093	0.103804	0.194729	-1.39794	-1.30701	1.48078	0.571709
Machaerina mariscoides		2.35047	-0.161151	0.18932	-1.69897	-1.3485
Meterosideros polymorpha gl		2.19729	-0.107905	0.0893893	-1.39794	-1.20065	1.4588	0.656098
Meterosideros polymorpha pb		2.56004	-0.229148	0.330888	-1.69897	-1.13893	1.26717	0.793092
Betula papyrifera		1.99564	0.402313	0.39794			2.29003	1.28556
Prunus serotina		1.74819	0.427908	0.176091			2.51851	1.26717
Fraxinus americana		1.96377	0.358449	0.322219			2	0.963788
Quercus rubra		2.04139	0.405773	0.447158			2.33041	1.37107
Quercus alba		2.00436	0.527114	0.531479			2.35793	1.36173
Castanea dentata		1.76344	0.412662	0.176091			2.33646	1.10037
Ulmus americana		1.8129	0.301052	0.113943			2.29667	1.11059
Acer rubrum		2.02118	0.234087	0.255273			2.08991	1.11059
Acer saccharum		2.0086	0.221857	0.230449			1.83251	0.838849
Acer pensylvanicum		1.77086	0.405244	0.176091			2.22531	0.995635
Acalypha skutchii		1.41347	0.412124	-0.174409	-0.672233	-1.25877
Aegiphila costaricensis		1.63438	0.190892	-0.174727	-0.673562	-1.03918
Allophylus camptostachys		2.03165	0.0526939	0.0843447	-0.892112	-0.860461
Amphitecna tuxtlensis		1.93178	0.15412	0.0858972	-0.953895	-1.02212
Astrocaryum mexicanum		1.87364	0.222456	0.0960995	-0.79833	-0.924687
Bactris trichophylla		1.73884	0.186956	-0.0742016	-0.968592	-1.22975
Brosimum alicastrum		1.80315	0.328787	0.131934	-0.885056	-1.08191
Bursera simaruba		1.92905	0.179552	0.108597	-0.997402	-1.06836
Capparis baducca		1.74861	0.213252	-0.0381385	-0.998699	-1.25009
Casearia sylvestris		1.79817			-1.07391	-1.27575
Cecropia obtusifolia		1.89416	0.343999	0.238161	-0.914397	-1.02024
Chamaedorea alternans		1.6205	0.0802656	-0.299235	-0.850012	-1.22951
Chamaedorea pinnatifrons		1.61203	0.246745	-0.14123	-0.684135	-1.07211
Clarisia biflora		2.03194	0.322219	0.354156	-0.94424	-0.912303
Coccoloba hondurensis		2.0159			-1.03152	-1.01561
Cordia megalantha		1.93354	0.329398	0.262935	-0.863755	-0.930218
Croton schiedeanus		1.81772	0.282169	0.0998861	-0.813892	-0.996174
Cupania dentata		2.06072	0.17667	0.237392	-1.01592	-0.9552
Cymbopetalum baillonii		2.04286	0.119256	0.162113	-0.677781	-0.634924
Cynometra retusa		2.10574	0.071882	0.177623	-1.02641	-0.920669
Dendropanax arboreus		1.9713	-0.047692	-0.0763886	-0.85855	-0.887247
Dialium guianense		1.92058	0.227372	0.147948	-0.930887	-1.01031
Dussia mexicana		1.91561	0.199755	0.11537	-0.874031	-0.958416
Erythrina folkersii		1.68629	0.443732	0.130023	-0.820448	-1.13416
Faramea occidentalis		1.93988	0.091667	0.0315466	-1.08302	-1.14314
Ficus tecolutensis		2.12046			-1.07109	-0.950636
Ficus yoponensis		2.01927	0.236789	0.25606	-0.899285	-0.880014
Guamia LT sp1		1.65701	0.24005	-0.102939	-0.910978	-1.25397
Guarea glabra		2.06277	0.243038	0.305808	-0.976953	-0.914184
Guarea grandifolia		2.0037	0.203577	0.207282	-0.743162	-0.739457
Hampea nutricia		1.78634	0.323458	0.109796	-0.710077	-0.92374
Heliocarpus appendiculatus		1.71413	0.325516	0.0396503	-0.771985	-1.05785
Inga quaternata		1.96643			-1.01233	-1.04591
Lonchocarpus guatemalensis		1.98833	0.393751	0.382081	-0.950201	-0.961871
Lunania mexicana		1.74417	0.175802	-0.0800267	-0.808549	-1.06438
Mortoniodendron guatemalense		1.99944	0.180126	0.179568	-1.06349	-1.06404
Myriocarpa longipes		1.73318	0.160168	-0.106651	-0.939302	-1.20612
Nectandra ambigens		2.13641	0.227887	0.364301	-0.98464	-0.848226
Omphalea oleifera		1.84526	0.403292	0.24855	-0.635918	-0.79066
Oreopanax obtusifolius		2.12375			-1.11323	-0.989475
Orthion oblanceolatum		1.84121	0.20167	0.0428802	-0.744727	-0.903518
Piper amalago		1.81664	0.327359	0.143998	-0.852169	-1.03553
Piper auritum		1.57231	0.507991	0.0802981	-0.66374	-1.09143
Piper hispidum		1.81113	0.362294	0.173421	-0.754734	-0.943608
Pleuranthodendron lindenii		1.99618	0.143015	0.139198	-0.913284	-0.917101
Poulsenia armata		2.07417	0.222716	0.296885	-0.695402	-0.621233
Pouteria durlandii		2.11373	0.200577	0.314309	-1.1577	-1.04397
Pouteria rhynchocarpa		1.96225	0.0285713	-0.00917439	-1.14905	-1.18679
Pseudolmedia oxyphyllaria		1.93587	0.0153598	-0.0487715	-1.16463	-1.22876
Psychotria chiapensis		1.7308	0.25261	-0.0165867	-0.984221	-1.25342
Psychotria faxlucens		1.74284	0.139879	-0.117285	-1.18376	-1.44092
Psychotria flava		2.04294	0.0378248	0.0807661	-1.16021	-1.11727
Psychotria simiarum		1.62455	0.206016	-0.169438	-1.15708	-1.53253
Pterocarpus rohrii		1.983	0.272306	0.255303	-0.761452	-0.778455
Quararibea yunckeri		1.77103	0.128722	-0.100244	-0.794525	-1.02349
Garcinia intermedia		2.1383	-0.122629	0.0156702	-1.10485	-0.966555
Robinsonella mirandae		1.77855	0.29048	0.0690335	-0.742802	-0.964248
Salacia megistophylla		2.18656			-0.913996	-0.727438
Spondias radlkoferi		1.86012	0.151676	0.0117953	-0.94962	-1.0895
Stemmadenia donnell-smithii		1.7252	0.350829	0.0760321	-0.92109	-1.19589
Trema micrantha		1.75927	0.360404	0.119676	-0.820592	-1.06132
Trichilia martiana		1.78506	0.33646	0.12152	-0.752518	-0.967458
Trichospermum mexicanum		1.98105	0.256718	0.237766	-0.956245	-0.975196
Trophis mexicana		1.80643	0.2266	0.033034	-0.942905	-1.13647
Turpinia occidentalis		1.90835	0.0484418	-0.0432046	-1.12148	-1.21312
Urera caracasana		1.75509	0.452247	0.207339	-0.678091	-0.922999
Urera elata		1.60214	0.136721	-0.261143	-0.985479	-1.38334
Vatairea lundellii		1.93218	0.191451	0.123632	-1.12004	-1.18786
Vochysia guatemalensis		2.05102	0.0253059	0.076323	-1.12755	-1.07654
Zanthoxylum kellermanii		1.81726	0.318689	0.135949	-0.657577	-0.840317
Quercus falcata	0.915066	2.12385	0.167317	0.291172			2.08276	1.21543
Quercus hemispherica	0.961171	2.13415	0.0827854	0.216932			1.97376	1.10116
Quercus incana	0.752655	2.03291	-0.0222764	0.010638			2.13879	1.15806
Quercus laurifolia	0.880738	2.10257	0.120574	0.223147			2.0234	1.13494
Quercus laevis	0.933767	2.03678	0.184691	0.22147			2.0971	1.12506
Quercus myrtifolia	1.09116	2.10461	0.00860017	0.113212			1.74328	0.931712
Quercus nigra	0.935428	2.11014	0.11059	0.220734			2.06158	1.1337
Quercus shumardii	0.918527	1.99415	0.225309	0.219457			2.18483	1.17898
Quercus pumila	0.837273	2.08113	0.00432137	0.0854526			2.04202	1.17655
Quercus stellata	0.897338	2.15193	0.238046	0.38998			2.08776	1.23742
Quercus margaretta	0.878854	2.04499	0.20412	0.249106			2.18392	1.24125
Quercus michauxii	0.915066	2.20738	-0.05061	0.156768			2.08106	1.2757
Quercus austrina	0.911578	2.05956	0.287802	0.347365			2.13341	1.16882
Quercus chapmanii	0.943638	2.06091	0.143015	0.203925			1.87804	0.951289
Quercus geminata	1.04347	2.35493	-0.0604807	0.294453			1.94732	1.31549
Quercus minima	0.83519	2.01115	0.25042	0.26157			2.10047	1.1121
Quercus virginiana	1.00989	2.17091	0.120574	0.291484			2.20236	1.35499
Arbutus andrachne	1.10037	1.65758
Arbutus unedo	1.17898	1.65365
Quercus coccifera	1.13988	1.66555
Pistacia lentiscus	1.05308	1.65561
Ceratonia siliqua	1.37291	1.6925
Myrtus communis	1.35218	1.86012
Olea europaea	1.36922	1.64016
Phillyrea media		1.767
Quercus ilex		1.90309
Laurus nobilis		1.91009
Nerium oleander		1.69037
Dacrydium beccarii			-0.05061		-1.24413
Eugenia caudata			-0.187087		-1.3279
Eugenia stapfiana			-0.0655015		-1.09151
Eurycoma longifolia					-0.89279
Ficus deltoidea			0.120574		-1.74473
Podocarpus neriifolius			-0.161151		-1.26761
Spondias radlkoferi	0.672098		0.423246
Annona spraguei	0.591065		0.342423
Desmopsis panamensis			0.344392
Guatteria dumentorum	1.32222		0.371068
Aspidosperma megalocarpon	1.4624		0.11059
Jacaranda copaia	0.845098		0.369216
Tabebuia rosea	0.90309		0.369216
Ochroma pyramidale			0.348305
Quararibea asterolepsis	1.06819		0.390935
Cordia alliodora	0.929419		0.491362
Protium tenuifolium	1.27875		0.232996
Tetragastris panamensis	1.36173		0.193125
Trattinickia aspera	0.838849		0.348305
Prioria copaifera	1.4624		0.332438
Swartzia simplex	1.68124		0.4133
Tachigali versicolor	1.36173		0.354108
Hirtella triandra	1.10037		0.257679
Alchornea costaricense	0.724276		0.365488
Croton bilbergianus			0.432969
Hyeronima alcheornoides	0.819544		0.385606
Sapium aucuparium	0.724276		0.4843
Casearia arborea	0.944483		0.450249
Zuelania guidonia	0.851258		0.298853
Calophyllum longifolium	1.54407		0.0681859
Miconia argentea	0.94939		0.222716
Guarea glabra	1.47712		0.491362
Guarea multiflora	1.53148		0.380211
Trichilia cipo	1.50515		0.313867
Cecropia insignis	0.672098		0.318063
Cecropia obtusifolia	0.60206		0.469822
Poulsenia armata	1.44716		0.20412
Virola sebifera	1.38021		0.432969
Alseis blackiana	1.0086		0.472756
Faramea occidentalis			0.206826
Macrocnemum glabrescens	0.963788		0.371068
Zanthoxylum ekmanii	0.672098		0.428135
Zanthoxylum panamense	0.875061		0.450249
Cupania rufescens	1.32222		0.271842
Cupania sylvatica	1.47712		0.409933
Chrysophyllum argenteum	0.934498		0.255273
Pouteria reticulata	1.43136		0.465383
Simarouba amara	1.03743		0.372912
Apeiba aspera	0.770852		0.340444
Apeiba tibourbou	0.591065		0.421604
Luehea seemannii	0.690196		0.418301
Trema micrantha	0.812913		0.460898
Acer platanoides		1.75716	0.371683	0.128846	-0.784274	-1.02711
Acer pseudoplatanus		1.87583	0.4537	0.329533	-0.752231	-0.876399
Aesculus hippocastanum		1.86328	0.372145	0.235422	-0.80387	-0.940592
Alnus glutinosa		1.83594	0.548696	0.384637	-0.68473	-0.848789
Arbutus unedo		1.9652	0.362357	0.327555	-0.717453	-0.752255
Berberis vulgaris		1.88197	0.361098	0.243068	-0.908333	-1.02636
Betula pendula		1.86468	0.439946	0.304626	-0.796182	-0.931502
Buddleja davidii		1.90913	0.296665	0.205794	-0.630413	-0.721284
Buxus sempervirens		2.04423	0.320492	0.364719	-0.997114	-0.952887
Calluna vulgaris		1.78448	0.169282	-0.0462401	-1.01472	-1.23025
Castanea sativa		1.87597	0.375968	0.251937	-0.845677	-0.969709
Cornus sanguinea		1.79259	0.327359	0.119953	-0.81342	-1.02083
Corylus avellana		1.83201	0.390273	0.222283	-0.765314	-0.933304
Crataegus monogyna		1.93854	0.253055	0.1916	-0.895769	-0.957225
Cytisus scoparius		1.79048	0.465631	0.25611	-0.933364	-1.14288
Daphne mezereum		1.64513	0.402548	0.0476802	-0.517126	-0.871994
Dryas octopetala		1.80989	0.284807	0.0947001	-0.379864	-0.56997
Empetrum nigrum		1.99546	0.123307	0.118769	-0.968592	-0.973129
Erica cinera		1.94755	0.151778	0.0993239	-1.04576	-1.09821
Euonymus europaeus		1.81139	0.388575	0.199962	-0.719346	-0.907958
Fagus sylvatica		1.91045	0.377792	0.288238	-0.865133	-0.954686
Frangula alnus		1.67539	0.454845	0.130233	-0.760284	-1.0849
Fraxinus excelsior		1.89319	0.410215	0.303403	-0.738638	-0.84545
Hebe x franciscana		1.93826	0.265604	0.203865	-0.688953	-0.750692
Hedera helix		1.86398	0.143709	0.00768568	-0.775697	-0.91172
Helianthemum nummularium		1.88125	0.35336	0.234611	-0.65083	-0.76958
Hippophae rhamnoides		1.90416	0.48335	0.387514	-0.825843	-0.921679
Ilex aquifolium		2.11279	0.205926	0.318719	-0.891285	-0.778492
Juglans regia		1.83545	0.341105	0.176555	-0.642065	-0.806614
Laburnum anagyroides		1.749	0.53233	0.281329	-0.746608	-0.997609
Larix decidua		2.03795	0.352825	0.390776	-0.765314	-0.727363
Ligustrum vulgare		2.00037	0.19774	0.19811	-0.971971	-0.971601
Lonicera periclymenum		1.84837	0.353788	0.202154	-0.758205	-0.909839
Malus sylvestris		1.9291	0.337126	0.266231	-0.845677	-0.916573
Picea sitchensis		2.18779	0.115611	0.303396	-0.917215	-0.729429
Pinus sylvestris		2.14615	0.223582	0.369737	-0.709965	-0.56381
Prunus laurocerasus		2.07753	0.208173	0.285698	-0.748362	-0.670836
Prunus lusitanica		2.15313	0.0673809	0.220508	-1.01622	-0.863096
Prunus spinosa		1.84204	0.48192	0.323965	-0.672301	-0.830256
Quercus cerris		2.00246	0.437222	0.439683	-0.79588	-0.793419
Quercus ilex		2.20401	0.370143	0.574153	-0.747147	-0.543136
Quercus petraea		1.86904	0.409651	0.278695	-0.849755	-0.980711
Quercus robur		1.87984	0.457882	0.337721	-0.77083	-0.890991
Quercus rubra		1.75861	0.354749	0.11336	-0.816256	-1.05764
Rhamnus cathartica		1.7379	0.480247	0.218148	-0.758205	-1.0203
Rhododendron ponticum		2.06976	0.0144505	0.0842071	-0.9914	-0.921643
Ribes nigrum		1.82093	0.265996	0.0869247	-0.750394	-0.929466
Ribes uva-crispa		1.78304	0.349844	0.132889	-0.737945	-0.9549
Robinia pseudoacacia		1.69618	0.472756	0.168941	-0.810603	-1.11442
Rosa arvensis		1.65225	0.380814	0.0330678	-0.659997	-1.00774
Rubus fruticosus		1.80599	0.400922	0.206907	-0.734265	-0.92828
Salix caprea		1.84189	0.431721	0.273611	-0.679854	-0.837964
Sambucus nigra		1.71584	0.521792	0.23763	-0.61365	-0.897811
Solanum dulcamara		1.42672	0.583577	0.0102969	-0.515084	-1.08836
Sorbus aucuparia		1.8566	0.402548	0.259147	-0.736167	-0.879568
Taxus baccata		2.07416	0.37759	0.451754	-0.669925	-0.59576
Thymus polytrichus		1.79572	0.211521	0.00724167	-0.738341	-0.94262
Ulex europaeus		1.95147	0.503791	0.455258	-0.591195	-0.639728
Ulex gallii		2.13944	0.354108	0.493546	-0.79138	-0.651942
Ulmus glabra		1.87938	0.33912	0.218499	-0.747147	-0.867768
Vaccinium myrtillus		1.73928	0.232573	-0.0281506	-1.00877	-1.2695
Vaccinium oxycoccos		1.99942	0.185637	0.185052	-1.04415	-1.04474
Vaccinium vitis-idaea		2.14415	0.0501863	0.194336	-1.01547	-0.871323
Viburnum opulus		1.80119	0.379306	0.180498	-0.794074	-0.992882
Viburnum tinus		2.07004	0.0743287	0.14437	-0.950782	-0.880741
Amelanchier alnifolia		2.02826	0.260071	0.288332	-0.802341	-0.774081	2.18865	1.22011
Artemisia tridentata		2.22915	0.156246	0.393355	-0.587893	-0.350216	1.64836	0.872156
Juniperus osteosperma		2.81248	-0.121478	0.691001	-0.957609	-0.14513	0.681241	0.491362
Pinus jeffreyi		2.51985	0.0326188	0.552468	-0.968729	-0.44888	1.50515	1.02531
Pinus monophylla		2.8729	-0.047692	0.825203	-0.926995	-0.0541002	0.954243	0.826075
Pinus ponderosa		2.49826	-0.0150229	0.485443	-1.01282	-0.509911	1.35507	0.863323
Purshia tridentata			0.374015		-0.771866
Lyonia lucida	1.25527	2.23603	-0.154902	0.0811312	-1.46374	-1.2277	1.68305	0.892095
Cyrilla racemiflora	1.25527	2.01284	0.100371	0.113208	-1.25864	-1.2458	2.03463	1.04139
Leucothoe racemosa	0.812913	1.94841	-0.00877392	-0.060361	-1.31873	-1.37031	1.90363	0.845098
Itea virginica	0.812913	1.85248	0.049218	-0.098302	-1.17662	-1.32414	1.95665	0.799341
Clethra alnifolia	0.812913	1.93197	0.100371	0.0323367	-1.1706	-1.23864	2.10755	0.919078
Achillea erba	0.361986	1.65322	0.664642	0.317859			2.56067	1.21484
Arabis alpina		1.57978	0.468347	0.0433583
Arabis caerulea		1.67761	0.50515	0.175258
Artemisia genipi		1.62325	0.474216	0.0892797
Campanula barbata		1.72099	0.356026	0.0815075
Cerastium uniflorum		1.49958	0.417472	-0.109822
Doronicum clusii	0.249282	1.68842	0.606381	0.294797			2.63639	1.32428
Erigeron uniflorus	0.408983	1.67942	0.519171	0.194459			2.67366	1.35218
Gentiana bavarica		1.76938	0.209515	0.0037448
Gentiana kochiana		1.82347	0.133539	-0.00954792
Geum montanum	0.323068	1.84907	0.392697	0.243308			2.32883	1.17319
Geum reptans	0.47593	1.85062	0.4133	0.253768			2.28904	1.13672
Leontodon hispidus		1.69897	0.501059	0.169965
Leucanthemopsis alpina	0.419978	1.79588	0.372912	0.174649			2.24565	1.04139
Ligusticum mutellina	0.403379	1.89984	0.558709	0.458545			2.47886	1.3784
Linaria alpina		1.60206	0.376577	0.0521031
Luzula alpino-pilosa	0.280316	1.83251	0.474216	0.306722			2.33442	1.16732
Oxyria digyna	0.19813	1.40653	0.658011	0.063178			2.80967	1.21484
Pedicularis asplenifolius	0.302218	1.7221	0.449478	0.207114			2.49621	1.30535
Poa laxa		1.60206	0.635484	0.233404
Polygonum viviparum	0.129672	1.84621	0.592732	0.43504			2.46725	1.30535
Potentilla aurea		1.67761	0.390935	0.0670318
Potentilla crantzii	0.380211	1.78246	0.515874	0.298337			2.4318	1.21484
Potentilla frigida		1.72428	0.39794	0.118584
Primula glutinosa	0.397702	1.86169	0.428135	0.234194			2.2204	1.08991
Ranunculus glacialis	0.491362	1.78906	0.528595	0.322807			2.47886	1.2878
Senecio incanus		1.82347	0.30963	0.137612
Sibbaldia procumbens		1.76938	0.271842	0.0426444
Taraxacum alpinum	0.336432	1.5623	0.468347	0.0306443			2.46344	1.02531
Veronica alpestris		1.5682	0.363612	-0.0753874
Veronica bellidioides		2	0.075547	0.0807834
Achillea millefolium	0.140138	1.71927	0.503791	0.220606			2.5391	1.25285
Alchemilla verticillata		1.43136	0.462398	-0.0981114
Arabis hirsuta		1.69897	0.30103	-0.00421129
Caltha palustris	0.408983	1.51055
Campanula glomerata		1.5682	0.431364	-0.00136801
Carum carvi	0.302218	1.57864	0.544068	0.122711			2.70115	1.27875
Cerastium arvense		2	0.544068	0.544068
Chrysanthemum leucanthemum	0.336432	1.71842	0.452553	0.166044			2.64589	1.35793
Erigeron acre		1.74819	0.322219	0.0833037
Geum rivale	0.456408	1.72263	0.385606	0.105654			2.37572	1.09691
Leontodon hispidus		1.63849	0.30103	-0.0573398
Lychnis flos-jovis		1.65321	0.146128	-0.186259
Polygonum bistorta		1.5682	0.378398	-0.0538107
Potentilla anserina	0.272763	1.71851	0.489958	0.208471			2.5867	1.30535
Potentilla reptans		1.53782	0.544068	0.0788826
Potentilla verna		1.77085	0.342423	0.104639
Primula elatior	0.490016	1.62479	0.390935	0.00652679			2.4023	1.02938
Primula farinosa		1.65321	0.230449	-0.122764
Ranunculus acris	0.257251	1.80382	0.373831	0.180062			2.39147	1.20683
Ranunculus bulbosus		1.74819	0.463893	0.184496
Ranunculus ficaria		1.50515	0.518514	0.0339844
Ranunculus nemorosus		1.82607	0.30103	0.114094
Taraxacum officinale	0.336432	1.53655	0.556303	0.0928575			2.82102	1.35603
Trifolium repens	0.302218	1.53019	0.653213	0.183405			2.68194	1.21219
Veronica chamaedrys		1.50515	0.230449	-0.0548097
Castilleja sp		1.81954	0.376577	0.196121
Geranium sp		1.77815	0.120574	-0.101275
Lachemilla sp		1.96848	-0.0315171	-0.0630341
Lupinus sp		1.716	0.507856	0.223859
Plantago lanceolata		1.77085	0.363612	0.134464
Taraxacum officinale		1.51851	0.60206	0.120574
Trifolium repens		1.60206	0.536558	0.138618
Baccharis arbutifolia	0.431364	1.97772	0.465383	0.445291
Bomarea glaucescens		2.0569	0.33646	0.393365
Calamagrostis intermedia		2.29885	-0.173925	0.124928
Carex pichinchensis		1.94448	0.217484	0.161967
Chuquiraga jussieui	0.80618	2.15229	0.225309	0.396858
Diplostephium rupestre	0.591065	2.18752	0.352183	0.539135
Geranium confertum	0.529726	1.90309	0.404834	0.307924
Gunnera magellanica		2.03743	0.356026	0.393452
Gynoxis sp	0.982271	2.22531	0.201397	0.429739
Halenia weddelifolia		1.94448	0.225309	0.169792
Loricaria ilinissae	1.33646	2.29885	0.0293838	0.339563
Lupinus kunthii	0.538078	1.92428	0.592177	0.516456
Luzula gigantea		1.77085	0.190332	-0.0388163
Niphogeton dissecta	0.806923	2.10037	0.448706	0.549077
Plantago rigida		2.21219	0.123852	0.336039
Ranunculus peruvianus	0.542194	1.83885	0.518514	0.357363
Senecio comosus	0.529726	1.82607	0.568202	0.394277
Valeriana pilosa	1.00685	2.08636	0.260071	0.346431
Werneria nubigena	0.938492	2.26007	0.350248	0.610319
Aa sp		2.02531	0.421604	0.44691
Agrostis nigritella		1.96848	0.334454	0.302937
Astragalus geminiflorus		2.12744	0.539703	0.670802
Azorella pedunculata		2.11059	0.206826	0.317416
Calandrinia acaulis		2	0.429752	0.429752
Cerastium mollissimum	0.58877	1.81291	0.429752	0.242666
Culcitium canescens		2.44248	0.0827854	0.525265
Culcitium nivale	0.806923	2.37453	0.1959	0.570864
Culcitium reflexum		2.233	0.198657	0.431653
Draba aretioides		1.88081	0.32838	0.209193
Erigeron ecuadoriensis	0.951457	1.81954	0.456366	0.27591
Gentianella numularifolia		1.81291	0.222716	0.0356298
Hypochoeris sonchoides	0.762401	1.93952	0.363612	0.303131
Lachemilla orbiculata		2.11394	0.0606978	0.174641
Luzula racemosa	0.82224	2.0086	0.0934217	0.102022
Nototriche phyllanthos	0.837035	1.94448	0.394452	0.338934
Oreomyrrhis andicola	0.739605	2.03743	0.278754	0.31618
Plantago nubigena	1.03144	2.19866	-0.107905	0.0907517
Rumex acetosella		1.82607	0.371068	0.197143
Silene thysanodes	0.882376	1.87506	0.431364	0.306425
Werneria humilis		1.98677	0.161368	0.14814
Werneria nubigena		2.19866	0.155336	0.353993
Werneria pumila	0.675251	2.233	0.240549	0.473545
Bromus lanatus		1.9345	0.419956	0.354454
Castilleja fissifolia		1.68124	0.143015	-0.175744
Cerastium mollissimum		1.77085	0.50515	0.276002
Culcitium reflexum		2.29226	0.164353	0.456609
Viola sp		1.86923	0.692847	0.562079
Arbutus menziesii		2.08991	0.128709	0.218614			1.80277	0.889862
Heteromeles arbutifolia		2.36361	0.0156699	0.379282			1.6561	1.02612
Prunus ilicifolia		2.19866	0.250242	0.448899			1.734	0.931966
Rhamnus californica		2.02531	0.279977	0.305283			1.85552	0.879096
Umbellularia californica		2.11727	0.246809	0.36408			1.79588	0.925828
Didymopanax macrocarpum								1
Qualea grandiflora								1.0607
Miconia fallax								0.977724
Roupala montana								1.04139
Ouratea hexasperma								0.653213
Acer monspessulanum		1.92445	0.347835	0.272288
Aegilops geniculata		1.56864	0.513794	0.0824303
Aegilops ovata		1.63639	0.451786	0.090427
Avena barbata		1.61083	0.382157	-0.00145421
Avenula bromoides		1.73518	0.305351	0.0869546
Brachypodium distachyon		1.48413	0.235528	-0.271499
Brachypodium phoenicoides		1.8041	0.209515	0.0401999
Brachypodium retusum		1.74352	0.281033	0.0340554
Bromus erectus		1.73993	0.328088	0.0749635
Bromus lanceolatus		1.58922	0.273851	-0.123059
Bromus madritiensis		1.4318	0.324282	-0.242902
Bupleurum rigidum		2.02687	0.137664	0.164536
Buxus sempervirens		2.21467	0.060252	0.274922
Calamintha nepeta		1.57512	0.504373	0.0794913
Clematis vitalba		1.56067	0.508166	0.0688333
Convolvulus arvensis		1.64397	0.458192	0.102166
Crepis sancta		1.58004	0.276772	-0.143184
Crepis vesicaria		1.74473	0.440904	0.185632
Dactylis glomerata		1.64846	0.440819	0.0898882
Daucus carota		1.88941	0.440904	0.330315
Desmazeria rigida		1.63264	0.40654	0.0696822
Dichanthium ischaemum		1.5376	0.305351	-0.154592
Kickxia spuria		1.46218	0.342338	-0.195481
Medicago minima		1.48017	0.684257	0.164429
Melica ciliata		1.63451	0.432167	0.0864563
Phillyrea latifolia		2.12494	0.060252	0.185191
Phleum pratense		1.56703	0.426511	0.0156699
Pistacia terebinthus		1.96658	0.333959	0.300535
Plantago lanceloata		1.80134	0.253648	0.054991
Psoralea bituminosa		1.71897	0.63216	0.351126
Quercus ilex		2.17393	0.21832	0.392245
Quercus pubescens		2.00436	0.229224	0.233588
Rubia peregrina		1.84771	0.15076	-0.00152884
Rubus sp		1.76955	0.391951	0.161502
Sanguisorba minor		1.75203	0.361282	0.113309
Scabiosa atropurpurea		1.92082	0.443103	0.363922
Urospermum dalechampii		1.49621	0.508166	0.00437529
Viburnum tinus		1.96257	0.100681	0.0632541
Acer monspessulanum	0.757438	1.84466	0.328282	0.172946			2.16223	1.0069
Aristolochia rotunda		1.55909	0.515654	0.0747449
Brachypodium phoenicoides	0.70722	1.74473	0.325415	0.0701426			2.39212	1.13685
Calamintha nepeta		1.53611	0.431995	-0.0318975
Crataegus monogyna	0.684206	1.85078	0.276772	0.127553			2.23231	1.08309
Dactylis glomerata		1.55129	0.535604	0.0868979
Dorycnium pentaphyllum	0.747337	1.73755	0.533828	0.271377			2.25158	0.989134
Helianthemum nummularium		1.82391	0.408889	0.232798
Lavandula latifolia		1.91364	0.289453	0.203093
Pistacia terebinthus		1.84466	0.394411	0.239075
Plantago lanceloata	0.650427	1.70115	0.379434	0.0805812			2.52567	1.22682
Psoralea bituminosa		1.71444	0.644749	0.359191
Quercus pubescens		1.97469	0.325415	0.300109
Rubia peregrina	0.675251	1.78781	0.289453	0.0772653			2.31425	1.10207
Rubus sp	0.824384	1.72816	0.363922	0.0920805			2.23605	0.96421
Scabiosa atropurpurea		1.86967	0.472774	0.34244
Teuchrium chamaedrys	0.853348	1.84466	0.325415	0.170079			2.31844	1.16311
Viburnum tinus	1.08391	1.78781	0.183865	-0.028323			1.8814	0.669216
Acer monspessulanum		1.89963	0.253648	0.153278
Aegilops geniculata	0.323068	1.64397	0.399482	0.0434566			2.52503	1.16901
Agropyron sp		1.56067	0.544068	0.11211
Anagallis arvensis		1.39794	0.460305	-0.141755
Aristolochia rotunda		1.68825	0.542637	0.230884
Avena barbata		1.59517	0.394411	-0.0104223
Avenula bromoides	0.408983	1.79615	0.239945	0.0360963			1.83445	0.630602
Brachypodium distachyon	0.336432	1.52578	0.383986	-0.0902304			2.40243	0.928218
Brachypodium phoenicoides	0.569967	1.81382	0.229646	0.0751066			2.01469	0.865314
Bromus erectus	0.446307	1.73166	0.299798	0.0470163			2.21355	1.03457
Bromus hordeaceus		1.54975	0.426511	-0.0159734
Bromus lanceolatus	0.329802	1.61208	0.342385	-0.0455383			2.3665	0.978578
Bromus madritiensis		1.44612	0.33646	-0.206179
Bupleurum rigidum	0.624098	1.90658	0.210206	0.116784			2.41466	1.32123
Buxus sempervirens	1.20531	2.21467	0.163912	0.378583			1.51741	0.732083
Calamintha nepeta	0.542194	1.57823	0.419421	-0.00234718			2.37924	0.957474
Carex hallerana	0.624098	1.86012	0.269902	0.130022			2.16285	1.02297
Catananche coerulea	0.471131	1.79588	0.307651	0.103531			2.5722	1.36808
Clematis vitalba		1.70553	0.438694	0.144228
Convolvulus arvensis		1.58004	0.460305	0.0403496
Crataegus monogyna		1.97881	0.203343	0.182154
Crepis sancta		1.48945	0.263709	-0.246836
Crepis vesicaria		1.58838	0.328282	-0.083338
Dactylis glomerata	0.29504	1.65956	0.48045	0.140006			2.11152	0.771081
Daucus carota	0.435966	1.75056	0.40239	0.152947			2.44053	1.19108
Dorycnium hirsutum	0.516888	1.67613	0.504068	0.180198			2.44791	1.12404
Dorycnium pentaphyllum		1.83863	0.425192	0.263824
Echinops ritro	0.50366	1.92812	0.429746	0.357864			2.33036	1.25848
Eryngium campestre	0.39195	1.98716	0.334206	0.321369			2.35119	1.33835
Helianthemum nummularium	0.419978	1.8066	0.354828	0.161425			2.16432	0.970915
Hordeum murinum		1.53165	0.4843	0.0220781
Juniperus oxycedrus	1.25883	2.14874	-0.0755656	0.073176			1.40121	0.54995
Kickxia spuria		1.46597	0.322529	-0.211497
Lavandula latifolia	0.620692	1.9692	0.234892	0.20409			1.66179	0.630985
Lolium rigidum		1.59688	0.394452	-0.00169226
Lonicera etrusca		1.82102	0.260381	0.0814045
Lotus corniculatus		1.68403	0.486882	0.170912
Medicago minima	0.361986	1.66354	0.573844	0.237384			2.39073	1.05427
Phillyrea latifolia		2.04096	0.257028	0.297986
Phleum pratense	0.30928	1.61261	0.391443	0.00405343			2.14943	0.762041
Pistacia terebinthus	0.754934	1.99012	0.325256	0.31538			2.08453	1.07465
Plantago lanceloata		1.77728	0.307806	0.0850897
Potentilla crantzii	0.58877	1.91009	0.257353	0.167448			2.37199	1.28209
Prunus mahaleb	0.63416	1.88739	0.343756	0.231151			2.24887	1.13627
Prunus spinosa	0.721008	1.90658	0.279366	0.185944			2.19661	1.10319
Psoralea bituminosa		1.70333	0.623559	0.326894
Quercus ilex	1.35699	2.22621	0.114077	0.340291			1.7312	0.957418
Quercus pubescens	0.830756	2.03598	0.304213	0.340189			1.86493	0.900908
Rosa micrantha	0.525489	1.89279	0.279366	0.172156			2.21937	1.11216
Rubia peregrina		1.73049	0.313755	0.0442425
Rubus sp		1.91009	0.27029	0.180385
Ruscus aculeatus		1.74232	0.429739	0.172061
Sanguisorba minor	0.485371	1.7122	0.322374	0.0345726			2.31959	1.03179
Scabiosa atropurpurea		1.92082	0.394411	0.31523
Stachys officinalis		1.78252	0.3167	0.0992159
Teuchrium chamaedrys	0.715545	1.88606	0.29879	0.184846			1.72628	0.612333
Thymus vulgaris	0.769741	1.89739	0.295699	0.193094			1.92288	0.820277
Trifolium angustifolium		1.66354	0.511926	0.175466
Urospermum dalechampii		1.61798	0.319624	-0.0623926
Viburnum tinus		1.92445	0.0385327	-0.0370142
Viola scotophylla	0.566106	1.67572	0.292411	-0.0318713			2.25693	0.932648
Vulpia ciliata		1.42366	0.320146	-0.234469
Xeranthemum inapertum	0.265076	1.44916	0.498319	-0.0525208			2.56717	1.01633
Cistus monspeliensis		2.1267	0.320146	0.53936			2.27016	1.38292
Cneorum tricoccon		2.00466	0.303196	0.38689			2.02996	1.0267
Hypericum balearicum		2.06854	0.389166	0.73434			1.99608	1.03463
Phillyrea latifolia		2.08369	0.25042	0.478364			2.02631	1.09972
Pinus halepensis		2.09795	0.113943	0.211894			1.78343	0.881385
Pistacia lentiscus		2.31843	0.149219	0.453279			1.79736	1.09929
Rhamnus ludovici-salvatoris		2.21921	0.260071	0.328608			1.7694	0.98357
Urginea maritima		2.04235	0.49276	0.672068			2.04653	1.08814
Arbutus unedo		2.2152	0.075547	0.117898			1.74213	0.957787
Cistus albidus		2.04007	0.287802	0.628107			2.20205	1.2165
Cistus salvifolius		2.13243	0.267172	0.307242			2.16049	1.29474
Quercus coccifera		2.22794	0.0791812	0.205878			1.77358	0.99875
Quercus Ilex		2.28988	0.1959	0.411095			1.7761	1.06296
Rhamnus alaternus		2.17931	0.305351	0.437782			1.82897	1.01062
Acer opalus		1.75251	0.514548	0.267057			2.12683	0.870989
Avenula crassifolia		1.96417	0.346353	0.310518			2.16446	1.12613
Capparis spinosa		1.8898	0.673942	0.563746			2.55641	1.44274
Cephalaria squamiflora		2.05773	0.359835	0.417564			2.24437	1.29447
Crepis triasii		1.72787	0.519828	0.247694			2.4545	1.18327
Delphinium pictium		1.7545	0.592177	0.346678			2.51083	1.2584
Dianthus rupicola		2.0586	0.307496	0.3661			2.15219	1.20862
Euphorbia margalidiana		1.90482	0.564666	0.46949			2.21754	1.12156
Globularia cambessedesii		2.19571	0.212188	0.407897			2.03098	1.21792
Ligusticum huteri		1.60358	0.618048	0.221625			2.58783	1.18893
Limonium migjornense		2.03195	0.392697	0.424645			2.19075	1.21836
Phlomis italica		2.04178	0.320146	0.36193			2.26036	1.30103
Pistacia terebinthus		2.13008	0.450249	0.580327			2.18968	1.31492
Pteridium aquilinum		2.03499	0.332438	0.367426			2.0615	1.09049
Silene mollisima		1.83569	0.563481	0.399172			2.33261	1.16286
Urtica atrovirens		1.64464	0.609594	0.25423			2.54847	1.19257
Viola jaubertiana		1.72206	0.562293	0.284351			2.33761	1.05269
Viola stolonifera		1.58883	0.622214	0.211046			2.51034	1.09517
Viola x balearica		1.80298	0.429752	0.232731			2.26663	1.06744
Amaranthus blitoides		1.74135	0.635484	0.37683			2.79337	1.53111
Amaranthus retroflexus		1.7705	0.40654	0.177045			2.53265	1.3032
Anagyris foetida		1.97944	0.570543	0.623739			2.36394	1.32804
Atriplex halimus		1.94188	0.716003	0.657887			2.41218	1.33613
Beta vulgaris		1.71314	0.580925	0.560361			2.6519	1.35097
Ceratonia siliqua		2.40203	0.155336	0.557368			1.7193	1.1214
Chenopodium album		1.83119	0.623249	0.336385			2.59874	1.42078
Cichorium intybus		1.54425	0.550228	0.094476			2.73986	1.27339
Convolvulus arvensis		1.6214	0.737987	0.359389			2.62931	1.2418
Datura stramonium		1.68488	0.757396	0.607446			2.7757	1.45586
Dittrichia viscosa		1.73105	0.531479	0.262533			2.50318	1.22185
Fraxinus angustifolia		2.0532	0.374748	0.446262			2.30722	1.35539
Helleborus lividus		2.23251	0.227887	0.288169			1.88272	1.11394
Helleborus foetidus		2.22616	0.220108	0.452621			1.83867	1.06483
Lavandula dentata		1.90006	0.390935	0.290993			2.47394	1.37779
Lavatera cretica		1.6794	0.702431	0.381832			2.80353	1.45763
Paeonia cambessedesii		2.06028	0.240549	0.174442			2.02429	1.08458
Populus alba		1.96381	0.371068	0.0559431			2.2786	1.22011
Quercus humilis		2.02267	0.436163	0.440823			2.20347	1.21978
Verbascum sinuatum		1.86453	0.318063	0.182595			2.53121	1.39533
Vitex agnus-castus		1.92047	0.523746	0.444214			2.44478	1.35443
Castanopsis sieboldii	1.15196	2.08448	0.00160039	0.0860767			1.6464	0.783546
Quercus acuta	1.16035	2.04558	-0.100361	-0.0547853			1.6698	0.754348
Camellia japonica	1.09109	2.00526	0.00592776	0.011191			1.86178	0.867552
Cleyera japonica	0.894404	2.02493	0.0598479	0.0847752			1.8393	0.867762
Cinnamomum japonicum	1.37661	2.04997	-0.0104091	0.0395563			1.60548	0.670555
Neolitsea sericea	1.20133	1.97954	0.0212604	0.000800088			1.61782	0.591065
Illicium anisatum	1.22267	1.76338	0.0980375	-0.138582			1.82453	0.58121
Maesa japonica	1.15783	1.9094	0.0428644	-0.0477359			1.78135	0.700415
Boehmeria sp		1.74275	0.39838	0.142555			2.00862	0.742856
Syzygium sp1		1.8219	0.170256	-0.043095			1.7236	0.534872
Macaranga triloba		1.54185	0.514726	0.0674192			2.34139	0.901785
Parashorea malaanonan		1.68554	0.279696	-0.0321112			1.9406	0.626546
Shorea argentifolia		1.66563	0.32442	-0.0107249			2.027	0.691612
Drimys piperita		1.82304	0.180094	0.00392172			1.86914	0.679947
Syzygium confertum		2.05853	0.132402	0.186642			1.67209	0.765544
Macaranga sp		1.81974	0.171177	-0.00461278			1.89256	0.71419
Trigonobalanus verticillatus		1.98573	0.184205	0.170829			1.7402	0.729974
Tristaniopsis clementis		2.10263	0.052831	0.145636			1.77221	0.817754
Drimys piperita		2.06936	0.253431	0.32695			1.50555	0.572208
Syzygium houttuynii		2.25616	0.100785	0.352381			1.29439	0.539076
Lithocarpus havilandii		2.32268	0.0854665	0.403564			1.23644	0.550024
Photinia davidiana		2.16636	0.347035	0.505313			1.6562	0.814137
Schima brevifolia		2.20386	0.0867273	0.294393			1.43391	0.614546
Drimys piperita		2.07425	0.345775	0.416146			1.39049	0.437486
Syzygium sp2		2.26102	0.245858	0.502548			1.20465	0.451567
Photinia davidiana		2.1103	0.3363	0.427533			1.50012	0.56753
Scolopia crassipes		2.07918	0.133539	0.212188	-1.0752	-0.996023
Eugenia mabaeoides		1.95424	0.11059	0.064458	-1.14691	-1.19267
Acronychia pedunculata		2.01284	0.322219	0.334454	-1.02549	-1.01265
Actinodaphne ambigua		2.18469	0.0569049	0.240549	-1.17393	-0.989234
Allophylus varians		1.94448	0.356026	0.30103	-0.818442	-0.87396
Michelia nilagirica		1.91908	0.262451	0.181844	-0.93968	-1.0206
Acer saccharum		1.81417	0.206826	0.0210005	-0.958607	-1.14443
Carya glabra		1.8729	0.220108	0.0930033	-0.920819	-1.04792
Fagus grandifolia		1.83003	0.294466	0.124498	-0.920819	-1.09079
Liriodendron tulipifera		1.88439	0.235528	0.119918	-0.920819	-1.03643
Quercus alba		1.89585	0.252853	0.148707	-0.721246	-0.825392
Quercus prinus		1.94006	0.176091	0.116149	-0.886057	-0.945999
Quercus rubra		1.97265	0.209515	0.182165	-0.920819	-0.948168
Quercus velutina		2.02182	0.139879	0.161699	-0.920819	-0.898999
Acer rubrum		1.85733					2.06112	0.91845
Acer saccharum		1.77085					1.93321	0.704065
Fagus grandfolia		1.79239					2.01865	0.811039
Populus grandidentata		1.89209					2.28642	1.17852
Quercus rubra		2.04139					2.05517	1.09656
Anacardium excelsum	0.9268	1.92	0.220108	0.144904			2.09639	1.02119	1.41366	0.338456
Luehea seemannii	0.8024	2.14	0.307496	0.442947			2.13172	1.26717	1.32993	0.465383
Castilla elastica	0.7649	1.89	0.32838	0.217121			2.00335	0.892095	1.43348	0.322219
Antirrhoea trichantha	0.7599	1.97	0.31597	0.284453			2.31707	1.28556	1.26197	0.230449
Urera caracasana	0.4759	1.83	0.583199	0.408625			2.36491	1.19033	1.46013	0.285557
Cecropia longipes	0.4564	2.06	0.416641	0.47847			2.23702	1.29885	1.33611	0.39794
Acer palmatum		1.65321					1.96658	0.619789
Acer mono	0.649335	1.75205	0.20412	-0.0438316			1.90553	0.657577
Carpinus cordata		1.79796					1.93678	0.734743
Cornus contraversa	0.634477	1.79796					1.97077	0.768728
Ostrya japonica	0.672098	1.81291					2.00852	0.821434
Populus sieboldii	0.546543	1.83251					2.17725	1.00976
Prunus ssiori		1.86034					1.87943	0.739764
Maackia amurensis	0.62634	1.88081					1.94882	0.829629
Juglans ailanthifolia	0.565848	1.90037	0.491362	0.391729			1.95678	0.85715
Cercidiphyllum japonicum	0.641474	1.85733					2.00737	0.864703
Sorbus commixta	0.713491	1.86629					2.00214	0.868431
Fraxinus madshurica	0.572872	1.85733	0.380211	0.237544			2.02209	0.879426
Kalopanax pictus		1.87506					2.01332	0.888381
Tilia japonica		1.86923	0.380211	0.249443			2.03138	0.900615
Betula maximowicziana		1.86332					2.06726	0.930579
Betula platyphylla		1.86332	0.531479	0.394802			2.11877	0.982088
Alnus hirsuta	0.517196	1.89487	0.50515	0.40002			2.15823	1.0531
Tilia maximowicziana		1.91116					1.94024	0.851397
Ulmus davidiana		1.91908	0.50515	0.424228			1.94562	0.864703
Prunus sargentii		1.9345					1.96612	0.900615
Sorbus alnifolia		1.92942					1.97804	0.907455
Magnolia obovata	0.618048	1.90849					2.03477	0.94326
Alnus japonica		1.90849					2.10127	1.00976
Betula ermanii	0.649335	1.91381					2.1465	1.06032
Fagus crenata	0.725912	1.98					1.75726	0.737261
Quercus mongolica	0.719331	1.95904					1.87463	0.833669
Ulmus laciniata	0.546543	1.98227					1.92178	0.904049
Betula davurica		1.98453					1.97709	0.961613
Salix hultenii		2.01284					1.84811	0.860943
Populus maximowiczii	0.556303	2.01072					2.09702	1.10774
Nothofagus menziesii		2.17783	0.126969	0.304801
Griselinia littoralis		2.02919	0.0203397	0.0495281
Gaultheria antipoda		2.05453	-0.0388616	0.0156699
Ranunculus hirtus		1.77833	0.146264	-0.0754106
Achillea millefolium		1.69332	0.358955	0.0522717
Alnus incana		1.858	0.5075	0.365502
Andromeda polifolia	1.16817	2.11089	0.191269	0.302163
Angelica sylvestris		1.47629	0.473411	-0.0502954
Anthriscus sylvestris		1.3706	0.374707	-0.254691
Arctostaphylos alpina	0.471131	1.93005	0.158434	0.0912547
Astragalus alpinus		1.61414	0.59364	0.279903
Astragalus frigidus		1.6693	0.703757	0.378078
Bartsia alpina		1.85603	0.420113	0.27563
Betula nana	0.478309	1.90542	0.350165	0.257827
Betula pubescens		1.8385	0.440723	0.279226			2.07918	0.917684
Calamagrostis lapponica		1.58988	0.244967	-0.165152
Caltha palustris		1.38021	0.553461	-0.0663293
Carex capitata		1.87559	0.232303	0.107895
Carex rostrata		1.83862	0.382859	0.221474
Carex vaginata		1.79375	0.286156	0.079905
Cassiope tetragona	1.51776		-0.0705811
Chamerion angustifolium		1.82087	0.469869	0.290739
Cornus suecica		1.50946	0.31503	-0.175505
Deschampsia cespitosa		1.7439	0.270488	0.0143924
Diphasiastrum complanatum			-0.0947169
Drosera rotundifolia		1.40097	0.0792708	-0.519758			1.65896	0.0599362
Dryas octopetala	0.441168	1.96942	0.306221	0.27981
Elytrigia repens		1.61742	0.388039	0.00546043
Empetrum hermaphroditum	1.61031	2.24797	-0.107905	0.140068
Empetrum nigrum	1.60996	1.94122	0.0780164	0.0192322			1.60206	0.543276
Equisetum sylvaticum		1.61251	0.362518	-0.0249749
Eriophorum angustifolium		1.88356	0.409388	0.292944
Euphrasia frigida		1.48651	0.730386	0.216894
Filipendula ulmaria		1.54758	0.443789	-0.00862856
Geranium sylvaticum		1.66384	0.434792	0.0986327
Gymnocarpium dryopteris		1.44996	0.216641	-0.333404
Juncus arcticus		2.3557	0.349002	0.704704
Juniperus communis		2.22209	0.0590216	0.281115
Lathyrus pratensis		1.5308	0.686813	0.217613
Loiseleuria procumbens	1.5692	2.39794	-0.148742	0.249198
Lycopodium annotinum			-0.0664874
Matteuccia struthiopteris		1.56605	0.517197	0.0832489
Melampyrum sylvaticum		1.49779	0.269643	-0.232565
Orthilia secunda		1.74547	0.273482	0.0189468
Pedicularis lapponica	0.316229	1.78879	0.487689	0.254191
Pedicularis sceptrum-carolinum		1.80754	0.268677	0.0762176
Phyllodoce caerulea	1.44885	2.07555	-0.0809219	-0.00537495
Picea abies x obovata		2.47845	0.121898	0.600347
Pinguicula vulgaris		1.21605	0.200317	-0.583631			1.78533	0.00138203
Pinus sylvestris		2.4792	-0.0251104	0.454091
Polygonum viviparum	0.265076	1.84436	0.499595	0.37396
Populus tremula		1.8862	0.398789	0.284988
Rhinanthus minor		1.8171	0.550003	0.367105
Rhodiola rosea		1.53215	0.494424	0.0265718
Rhododendron lapponicum	1.14065	2.12829	0.221642	0.353089
Ribes spicatum		1.52334	0.468833	-0.00782599
Rubus chamaemorus		1.90863	0.274862	0.176992
Rubus saxatilis		1.48251	0.359035	-0.158459
Rumex obtusififolius		1.6044	0.522745	0.127148
Salix lapponum		1.93323	0.389405	0.322636
Salix myrsinites	0.473537	2.06589	0.236358	0.29709
Salix reticulata	0.508114	2.09822	0.227961	0.324941
Solidago virgaurea		1.56016	0.457034	0.0171982
Sorbus aucuparia		1.79755	0.287006	0.0845537
Tanacetum vulgare		1.68892	0.423399	0.112316
Trifolium pratense		1.40709	0.673672	0.0807636
Vaccinium myrtillus	0.471131	1.73113	0.277858	0.00997804			2.01284	0.695787
Vaccinium uliginosum	0.471131	1.89139	0.297829	0.202942			2.01284	0.817416
Vaccinium vitis-idaea	1.44477	2.20272	-0.0159884	0.192486			1.60206	0.727579
Viccia cracca		1.44405	0.735002	0.179052
Arctostaphylos alpina	0.38612	1.98227	0.269513	0.251784
Astragalus alpinus		1.66276	0.749736	0.412494
Astragalus frigidus		1.6721	0.745855	0.417953
Bartsia alpina		1.90139	0.390935	0.290925
Betula nana	0.316229	1.91075	0.498999	0.409798
Carex saxatilis		1.79056	0.462072	0.252634
Cassiope tetragona	1.59085	2.13349	0.134145	0.259201
Diapensia lapponica	1.62664	2.19574	0.131939	0.328359
Dryas octopetala	0.419978	2.05641	0.30963	0.3659
Empetrum hermaphroditum	1.62138	2.19137	-0.0154727	0.176323
Juncus trifidus		1.76165	0.508932	0.270581
Loiseleuria procumbens	1.71829	2.36321	0.0232525	0.387675
Luzula multiflora		1.5326	0.361281	-0.106121
Oxyria digyna		1.79452	0.545307	0.337779
Pedicularis hirsuta		1.69298	0.441774	0.134754
Pedicularis lapponica	0.349397	1.95899	0.361728	0.320437
Phleum alpinum		1.61856	0.498824	0.117384
Phyllodoce caerulea	1.53392	2.10697	0.0433623	0.149973
Polygonum viviparum	0.241164	1.94398	0.569959	0.514501
Potentilla crantzii	0.33971	1.91356	0.428135	0.342817
Ranunculus nivalis	0.425373	1.69604	0.4843	0.18057
Rhododendron lapponicum	1.12219	2.2014	0.271842	0.473239
Rubus chamaemorus		1.90309	0.414973	0.318063
Salix herbacea	0.421784	1.9127	0.426767	0.345453
Salix myrsinites		1.97772	0.394452	0.372175
Salix polaris	0.395793	1.92012	0.395326	0.326039
Salix reticulata	0.435966	2.03832	0.356026	0.395344
Sibbaldia procumbens	0.19813	1.80251	0.460898	0.264936
Trollius europaeus		1.55536	0.397713	-0.0469281
Vaccinium myrtillus	0.336432	1.86332	0.212188	0.0755105
Vaccinium uliginosum	0.346192	1.90423	0.39794	0.306425
Vaccinium vitis-idaea	1.56611	2.3913	-0.0132283	0.380284
Veronica alpina		1.56104	0.490714	0.0517536
Cassiope tetragona	1.71719		0.075547
Dryas octopetala		2.07188	0.371068	0.44295
Oxyria digyna		1.85126	0.628389	0.479647
Polygonum viviparum		1.90309	0.603144	0.506234
Salix polaris		1.86923	0.586587	0.455819
Rubus corylifolius	0.778151	1.84771	0.264818	0.112529	-0.721246	-0.873535	2.26951	1.11394
Prunus spinosa	0.763428	1.95468	0.326336	0.281013	-0.744727	-0.79005	2.06819	1.02119
Crataegus x macrocarpa	0.819544	2.04096	0.30963	0.350589	-0.619789	-0.57883	1.95904	1
Acer campestre	0.78533	1.97881	0.287802	0.266612	-0.721246	-0.742436	2	0.977724
Ribes uva crispa	0.908485	1.81248	0.313867	0.126347	-0.823909	-1.01143	2.18752	1
Aegle marmelos		2.05918	0.285557	0.344742	-0.283997	-0.224812
Amoora rohitika		1.60853	0.257679	-0.133795	-0.585027	-0.976501
Annona squamosa		1.73957	0.501059	0.240632	-0.769551	-1.02998
Anthocephalus cadamba		2.05614	0.243038	0.29918	-0.721246	-0.665104
Artocarpus heterophyllus		2.02407	0.418301	0.442376	-0.721246	-0.697171
Artocarpus lakoocha		1.96332	0.298853	0.262169	-0.769551	-0.806236
Azadirachta indica		1.89763	0.4843	0.381927	-0.721246	-0.823619
Bambusa bambos		1.79379	0.361728	0.155518	-0.853872	-1.06008
Bauhinia variegata		1.88195	0.478566	0.360521	-0.337242	-0.455287
Bombax ceiba		2.06221	0.20412	0.266326	-0.721246	-0.659041
Bougainvellia spectabilis		1.82672	0.436163	0.262885	-0.958607	-1.13188
Carissa carundu		1.94645	0.0681859	0.0146381	-0.823909	-0.877456
Cassia fistula		1.81558	0.342423	0.158	-0.769551	-0.953973
Cordia dichotoma		2.0607	0.326336	0.387034	-0.769551	-0.708853
Crescentia cujete		1.83251	0.30103	0.133539	-0.79588	-0.963371
Dalbergia sissoo		2.08243	0.320146	0.402573	-0.744727	-0.662301
Dillenia indica		1.96332	0.133539	0.0968544	-0.853872	-0.890556
Diospyros embryopteris		2.00817	0.212188	0.220362	-0.568636	-0.560462
Eucalyptus globulus		2.16137	0.103804	0.265172	-0.823909	-0.662541
Ficus benghalensis		2.10175	0.11059	0.212337	-0.958607	-0.85686
Ficus carica		1.93349	0.499687	0.433174	-0.677781	-0.744293
Ficus religiosa		2.03703	0.170262	0.20729	-0.920819	-0.883791
Ficus rumphii		1.89818	0.190332	0.0885082	-0.886057	-0.98788
Gardenia jasminoides		1.91434	0.181844	0.0961867	-0.769551	-0.855208
Grewia asiatica		2.00518	0.238046	0.243227	-0.552842	-0.547661
Hamelia patens		1.82151	0.523746	0.34526	-0.677781	-0.856267
Hibiscus rosa-sinensis		1.66839	0.350248	0.0186339	-0.221849	-0.553463
Holoptelia integrifolia		1.79657	0.439333	0.235907	-0.79588	-0.999306
Ixora alba		1.92273	0.342423	0.265148	-0.568636	-0.645911
Ixora coccinea		2.00647	0.143015	0.149481	-0.823909	-0.817443
Kigelia pinnata		2.03822	0.227887	0.266109	-0.744727	-0.706505
Lagerstroemia speciosa		1.94151	0.307496	0.249007	-0.677781	-0.736269
Litchi chinensis		2.11025	0.152288	0.262541	-0.568636	-0.458383
Madhuca indica		2.05038	0.247973	0.298353	-0.920819	-0.870439
Magnolia grandiflora		2.19424	0.127105	0.321342	-0.920819	-0.726582
Mallotus phillippensis		1.7574	0.396199	0.153595	-0.39794	-0.640544
Mangifera indica		2.13162	0.225309	0.356928	-0.823909	-0.69229
Mimusops elengi		2.09864	0.222716	0.32136	-0.346787	-0.248144
Mimusops hexendra		2.08955	0.209515	0.299067	-0.60206	-0.512508
Mitragyna parviflora		1.95904	0.292256	0.251297	-0.886057	-0.927015
Morus alba		1.82802	0.307496	0.135511	-0.769551	-0.941536
Nyctanthes arbor-tristis		1.99167	0.230449	0.222118	-0.537602	-0.545933
Polyalthia longifolia		1.80686	0.326336	0.133194	-0.677781	-0.870923
Polyalthia pendulosa		1.85612	0.403121	0.259245	-0.619789	-0.763664
Pongamia pinnata		1.78104	0.445604	0.226641	-0.823909	-1.04287
Populus deltoides		2.01157	0.382017	0.393587	-0.744727	-0.733157
Psidium guajava		1.95952	0.238046	0.197564	-0.677781	-0.718262
Pterospermum acerifolia		1.98091	0.155336	0.136248	-0.585027	-0.604115
Quisqualis indica		1.60853	0.463893	0.072419	-0.366532	-0.758006
Sapindus mykorossi		1.71933	0.478566	0.197898	-0.431798	-0.712467
Saraca indica		1.94645	0.30963	0.256082	-0.677781	-0.731328
Schleichera oleosa		1.91009	0.252853	0.162944	-0.283997	-0.373906
Semecarpus anacardium		1.82737	0.262451	0.0898204	-0.537602	-0.710233
Spathodea companulata		2.01578	0.285557	0.301336	-0.769551	-0.753772
Spondias mangifera		1.88762	0.245513	0.13313	-0.823909	-0.936291
Sterculia alata		1.94201	0.357935	0.299943	-0.69897	-0.756962
Sterculia colorata		1.9489	0.217484	0.166386	-0.744727	-0.795826
Strychnos nuxvomica		1.90417	0.418301	0.322476	-0.958607	-1.05443
Swietinia mahogoni		1.9284	0.181844	0.110239	-1.04576	-1.11736
Syzygium jambos		2.06221	0.130334	0.19254	-1.04576	-0.983552
Tabernaemontana coronaria		1.74273	0.613842	0.356567	-0.267606	-0.524881
Tectona grandis		2.13098	0.176091	0.307068	-0.769551	-0.638574
Terminalia arjuna		2.11793	0.164353	0.282287	-0.721246	-0.603313
Terminalia bellirica		2.197	-0.0655015	0.131503	-0.49485	-0.297845
Terminalia chebula		1.87216	0.287802	0.159958	-0.568636	-0.69648
Thevetia paruviana		1.86153	0.283301	0.144836	-0.886057	-1.02452
Woodfordia fruticosa		2.04493	0.123852	0.168783	-0.886057	-0.841125
Ziziphus jujuba		2.1209	0.245513	0.366415	-0.721246	-0.600344
Adina cordifolia	0.954243	2.08743	0.320146	0.407573	-0.823909	-0.736482
Anogeissus latifolia		2.16256	0.158362	0.320927	-1.04576	-0.883193
Bauhinia racemosa		1.91487	0.392697	0.307569	-0.744727	-0.829856
Boswellia serrata		2.09899	0.120574	0.219564	-0.30103	-0.20204
Bridelia retusa		1.93601	0.290035	0.226045	-0.823909	-0.887898
Buchanania lanzan	1	2.06333	0.298853	0.362186	-0.886057	-0.822723
Butea monosperma	1.04139	2.14613	0.404834	0.550962	-0.853872	-0.707744
Diospyros melanoxylon	1.04139	2.07809	0.167317	0.245411	-0.958607	-0.880513
Ficus racemosa	0.845098	1.96426	0.322219	0.286479	-0.721246	-0.756987
Gardenia latifolia		1.94349	0.230449	0.173943	-0.920819	-0.977324
Hardwickia binata		2.07628	0.305351	0.381628	-0.920819	-0.844542
Lagerstroemia parviflora		2.10517	0.130334	0.235503	-1.04576	-0.940588
Lannea coromandelica		1.90687	0.209515	0.116389	-0.327902	-0.421029
Miliusa tomentosa		1.93349	0.356026	0.289513	-0.79588	-0.862393
Pterocarpus marsupium		2.06258	0.394452	0.457034	-1	-0.937418
Shorea robusta	1.11394	1.98856	0.294466	0.283025	-0.958607	-0.970048
Soymida febrifuga		2.12743	0.149219	0.276648	-1.09691	-0.969481
Syzygium cumini	1.11394	2.13481	0.303196	0.43801	-0.958607	-0.823793
Terminalia alata	1	2.02898	0.167317	0.196295	-0.886057	-0.857079
Wrightia tomentosa		1.82413	0.363612	0.187738	-0.886057	-1.06193
Xeromphis uliginosa		1.9248	0.193125	0.117921	-0.958607	-1.03381
Ziziphus glaberrima		1.99782	0.340444	0.338267	-0.886057	-0.888234
Achillea millefolium	0	1.92623	0.264325	0.190557			2.21748	1.14349	1.17609	0.102323
Agropyron repens	0.30103	1.74013	0.25123	-0.00863756			2.19312	0.940006	1.1959	-0.0639677
Amorpha canescens		1.81466	0.376168	0.190829			2.35025	1.16777	1.24055	0.0552108
Andropogon gerardi	0	1.69064	0.226185	-0.0831793			2.46687	1.15968	1.24055	-0.068815
Anemone cylindrica		1.79493	0.271537	0.0664699			2.13033	0.914174	1.11727	-0.0877954
Bromus inermis	0.30103	1.74754	0.201937	-0.0505236			2.18752	0.942653	1.13033	-0.122127
Koeleria cristata	0	1.97126	0.180698	0.15196			2.07188	1.07541	1.09342	0.064684
Lespedeza capitata		1.79783	0.451789	0.249615			2.32222	1.11764	1.42488	0.222707
Lupinus perennis		1.73081	0.515256	0.246066			2.45788	1.19378
Petalostemum villosum		1.93271	0.35308	0.285792			2.41497	1.35032	1.31597	0.248683
Schizachyrium scoparium	0	1.67754	0.177046	-0.145414			2.47129	1.15535	1.18469	-0.137768
Solidago rigida	0.30103	1.96524	0.17368	0.138919			2.19866	1.1698	1.08279	0.0480244
Sorghastrum nutans	0.30103	1.74349	0.293633	0.0371238			2.4216	1.17222	1.22531	-0.0312001
Aextoxicon punctatum	1.73239	2.10292	-0.0177288	0.0863598
Amomyrtus luma	1.62325	2.14935	0.00432137	0.152288
Araucaria araucana	2.45939	2.50307	-0.236572	0.266498
Drimys winteri	1.62325	2.25026	-0.0604807	0.190332
Embothrium coccineum	1.11394	2.01368	0.240549	0.255273
Eucryphia cordifolia	1.63347	2.08831	-0.00436481	0.0791812
Laurelia philippiana	1.6721	2.12668	0.193125	0.320146
Myrceugenia planipes	1.65321	2.04335	0.0569049	0.100371
Nothofagus betuloides	1.44716	2.22403	0.075547	0.292256
Nothofagus nitida	1.57978	2.17783	0.064458	0.243038
Ovidia pillo-pillo	1.39794	1.99482	0.330414	0.326336
Podocarpus nubigena	1.94448	2.31069	-0.0362122	0.274479
Podocarpus saligna	1.57978	2.24795	-0.0315171	0.216435
Saxegothaea conspicua	1.69897	2.12378	0.0293838	0.153166
Weinmannia trichosperma	1.38021	2.17393	-0.0457575	0.120574
Cryptocarya alba	1.49831	2.16115	-0.0705811	0.0905698			1.85187	1.01284	0.969183	0.130334
Drimys winteri	1.44716	2.13668	0.0334238	0.170101			1.80754	0.944483	1.00945	0.146128
Eucryphia cordifolia	1.43136	2.13077	-0.09691	0.0338583			1.91434	1.04532	0.71433	-0.154902
Luma apiculata	1.30963	2.21467	0.0569049	0.271575			1.79379	1.0086	0.98945	0.20412
Nothofagus dombeyi	1.15836	2.09151	0.238046	0.329561			1.9652	1.0569	0.949878	0.0413927
Podocarpus saligna	1.38021	2.22185	-0.00877392	0.213075			1.57054	0.792392	0.773786	-0.00436481
Austrocedrus chilensis	1.4624	2.29243	0.0374265	0.329856			1.58883	0.880814	0.786751	0.0791812
Lomatia hirsuta	1.38021	2.09151	-0.0757207	0.0157943			1.86273	0.954243	0.908485	0
Persea lingue	1.51851	2.01773	0.00432137	0.0220501			1.89597	0.913814	0.635484	-0.346787
Podocarpus saligna	1.44716	2.22915	0.0413927	0.270541			1.56348	0.792392	0.673942	-0.09691
Prumnopitys andina	1.52827	2.16749	-0.0315171	0.135974			1.58092	0.748188	0.61066	-0.221849
Aextoxicon punctatum	1.64345	2.13077	-0.00877392	0.121994			1.617	0.748188	0.568202	-0.30103
Dasyphyllum diacanthoides	1.20412	2.11919	0.0827854	0.201972			1.86332	0.982271	0.893651	0.0128372
Drimys winteri	1.5563	2.25964	-0.21467	0.0449671			1.63849	0.897627	0.970812	0.230449
Embothrium coccineum	0.845098	2.00877	0.181844	0.190618			2.14301	1.15229	1.19535	0.20412
Eucryphia cordifolia	1.53148	2.11919	0	0.119186			1.87622	0.995635	0.767304	-0.113509
Gevuina avellana	1.716	2.18709	-0.09691	0.0901766			1.76716	0.954243	0.812913	0
Laurelia philippiana	1.43136	2.20761	0.161368	0.368976			1.59879	0.80618	0.792392	0
Luma apiculata	1.32222	2.14267	0.0413927	0.18406			1.77085	0.913814	0.971276	0.113943
Myrceugenia planipes	1.5563	2.12494	0	0.124939			1.66745	0.792392	0.720159	-0.154902
Nothofagus dombeyi	1.30103	2.13077	0.11059	0.241358			1.91062	1.04139	1.05956	0.190332
Podocarpus nubigena	1.89209	2.30103	-0.124939	0.176091			1.5966	0.897627	0.631849	-0.0757207
Saxegothaea conspicua	1.5563	2.10791	-0.091515	0.0163904			1.65514	0.763428	0.682957	-0.21467
Andira inermis	1.07918							0.977724
Cassia grandis	1.07918							0.69897
Licania arborea	1.11394							0.90309
Pithecellobium saman	1.0607							1.02119
Psidium guajava	1.11394							0.799341
Simarouba glauca	1.07918							0.919078
Jacquinia pungens	0.812913							1.11394
Ambrosia psilostachya								1.27125
Amorpha canescens								0.984631
Andropogon gerardii								1.25901
Artemisia ludoviciana								1.08988
Asclepias virdaflora								1.30322
Asclepias viridis								1.19768
Aster oblongifolius								1.16907
Callirhoe involucrata								1.21441
Ceanothus herbacesous								1.15578
Dichanthelium oligosanthe								1.14008
Echinacea angustifolia								1.26237
Kuhnia eupatorioides								1.18267
Lespedeza capitata								1.11926
Panicum virgatum								1.36802
Physalis pumila								1.08643
Poa pratensis								0.969027
Psoralea tenuiflora								1.27231
Rhus glabra								1.17995
Rosa arkansana								0.975566
Ruellia humilis								0.943008
Salvia pitcheri								1.24832
Schyzachyrium scoparius								1.2625
Solidago missouriensis								1.15935
Sorghastrum nutans								1.31104
Sporobolus heterolepis								1.20237
Symphoricarpos orbiculatus								0.895745
Vernonia baldwinii								1.12289
Quercus rotundifolia	1.38318	2.38382	0.136721	0.489958			1.7007	1.04922
Quercus suber	1.18341	2.3032	0.290035	0.52763			1.91116	1.14613
Quercus faginea	0.834952	2.14922	0.376577	0.502427			2.03743	1.17026
Quercus pyrenaica	0.731732	2.09342	0.437751	0.521138			2.14922	1.22272
Crataegus monogyna	0.729076	2.08279	0.292256	0.390935			2.01745	1.10721
Pyrus bourgeana	0.653609	2.13033	0.344392	0.454845			2.0465	1.16435
Celtis africana		2.06601	0.429752	0.495759
Cordia caffra		1.914	0.549861	0.463857
Ekebergia capensis		2.02733	0.574263	0.601597
Erythrina caffra		1.77859	0.774882	0.553468
Hyperacanthus amoenus		1.94808	0.543199	0.491275
Isoglossa ciliatus		1.56416	0.661055	0.225211
Podocarpus elongatus		2.44009	0.184691	0.624785
Teclea natalensis		1.87713	0.569491	0.44662
Vepris undulata		2.01637	0.488551	0.504924
Zanthoxylum capense		2.02503	0.414305	0.439333
Calodendrum capense		1.65521	0.657152	0.312366
Celtis africana		1.84986	0.670617	0.520475
Curtissia dentata		2.02319	0.163758	0.186949
Ekebergia capensis		2.14691	0.193403	0.340313
Kiggelaria africana		1.78042	0.690196	0.470612
Olea capensis ssp macrocarpa		2.21824	0.0553783	0.273623
Podocarpus falcatus		2.29585	0.0906107	0.38646
Podocarpus latifolius		2.48812	0.0253059	0.513423
Rapanea melanophloeos		2.42597	0.206556	0.632525
Rhus chirendensis		1.99957	0.431203	0.430769
Scolopia mundii		2.09366	0.158664	0.252329
Trichocladus ellipticus		2.21042	0.142076	0.352496
Vepris undulata		1.83505	0.409764	0.244817
Xymalos monospora		1.90379	0.344392	0.248178
Acacia robusta		2.13549
Adpdytes dimidiata		2.17522	0.364739	0.539962
Albizia adinathifolia		1.98297	0.579784	0.56275
Balanites maughamii		2.10347	0.593508	0.696981
Bequaertiodendron natalense		2.15107	0.40841	0.559482
Celtis africana		1.70421	0.565021	0.269234
Chaetachme aristata		2.03905	0.488551	0.527605
Dalbergia armata		1.96698	0.678336	0.645315
Diospyros natalensis		2.06298	0.27462	0.337604
Hymenocardia ulmoides		2.04769	0.323665	0.371357
Mimusops obovata		1.99439	0.398287	0.392678
Monanthotaxis caffra		1.80493	0.577722	0.382653
Ochna natalitia		2.03858
Pancovia golungensis		2.02246	0.310906	0.333365
Psychotria capensis		1.82711
Rhoicissus tomentosa		1.7693	0.507451	0.276747
Rothmannia globosa		1.81276	0.500785	0.313547
Strychnos decussata		1.98172	0.387212	0.368927
Strychnos gerrardii		1.98801	0.229682	0.217689
Vepris undulata		2.02273	0.544192	0.566926
Diospyros whyteana		2.09691	0.270446	0.367356
Hartogiella schinoides		2.30627	0.126781	0.433054
Maytenus acuminata		2.19246	0.203033	0.395498
Maytenus oleodes		2.30277	0.114944	0.417715
Olea europaea ssp africana		2.34352	0.276462	0.61998
Olinia ventosa		2.08831	0.46568	0.55399
Podocarpus elongatus		2.47886	0.0729847	0.551847
Brabejum stellatifolium		2.40012	-0.0644927	0.335624
Brachylaena neriifolia		2.14813
Cunonia capensis		2.26122
Freylinia lanceolata		2.44129
Ilex mitis		2.20135	0.333044	0.534393
Kiggelaria africana		1.9974	0.396896	0.394298
Rapanea melanophloeos		2.11919	0.269746	0.388933
Rhus tomentosa		2.20831
Apodytes dimidiata		2.1986	0.284431	0.483027
Curtissia dentata		2.02872	0.173769	0.202493
Faurea macnaughtonii		1.98632	0.281942	0.268262
Ocotea bullata		2.06905	0.378398	0.447449
Olea capensis ssp macrocarpa		2.16622	0.108227	0.274442
Olinia ventosa		1.90904	0.458789	0.367826
Podocarpus falcatus		2.27984	0.162564	0.442405
Podocarpus latifolius		2.34008	0.0827854	0.422869
Rapanea melanophloeos		2.03905	0.199481	0.238535
Trichocladus crinitus		2.10824	0.139249	0.247489
Acacia karroo		2	0.606274	0.606274
Celtis africana		1.95156	0.512284	0.463842
Chaetachme aristata		1.75129	0.673942	0.425233
Chionanthus pegleriae		2.0511	0.294687	0.345785
Clausena anisata		1.95273	0.461649	0.414374
Diospyros inhacaensis		2.00922
Diospyros natalensis		2.10791	0.194514	0.30242
Dovyalis longispina		2.07109	0.476687	0.547779
Drypetes natalensis		2.07572	0.396025	0.471746
Eugenia woodii		2.14026	0.289812	0.430073
Inhambanella henriquesii		1.99268	0.358506	0.351185
Sideroxylon inerme		2.1512
Strychnos henningsii ssp gerrardii		2.07366	0.254064	0.327722
Teclea gerrardii		1.91973	0.551206	0.47094
Trema orientalis		1.97798	0.542825	0.52081
Ziziphus mucronata		2.14691	0.311754	0.458664
Cladostemon kirkii		1.80939	0.770999	0.580387
Cleistanthus schlechteri		2.02228	0.32695	0.349226
Cola greenwayi		1.95234	0.422918	0.375254
Combretum fruticosum		1.9431	0.482445	0.42554
Croton steenkampianus		1.89008	0.714162	0.604246
Dialium schlechteri		1.92555	0.516403	0.441952
Drypetes arguta		2.05948
Erythrophleum lasianthum		1.83535	0.686815	0.522165
Newtonia hildebrandtii		2.12784
Pteleopsis myrtifolia		2.03152	0.352375	0.383893
Salacia leptoclada		1.96819	0.358696	0.326884
Strychnos decussata			0.523226
Suregada zanzibariensis		2.19518	0.414806	0.609986
Wrightia natalensis		1.69272	0.67219	0.364908
Buxus macowanii		2.25964	0.547036	0.806673
Cussonia spicata		2.07058	0.20871	0.279291
Ekebergia capensis		2.1986	0.0374265	0.236023
Harpephyllum caffrum		2.32422	0.0305997	0.354821
Hippobromus pauciflorus		2.05651	0.319938	0.376444
Hypoestes verticilliaris		2.00388	0.279439	0.283321
Isoglossa ciliatus		1.71715	0.635584	0.352736
Olea capensis		2.30892	0.139249	0.448168
Olea europaea ssp africana		2.27901	0.0257154	0.30473
Olea woodiana		2.1986	0.131619	0.330215
Podocarpus falcatus		2.39686	0.00817418	0.40503
Ptaeroxylon obliquum		1.92996	0.391993	0.321955
Scolopia zeyheri		2.25493	0.260787	0.515712
Sideroxylon inerme		2.27984	0.269513	0.549354
Teclea natalensis		1.77392	0.598791	0.372706
Trichocladus ellipticus		2.22403	0.162863	0.386889
Umtiza listeriana		1.94386	0.475381	0.419238
Vepris undulata		1.80493	0.574379	0.37931
Zanthoxylum capense		1.93968	0.426836	0.366516
Castanopsis sieboldii		2.19033	0.255273	0.445604			2.01379	1.20412	0.654766	-0.154902
Quercus myrsinaefolia		2.13033	0.322219	0.452553			2.01579	1.14613	0.948847	0.0791812
Machilus thunbergii		2.09691	0.20412	0.30103			2.01703	1.11394	0.748188	-0.154902
Neolitsea sericea		2.07918	0.230449	0.30963			1.82391	0.90309	0.522879	-0.39794
Abronia villosa		1.85387	0.69897	0.552668			2.65031	1.50379
Malvastrum rotundifolium		1.84164	0.642465	0.4843			2.67025	1.51188
Geraea canescens		1.82391	0.732394	0.556303			2.64933	1.47276
Camissonia claviformis		1.88606	0.549003	0.434569			2.61278	1.49831
Camissonia brevipes		1.86967	0.436163	0.305351			2.55023	1.41996
Abutilon theophrastii		1.60206	0.594393	0.1959			2.54158	1.14301
Ambrosia trifida		1.74473	0.644439	0.394452			2.59329	1.33846
Chenopodium album		1.81531	0.580925	0.396199			2.53275	1.3483
Polygonum pensylvanicum		1.77469	0.44248	0.217484			2.43775	1.21219
Protea repens		2.36568	0.136721	0.502427			1.73493	1.1006	0.634325	0
Protea neriifolia		2.34908	0.0374265	0.38739			1.54854	0.897627	0.349887	-0.30103
Protea nitida		2.40243	0.0128372	0.4133			1.43642	0.838849	0.500657	-0.09691
Protea acaulos		2.24279	0.09691	0.32838			1.43845	0.681241	0.6603	-0.09691
Maytenus oleodes		2.25959	0.117271	0.374748			1.60373	0.863323	0.585504	-0.154902
Rhus tomentosa		2.27623	0.0791812	0.365488			1.593	0.869232
Calathea inocephala	1.41497	1.69461	0.238046	-0.0673487			1.83251	0.531479
Pleiostachya pruinoisa	1	1.63347	0.181844	-0.184688			2.17026	0.792392
Psychotria furcata	1.07918	1.64345	0.322219	-0.034328			1.91381	0.556303
Psychotria marginata	1.5563	1.90309	0.130334	0.0334238			1.87506	0.778151
Psychotria limonensis	1.5563	1.77815	0.176091	-0.0457575			1.87506	0.653213
Berberis trifoliolata	0.968675	2.21467	0.113943	0.328614
Condalia hookeri	0.715545	1.83863	0.380211	0.218843
Diospyros texana	0.592435	1.86967	0.322219	0.191886
Prosopis glandulosa	0.832859	1.97469	0.447158	0.421852
Zanthoxylum fagra	0.581346	1.88606	0.361728	0.247784
Ziziphus obtusifolia	0.336432	2.1549
Acer platanoides		1.68305
Alnus glutinosa		1.88874
Alnus incana		1.82607
Amelanchier spicata		1.70757
Andromeda polifolia		2.11926
Aronia melanocarpa		2.03141
Berberis vulgaris		1.88081
Betula humilis		1.90849
Betula nana		2.02938
Betula pendula		1.88081
Betula pubescens		1.79934
Cerasus vulgaris		1.42813
Chamaedaphne calyculata		2.00647
Corylus avellana		1.5682
Cotoneaster interrigimus		1.72754
Crataegus curvisepala		1.94448
Crataegus monogyna		2.04139
Daphne mezereum		1.48996
Euonymus europaeus		1.70757
Frangula alnus		1.41664
Fraxinus excelsior		1.92065
Grossularia reclinata		1.46389
Juniperus communis		1.97543
Ledum palustre		1.86332
Lonicera baltica		1.86982
Lonicera xylosteum		1.60314
Malus domestica		1.58771
Malus sylvestris		1.70757
Myrica gale		1.99034
Padus avium		1.59106
Pentaphylloides fruticosa		1.69461
Physocarpus opulifolius		1.61278
Populus tremula		1.93802
Prunus spinosa		1.75891
Pyrus pyraster		1.94939
Quercus robur		1.78319
Rhamnus cathartica		1.80618
Ribes alpinum		1.79934
Ribes nigrum		1.75587
Ribes rubrum		1.47567
Ribes spicatum		1.41664
Rosa caesia		1.92428
Rosa canina		1.97497
Rosa ciesielski		2.03383
Rosa dumalis		1.94645
Rosa glauca		1.95521
Rosa majalis		1.71181
Rosa mollis		1.89209
Rosa rugosa		2.07954
Rosa spinisissima		1.85552
Rosa subcanina		2.02407
Rubus idaeus		1.5682
Salix acutifolia		1.75511
Salix alba		1.99564
Salix alba fraxinus		1.88649
Salix aurita		1.91908
Salix aurita cinerea		1.98677
Salix caprea		1.77525
Salix cinerea		2.00087
Salix daphnoides		1.97313
Salix dasyclados		1.96988
Salix dasyclados phylicifolia		2.04844
Salix fragilus		2.05538
Salix lapponum		2.01326
Salix myrsinifolia		1.87967
Salix myrtilloides		1.81558
Salix pentandra		1.84323
Salix phylicifolia		1.99432
Salix purpurea		2.02243
Salix rosmarinifolia		2.02119
Salix starkeana		1.92942
Salix triandra		1.91698
Salix viminalis		1.87852
Sambucus nigra		1.74194
Sambucus racemosa		1.68124
Sorbaria sorbifolia		1.60853
Sorbus aria		1.9345
Sorbus aucuparia		1.81954
Sorbus intermedia		1.92428
Swida sanguinea		1.67025
Syringa vulgaris		1.80618
Taxus baccata		1.89265
Tilia cordata		1.40654
Ulmus glabra		1.58546
Ulmus laevis		1.7185
Vaccinium myrtillus		1.60423
Vaccinium uliginosum		1.76193
Viburnum opulus		1.75587
Populus tremula		2.0086	0.332438	0.341039
Fraxinus excelsior		1.89653	0.260071	0.156598
Corylus avellana		1.72754	0.311754	0.0392951
Tilia cordata		1.88024	0.376577	0.256819
Castanopsis sieboldii	1.47712
Quercus salicina	1.38021
Quercus acuta	1.54158
Machilus thunbergii	1.32222
Neolitsea sericea	1.51851
Cinnamomum japonicum	1.74663
Myrsine seguinii	1.71265
Symplocos prunifolia	1.25527
Illicium anisatum	1.44091
Cleyera japonica	1.47712
Eurya japonica	1.47712
Astronium graveolens	0.944483	1.77469	0.42198	0.195656	-0.855846	-1.0777
Bauhinia megalandra	0.977724	1.46597	0.494548	-0.0406485	-0.682984	-1.23031
Bursera simaruba	0.954243	1.70115	0.43177	0.13321	-0.738207	-1.03194
Capparis flexuosa	1.07918	1.94692	0.517506	0.462408	-0.768696	-0.818863
Erythroxylum cumanense	0.973128	1.82391	0.492987	0.3167	-0.801489	-0.97758
Erythroxylum densum	1.07918	1.88273	0.420365	0.225619	-0.917994	-1.11112
Erythroxylum orinocense	0.944483	1.6925	0.452004	0.146438	-0.818863	-1.12885
Eugenia caseariodes	0.977724	1.80688	0.459672	0.171744	-0.639827	-0.929275
Sapindus saponaria	0.977724	1.7122	0.452004	0.119566	-0.846301	-1.18684
Tabebuia chrysantha	0.954243	1.64975	0.45372	0.100681	-0.784783	-1.12885
Chionanthus sp1	1.1726	2.0317	0.215373	0.247078
Diplospora malaccensis	1.35468	2.02811	0.3638	0.391913
Dipterocarpus sublamellatus	1.10857	2.12852	0.211921	0.340444
Elateriospermum tapos	1.06258	2.06424	0.22763	0.291869
Eugenia rugosa	1.3653	2.20358	0.0715138	0.275096
Ganua sp1	1.27462	2.29935	0.147676	0.447028
Homalium dictyoneurum	1.54407	1.9093	0.275081	0.184378
Macaranga lowii	1.27531	1.89765	0.190051	0.0876984
Mangifera foetida	1.36305	2.15183	0.0881361	0.239962
Monocarpia marginalis	1.4188	1.81987	0.55461	0.374477
Ptychopyxis caput-medusae	0.849419	2.10356	0.230193	0.33375
Xanthophyllum stipitatum	1.16227	2.0923	0.303196	0.395494
Aporosa bracteosa		1.89997					1.44404	0.361728
Aporosa lunata		2.08778					1.49136	0.591065
Aporosa microstachya		1.65995					1.49415	0.158362
Baccaurea parviflora		1.94386					1.40993	0.371068
Baccaurea racemosa		2.09583					1.34242	0.437751
Baccaurea reticulata		2.05998					1.46982	0.5302
Diospyros cauliflora		1.86806					1.75891	0.623249
Diospyros maingayi		2.28567					1.46389	0.751279
Diospyros nutans		2.03105					1.35984	0.383815
Garcinia bancana		2.1986					1.60853	0.733197
Garcinia malaccensis		2.08566					1.26717	0.394452
Garcinia small sp		1.87844					1.50379	0.378398
Cirsium arvense		1.79513
Epilobium lirsutum		1.70446
Phragmites australis		1.73682
Urtica dioica		1.63273
Agrostis tenuis		1.59561
Anthoxanthum odoratum		1.52269
Holcus lanatus		1.42196
Leontodon autumnalis		1.48572
Ranunculus repens		1.63727
Carex lasiocarpa		1.95527
Carex nigra		1.77301
Juncus subnodulosus		2.12171
Menyanthes trifoliata		1.62997
Potentilla palustris		1.80631
Cirsium vulgare		1.712
Eupatorium cannabinum		1.53862
Galium aparine		1.32131
Phragmites australis		1.6284
Urtica dioica		1.55146
Brachypodium pinnatum		1.65931
Carex flacca		1.82495
Centaurea jacea		1.72558
Dactylorhiza maculata		1.65831
Leontodon hispidus		1.56788
Ononis repens		1.64026
Plantago lanceolata		1.67021
Calluna vulgaris		2.09765
Carex pilulifera		1.68168
Deschampsia flexuosa		1.76125
Genista anglica		1.81103
Molinia caerulea		1.64428
Rumex acetosella		1.60559
Centaurea jacea		1.78265
Festuca rubra		1.88748
Leucanthemum vulgare		1.841
Plantago lanceolata		1.71322
Trifolium pratense		1.63605
Unidentified composite		1.73891
Carex panicea		1.63939
Cirsium dissectum		1.78857
Erica tetralix		2.0988
Molinia caerulea		1.67129
Salix repens		1.84822
Succisa pratensis		1.78856
Viola palustris		1.4607
Aegiphila lhotzkiana		2.0792	0.426511	0.50571			1.89209	0.973128
Annona coriaceae		2.17321	0.320146	0.493359			1.79239	0.968483
Aspidosperma tomentosum		2.14923	0.0128372	0.162068			1.85733	1.0086
Bauhinia holophylla		2.15534	0.383815	0.539152			1.86332	1.01703
Bowdichia virgilioides		2.22534	0.374748	0.600085			1.74036	0.963788
Campomanesia aromatica		2.17321	0.170262	0.343474			1.8451	1.02119
Caryocar brasiliense		2.07186	0.276462	0.348322			1.90309	0.973128
Connarus suberosus		2.17321	0.187521	0.360733			1.91381	1.08636
Davilla rugosa		2.22012	0.146128	0.366243			1.78533	1.0086
Didymopanax vinosum		2.17025	0.260071	0.430317			2.07555	1.24551
Duguetia furfuracea		2.22272	0.276462	0.49918			1.76343	0.986772
Gochnatia floribunda		2.22534	0.206826	0.432163			1.98227	1.20952
Kielmeyera coriacea		2.31176	0.0374265	0.349185			1.70757	1.02119
Miconia albicans		2.18469	0.164353	0.349041			1.92428	1.11059
Miconia ligustroides		2.11725	0.187521	0.304769			2.02938	1.14613
Piptocarpha rotundifolia		2.20412	0.294466	0.498586			1.88649	1.08991
Qualea dichotoma		2.15534	0.178977	0.334313			1.88081	1.03743
Styrax camporum		2.32221	0.214844	0.537054			1.59106	0.908485
Tibouchina stenocarpa		2.13354	0.206826	0.340361			2.16435	1.29667
Tocoyena formosa		2.19866	0.269513	0.468178			1.61278	0.812913
Callitris intratropica		2.34679	0.045323	0.39211	-1.16115	-0.814363	1.5563	0.892095
Cochlospermum fraseri	0.518514	1.77728	0.245513	0.0227962	-1.09691	-1.31963	2.1959	0.973128
Corymbia foelscheana	0.991226	2.34679	-0.107905	0.238882	-1.4318	-1.08501	1.77085	1.11059
Melaleuca viridiflora	1.0086	2.36653	-0.113509	0.253022	-1.4318	-1.06527	1.78533	1.14922
Planchonia careya	0.929419	2.00436	0.20412	0.208485	-1.07058	-1.06622	2	1.0086
Syzygium eucalyptoides ssp bleeseri	1.05308	2.10237	0.064458	0.166831	-1.19382	-1.09145	1.81954	0.919078
Terminalia ferdinandiana	0.681241	2.08092	0.181844	0.262765	-1.09151	-1.01059	2.03342	1.11059
Xanthostemon paradoxus	1.02119	2.13668	0.0606978	0.197375	-1.3098	-1.17313	1.92942	1.06819
Brachychiton megaphyllus	0.845098	1.9914	0.305351	0.296751	-0.896196	-0.904796	2.03342	1.02531
Buchanania obovata	1.04139	2.21467	0.0606978	0.275368	-1.14267	-0.927997	1.80618	1.02531
Erythrophleum chlorostachys	0.977724	2	0.357935	0.357935	-1.09151	-1.09151	2.04139	1.03743
Eucalyptus tetrodonta	0.913814	2.25964	-0.148742	0.110896	-1.48149	-1.22185	1.79239	1.04532
Planchonia careya	0.845098	1.92445	0.260071	0.184524	-0.954677	-1.03022	2.1038	1.02531
Syzygium suborbiculare	0.977724	2.14267	0.0791812	0.221849	-1.20066	-1.05799	1.91381	1.04532
Terminalia ferdinandiana	0.716003	2.00436	0.178977	0.183342	-1.04576	-1.04139	1.97313	0.973128
Eucalyptus clavigera		2.14569	0.0170333	0.162727			1.9345	1.07918
Eucalyptus miniata		2.09313	0.230449	0.323575			2.11727	1.22011
Acacia auriculiformis	1	2.02228	0.394452	0.416728	-0.920819	-0.898542	2.13354	1.15836
Lophostemon lactifluus	0.939519	2.08092	-0.0177288	0.0631931	-1.3098	-1.22888	1.83251	0.924279
Melaleuca viridiflora	0.991226	2.35655	-0.21467	0.141877	-1.55284	-1.19629	1.80618	1.14922
Ficus racemosa	0.778151	1.81816	0.382017	0.200173	-0.759451	-0.941294	2.39794	1.21484
Ficus scobina	0.681241	1.92082	0.478566	0.399385	-0.730487	-0.809668	2.18184	1.08991
Mallotus nesophilus	0.69897	1.87943	0.350248	0.229674	-0.832683	-0.953257	2.24304	1.12057
Melaleuca leucadendra	0.913814	2.17393	0.0211893	0.195114	-1.08619	-0.912261	2.11059	1.27184
Terminalia microcarpa	0.845098	1.92082	0.357935	0.278754	-0.774691	-0.853872	2.22272	1.12385
Wrightia pubescens	0.832509	1.7167	0.510545	0.227244	-0.785156	-1.06846	2.26007	0.982271
Acantholimon diapensioides		2.11394
Achnatherum splendens		2.07664
Ajania tibetica		2.04179
Allium platyspathum		2.06595
Allium sp		1.55267
Artemisia leucotricha		2
Artemisia pamirica		1.84757
Artemisia rhodantha		1.94448
Astragalus tibetanus		1.61805
Carex dimorphotheca		1.71433
Carex orbicularis		1.91434
Carex pseudofoetida		1.71684
Christolea crassifolia		2.06258
Comarum salesovianum		1.54283
Corydalis stricta		1.96379
Dracocephalum heterophyllum		1.83569
Elymus nutans		1.7007
Ephedra regeliana		1.88138
Gentiana karelinii		1.62737
Gentiana leucomelaena		1.81954
Glaux maritima		1.88252
Gypsophila capituliflora		2.07078
Halerpestes sarmentosa		1.76864
Hedysarum minjanense		1.69197
Hordeum turkestanicum		1.6637
Knorringia pamiricum		2.06558
Kobresia capilliformis		1.61066
Krascheninnikovia ceratoides		1.97035
Leymus pubescens		1.98182
Ligularia alpigena		1.8055
Lindelofia pterocarpa		1.78817
Lomatocarpa albomarginata		1.74036
Macrotomia euchroma		2.09691
Myricaria squamosa		2.04139
Oxytropis chiliophylla		1.5611
Oxytropis globiflora		1.69984
Parnassia laxmannii		1.72099
Pedicularis ludwigii		1.84572
Pentaphylloides dryadanthoides		1.94448
Plantago arachnoidea		1.88195
Potentilla anserina		1.89265
Potentilla malacotricha		1.90956
Potentilla moorcroftii		2.10517
Potentilla multifida		2.00732
Primula algida		2.055
Primula pamirica		1.5966
Pyrethrum djilgense		2.02036
Ranunculus krasnovii		1.6637
Ranunculus pseudohirculus		1.78958
Saussurea salsa		1.87679
Scrophularia pamirica		1.86806
Senecio krascheninnikovii		1.77743
Serratula procumbens		1.91487
Silene graminifolia		1.716
Stellaria winkleri		1.64345
Stipa orientalis		1.54531
Suaeda olufsenii		2.2615
Taraxacum dissectum		1.77887
Taraxacum leucantum		1.82282
Viola tianschanica		1.79588
Zygophyllum rosowii		2.20629
Androsace akbaitalensis		1.59218
Bistorta viviparum		1.91009
Clematis tangutica		1.91487
Draba korshinskyi		1.46687
Draba pamirica		1.81558
Dracocephalum paulsenii		1.80821
Erigeron heterochaeta		1.77452
Erigeron poncinsii		1.83885
Lloydia serotina		2.21906
Oxygraphis glacialis		1.83569
Oxyria digyna		1.64836
Oxytropis incanescens		2.00732
Papaver involucratum		1.85794
Primula macrophylla		2.02612
Rheum spiciforme		2.06595
Rhodiola gelida		1.98363
Rhodiola pamiroalaica		1.64345
Saxifraga hirculus		1.93551
Sibbaldia tetrandra		1.94939
Smelowskia pectinata		1.61172
Swertia marginata		1.73878
Valeriana fedtschenkoi		1.71096
Calamagrostis anthoxanthoides		1.70157
Carex melanantha		1.7796
Carex stenocarpa		1.64345
Chenopodium foliosum		1.82151
Geranium himalayense		1.67852
Leontopodium ochroleucum		1.90255
Lonicera semenovii		1.89154
Potentilla pamirica		2.10992
Ranunculus rufosepalus		1.73799
Rhodiola heterodonta		2.01368
Sophiopsis annua		1.89982
Impatiens noli-tangere		1.15836	0.599883	-0.241752
Capsella bursa-pastoris		1.38917	0.63749	0.0623714
Lepidium ruderale		1.70415	0.604226	0.309237
Thlaspi arvense		1.60746	0.606381	0.212763
Spergula arvensis		1.95424	0.471292	0.321938
Stellaria media		1.48855	0.596597	-0.390566
Chenopodium album		1.23805	0.647383	0.149658
Fumaria officinalis		1.36361	0.692847	0.0564608
Erodium cicutarium		1.26007	0.294466	-0.0560421
Polygonum aviculare		1.47276	0.691081	0.163838
Melampyrum pratense		1.68664	0.519828	0.206465
Spergularia rubra		1.91062	0.432969	0.342141
Leucanthemum vulgare		1.47567	0.340444	-0.0321918
Campanula sibirica		1.9284	0.232996	0.065009
Hyoscyamus niger		1.24797	0.732394	0.282622
Aegopodium podagraria		1.51851	0.610837	0.129394
Vincetoxicum hirundinaria		1.50515	0.64836	-0.0113158
Antennaria dioica		1.60206	0.164353	-0.100964
Anthemis tinctoria		1.87564	0.278754	0.15438
Arctium tomentosum		1.30103	0.674861	0.127159
Artemisia absinthium		1.38202	0.344392	0.0686664
Artemisia vulgaris		1.53148	0.367356	-0.0919643
Aster amellus		1.99078	0.324282	0.315065
Cacalia hastata		1.27416	0.613249	-0.0464271
Cirsium arvense		1.5832	0.287802	0.0344992
Echinops ritro		2.07918	0.162019	0.253695
Inula hirta		1.67394	0.450249	0.248996
Tanacetum vulgare		1.63144	0.381211	0.0972145
Myosotis palustris		1.39794	0.338456	-0.386578
Onobrychis arenaria		2.04961	0.448706	0.186255
Bunias orientalis		1.617	0.71265	0.329661
Dianthus acicularis		1.8451	0.325519	-0.276541
Dianthus versicolor		1.75051	0.312857	0.164794
Sedum acre		2.30103	0.18117	0.482143
Sedum purpureum		1.80618	0.395672	0.828285
Knautia arvensis		1.58883	0.332438	-0.071427
Lathyrus vernus		1.30103	0.653213	0.104999
Lupinus polyphyllus		1.50379	0.474216	-0.0233566
Origanum vulgare		1.68842	0.25042	0.00144825
Trifolium pratense		1.58883	0.568202	0.207422
Trifolium repens		1.55267	0.558709	0.11138
Herniaria glabra		2.04139	0.31597	0.421323
Betonica officinalis		1.50515	0.40824	0.0273143
Glechoma hederaceae		1.33646	0.719331	0.0558307
Chamaenerion angustifolium		1.5563	0.521138	0.0781715
Plantago media		1.58206	0.262451	-0.0658086
Polygala sibirica		1.84136	0.267138	0.108437
Polygala vulgaris		1.83315	0.375581	0.18447
Polygonum bistorta		1.38021	0.321205	-0.298584
Rumex acetosella		1.82995	0.225309	0.055253
Trientalis europaea		1.3483	0.559907	0.0116931
Adonis vernalis		1.84011	0.448706	0.288814
Anemone sylvestris		1.70586	0.372912	0.0701413
Aquilegia vulgaris		1.53148	0.365488	-0.104312
Caltha palustris		1.44716	0.632457	-0.0665127
Thalictrum simplex		1.64444	0.399674	-0.0388687
Trollius europaeus		1.63043	0.620136	0.253605
Filipendula ulmaria		1.72591	0.271842	-0.126921
Filipendula vulgaris		1.6721	0.278754	-0.169659
Fragaria vesca		1.41497	0.302331	-0.220393
Fragaria viridis		1.71265	0.262451	-0.165276
Potentilla erecta		1.50651	0.348305	-0.301045
Sanguisorba officinalis		1.4843	0.276462	-0.313599
Galium boreale		1.83315	0.311754	0.144909
Galium mollugo		1.41497	0.468886	-0.224255
Galium verum		1.52892	0.146727	-0.324359
Chrysosplenium alternifolium		1.26482	0.376017	-0.322953
Digitalis grandiflora		1.51983	0.334454	-0.254641
Verbascum thapsus		1.46982	0.443338	-0.0578675
Veronica chamaedrys		1.50515	0.247973	-0.376594
Veronica longifolia		1.80482	0.241716	-0.0718878
Veronica spicata		1.89098	0.283301	0.174297
Viola canina		1.52244	0.614897	0.137341
Viola mirabilis		1.233	0.271842	-0.495162
Allium rubens		2.05346	0.235439	0.288889
Allium strictum		1.92012	0.238323	0.459232
Calla palustre		1.51983	0.614897	-0.0178361
Convallaria majalis		1.36922	0.582063	-0.0431883
Maianthemum bifolium		1.41497	0.396199	-0.188827
Polygonatum officinale		1.41996	0.453318	0.00371816
Lilium martagon		1.58995	0.575188	0.16402
Neottianthe cucullata		1.34044	0.58106	-0.0967204
Platanthera bifolia		1.55023	0.419956	-0.0298159
Linnaea borealis		1.47712	0.0530784	-0.260525
Genista tinctoria		1.77815	0.494155	0.423589
Moneses uniflora		1.75587	0.30963	0.0632132
Orthilia secunda		1.93298	0.173186	-0.0330233
Pyrola media		1.68842	0.181844	-0.130627
Pyrola minor		1.52763	0.201397	-0.272264
Pyrola rotundifolia		1.69108	0.161368	-0.148262
Vaccinium myrtillus		1.35793	0.344392	-0.295563
Sparganium erectum		1.73755	0.445666	0.183215
Typha latifolia		2.09665	0.497606	0.594253
Abies lasiocarpa	1.98227	2.40561	0.0128372	0.418445			1.0607	0.465383	0.544068	-0.0565735
Acomastylis rosii	0.30103	1.92445	0.39794	0.322393			2.08063	1.03342	1.32015	0.244599
Arctostaphylos uva-ursi	1.25527	2.10568	0.0899051	0.195589			1.50243	0.643453	0.724276	-0.17004
Bistorta bistortoides	0.30103	1.91721	0.591065	0.508279			2.13354	1.04532	1.45332	0.370533
Picea engelmanii	1.95424	2.48545	0.0128372	0.498289			1.06446	0.550228	0.50515	-0.00669187
Pinus flexilis	1.5563	2.56384	0.049218	0.613055			1.4133	0.988559	0.60206	0.165897
Psychrophila leptosepala	0.39794	1.89963	0.462398	0.362027			2.04139	0.939519	1.18469	0.0843209
Salix glauca	0.477121	1.9108	0.419956	0.330757			2.09447	1.0103	1.24797	0.158775
Salix planifolia	0.477121	1.91009	0.426511	0.336606			2.18013	1.08636	1.39445	0.304547
Vaccinium myrtillus	0.544068	1.767	0.369216	0.13622			2.01912	0.78533	1.02531	-0.20769
Acer rubrum	0.716003	1.79588	0.263636	0.0595161			2.09691	0.886491	1.10721	-0.09691
Eupatorium rugesum	0.681241	1.32883	0.593286	-0.0778868			2.58206	0.835691	1.65031	-0.0208653
Galax aphylla	1.25527	1.90309	-0.05061	-0.14752			1.89209	0.690196	0.986772	-0.110138
Helianthus microcephalus	0.612784	1.60033	0.418301	0.0186276			2.4143	1.02119	1.55388	0.154209
Kalmia latifolia	1.5563	2.02457	0.0606978	0.085266			1.63649	0.681241	0.94939	-0.0260418
Liriodendron tulipifera	0.724276	1.78252	0.350248	0.132764			2.23045	1.0086	1.14613	-0.0713559
Pinus rigida	1.51851	2.31069	0.064458	0.375149			1.74586	1.05308	0.716003	0.0266945
Pinus strobus	1.32222	2.03621	0.130334	0.166546			1.70415	0.775246	0.716003	-0.251981
Podophyllum peltatum	0.477121	1.4908	0.618048	0.1088			2.41664	0.812913	1.42813	-0.0810677
Quercus coccinea	0.755875	1.92812	0.238046	0.166164			2.04532	0.986772	1.0607	-0.0111842
Rhododendron maximum	1.68124	2.31069	-0.0655015	0.24519			1.5302	0.835056	0.579784	-0.109525
Robinia pseudoacacia	0.662758	1.5784	0.636488	0.214884			2.38578	0.973128	1.50515	0.083546
Tsuga canadensis	1.77815	2.08831	-0.00436481	0.083945			1.64246	0.740363	0.491362	-0.420328
Veratrum parviflorum	0.556303	1.52724					2.16137	0.643453	1.26951	-0.203244
Atriplex canescens	0.845098	2.40121	0.322219	0.723429			1.89763	1.233	1.08991	0.491115
Baccharis angustifolia	0.39794	1.97864	0.290035	0.268672			2.29623	1.27184	1.23805	0.216683
Eleagnus angustifolia	0.477121	1.90658	0.599883	0.506461			2.24329	1.14922	1.36922	0.275794
Gutierrezia sarothrae	0.778151	2.46982	0.225309	0.695131			1.77085	1.16732	1.15534	0.625158
Juniperus monosperma	1.89209	2.89279	0.0681859	0.960976			1.06446	0.886491	0.681241	0.574031
Larrea tridentata	1.07918	2.4023	0.287802	0.690107			1.92942	1.26245	0.892095	0.294399
Pinus edulis	1.81954	2.61083	0.0253059	0.63614			1.1038	0.612784
Populus fremontii	0.477121	2.07676	0.220108	0.296864			2.07918	1.15836	1.16435	0.241109
Prosopis glandulosa	0.845098	2.29073	0.396199	0.686929			1.96379	1.25285	0.939519	0.177221
Quercus turbinella	0.90309	2.18046	0.187521	0.367977					1.19312	0.373581
Lyonia lucida	1.29003	2.37572	-0.0362122	0.339506			1.43457	0.794488	0.763428	0.139146
Persea borbonia	1.25527	2.04576	0.214844	0.260601			1.79239	0.827369	0.826075	-0.131421
Pinus palustris	1.50515	2.40671	-0.0861861	0.320528			1.22272	0.594393	0.556303	-0.0369835
Pinus serotina	1.43136	2.44491	-0.0861861	0.358719			1.19866	0.612784	0.69897	0.078374
Pterocaulon pycnostachyum	0.70757	1.90798	0.294466	0.202448			2.00561	0.89098	1.18752	0.0955023
Quercus laevis	0.880814	2.01055	0.0606978	0.071248			1.81823	0.829947	0.799341	-0.190109
Quercus virginia var geminata	1.04139	2.20135	0.187521	0.38887			1.90526	1.1089	0.755875	-0.0427758
Taxodium distichum	0.812913	2.10791	0.075547	0.183452			1.81158	0.919078	1.01284	0.0763883
Vaccinium arboreum	1.04139	2.09637	0.0827854	0.179153			1.72016	0.807535	0.80618	-0.0974525
Vaccinium corymbosum	0.875061	2.00922	0.0899051	0.0991224			1.78247	0.790988	1.1038	0.113021
Aspidosperma album	1.51851	2.08302	0.0293838	0.112404			1.71767	0.812245
Bellucia grossularioides	0.924279	2.10735	0.227887	0.335236			2.04727	1.14551	0.897627	0.00497606
Caraipa heterocarpa	1.58546	2.16877	-0.0315171	0.137253			1.58883	0.758912
Cecropia ficifolia	0.431364	1.83983	0.392697	0.232529			2.40175	1.24797	1.25527	0.0951042
Clidemia sericea	0.70757	1.89825	0.217484	0.115737			2.06258	0.959041
Eperua leucantha	1.64345	2.02182	0.09691	0.118729			1.54531	0.564666
Eperua purpurea	1.63347		0.181844				1.74115
Goupia glabra	1.0569	1.88639	0.178977	0.0653678			1.99564	0.89487
Leguminosae sp	1.69897	2.14206	0.330414	0.472479			1.67852	0.822822
Licania heteromorpha	1.60206	2.17198	0.113943	0.285928			1.73078	0.902003	0.716003	-0.114525
Manihot esculenta	0.176091	1.56051	0.599883	0.160392			2.67015	1.22789	1.52244	0.0829536
Miconia dispar	1.07918	2.04431	0.201397	0.245709			1.96284	1.01242	0.716003	-0.24388
Micrandra sprucei	1.69897	2.23359	0.0334238	0.267011			1.63649	0.870404
Micropholis magueirei	1.70329	2.25727	-0.09691	0.160365
Neea obovata	1.07918	1.98674	0.264818	0.251559			1.81291	0.80618
Ocotea costulata	1.59106	2.11464	0.176091	0.29073			1.65225	0.770115	0.69897	-0.186391
Protium sp1	1.51851	2.06248	-0.0655015	-0.00301944			1.54033	0.605305	0.778151	-0.159367
Protium sp2	1.54407	2.08619	0.247973	0.334159			1.82737	0.912753	0.763428	-0.150386
Protium sp3	1.70757	2.23582	0.0128372	0.248661			1.51851	0.754348
Retiniphyllum truncatum	1.21748	2.08197	-0.167491	-0.0855214			1.66745	0.749736
Rhodognaphalopsis humilis	1.38021	2.12378	-0.107905	0.0158768			1.67394	0.792392
Solanum straminifolia	0.30103	1.54151	0.593286	0.134799			2.57807	1.12937	1.53148	0.0729922
Vismia japurensis	0.838849	1.97716	0.214844	0.192003			2.14737	1.10857	0.968483	-0.0543577
Vismia lauriformis	0.653213	1.94195	0.252853	0.194807			2.20222	1.13925	1.04139	-0.0166535
Acer rubrum	0.740363	1.77989	0.322219	0.102111			2.03342	0.812913	1.09342	-0.126686
Acer saccharum	0.740363	1.90309	0.267172	0.170262			2	0.880814	0.845098	-0.251812
Andromeda glaucophylla	1.11394	2.12057	0.143015	0.263589			1.84696	0.967548
Arisaema triphyllum		1.42022	0.803457	0.223674
Baptisia leucophaea	0.544068	1.97359	0.555094	0.528684			2.2014	1.17493	1.55991	0.533496
Betula nigra	0.716003	1.92812	0.357935	0.286053			2.07188	1
Betula pumilla	0.778151	2.03141	0.178977	0.210385			1.82737	0.858537
Carya ovata	0.748188	1.95078	0.296665	0.247447			1.95904	0.924279
Caulophyllum thalictroides		1.37161	0.764923	0.136534			2.40483	0.770852
Celtis occidentalis	0.740363	1.91721	0.378398	0.295613			2.06819	0.986772
Chamaedaphne calyculata	1.11394	1.93952	0.075547	0.0150662			1.84572	0.78533
Cornus florida	0.748188	1.96658	0.146128	0.112704			1.92942	0.863323
Cornus racemosa	0.778151	1.91009	0.161368	0.0714629			1.97772	0.845098
Dentaria laciniata	0.0413927	1.52724	0.724276	0.251519			2.63548	1.15229
Echinacea purpurea	0.60206	1.8911	0.176091	0.0671881			2.08955	0.989895	1.23553	0.126625
Erythronium americanum	0.278754	1.65365	0.623249	0.276896			2.41996	1.07555	1.716	0.36965
Fraxinus americana	0.755875	1.86012	0.296665	0.156786			2.08279	0.934498
Ilex verticillata	0.778151	1.95713	0.190332	0.14746			1.86213	0.819544
Juglans nigra	0.69897	1.5157	0.471292	-0.0130081			2.24304	0.763428
Juniperus virginiana		2.52288	0.214844	0.737723			1.51851	0.812913
Larix decidua	0.778151	1.85699	0.322219	0.179204			2.0086	0.94939
Larix laricina	0.778151	2.07918	0.155336	0.234517			1.7185	0.826075
Lonicera bella	0.826075	1.92082	0.278754	0.199572			2.07188	0.991226
Picea glauca	1.77815	2.45593	0.0934217	0.549354			1.36173	0.817565	0.60206	0.0579919
Picea mariana	1.77815	2.46852	0.0827854	0.551306			1.5682	0.963788
Pinus banksiana	1.43136	2.38722	0.0934217	0.480638			1.49136	0.878522	0.778151	0.165367
Pinus resinosa	1.5563	2.46852	0.0681859	0.536707			1.38021	0.799341
Pinus strobus	1.32222	2.13077	0.230449	0.361217			1.65321	0.783904	0.672098	-0.197134
Pinus sylvestris	1.43136	2.46852	0.143015	0.611536			1.54407	1.01284	0.792392	0.260913
Podophyllum peltatum	0.477121	1.51004	0.650308	0.160349			2.38739	0.897627
Populus deltoides	0.69897	1.95861	0.372912	0.331519			2.20952	1.17026	1.14613	0.104735
Populus tremuloides	0.69897	1.91721	0.344392	0.261607			2.15229	1.07555	1.3483	0.265519
Prunus serotina	0.740363	2.00436	0.31597	0.320335			2.09691	1.06819
Quercus ellipsoidalis	0.778151	2.02228	0.322219	0.344496			2.09691	1.12057	1.11727	0.139548
Quercus macrocarpa	0.778151	1.9431	0.371068	0.314163			2.17435	1.13354
Rhamnus cathartica	0.832509	1.9393	0.361728	0.30103			2.13033	1.04139
Sanguinaria canadensis	0.60206	1.49349	0.729165	0.22266			2.40654	0.897627	1.81291	0.306408
Sarracenia purpurea	1.47712	2.10721	0.0569049	0.164115			1.35793	0.465383
Silphium integrifolium	0.60206	1.9345	0.220108	0.154607			2.06446	1	1.28103	0.215532
Silphium terebinthinaceum	0.477121	1.87615	0.158362	0.0345109			2.24304	1.12872	1.24551	0.121661
Thuja occidentalis	1.68124	2.3483	-0.119186	0.229118			1.50515	0.857332
Trillium grandiflora	0.568202	1.44733	0.71265	0.159981			2.32015	0.763428
Ulmus americana	0.763428	2.07572	0.285557	0.361278			2.06446	1.13988
Acer negundo		1.56864	0.39794	-0.0334238	-0.769551	-1.20091
Acer pensylvanicum		1.47756	0.278754	-0.420216	-0.568636	-1.26761
Acer rubrum		1.88606	0.30103	0.187087	-0.721246	-0.83519
Acer saccharum		1.67162	0.342423	0.0140431	-0.552842	-0.881222
Rhus typhina		1.81816	0.491362	0.309518	-0.408935	-0.590779
Alnus rugosa		1.77728	0.477121	0.254405	-0.657577	-0.880294
Betula alleghaniensis		1.66354	0.342423	0.00596295	-0.769551	-1.10601
Betula papyrifera		1.86328	0.342423	0.205702	-0.677781	-0.814501
Carpinus caroliniana		1.73283	0.30103	0.0338583	-0.744727	-1.0119
Ostrya virginiana		1.56864	0.342423	-0.0889411	-0.60206	-1.03342
Cornus alternifolia		1.60206	0.230449	-0.167491	-0.958607	-1.35655
Fagus grandifolia		1.73283	0.322219	0.0550476	-0.769551	-1.03672
Quercus alba		1.68194	0.342423	0.0243593	-0.677781	-0.995844
Quercus rubra		1.73993	0.255273	-0.00479888	-0.69897	-0.959041
Quercus macrocarpa		1.98297	0.322219	0.305186	-0.721246	-0.73828
Carya cordiformis		1.64397	0.414973	0.0589475	-0.49485	-0.850876
Carya ovata		1.7167	0.342423	0.0591215	-0.638272	-0.921573
Juglans cinerea		1.78516	0.414973	0.200129	-0.408935	-0.623779
Fraxinus americana		1.81816	0.322219	0.140376	-0.455932	-0.637776
Fraxinus nigra		1.85699	0.322219	0.179204	-0.920819	-1.06383
Fraxinus pennsylvanica		1.9431	0.255273	0.198368	-0.677781	-0.734686
Prunus serotina		1.77728	0.431364	0.208647	-0.853872	-1.07659
Prunus pennsylvanica		1.69897	0.380211	0.0791812	-0.69897	-1
Prunus virginiana		1.92445	0.447158	0.371611	-0.920819	-0.996366
Malus sp		1.8962	0.39794	0.294136	-0.853872	-0.957676
Populus balsamifera		1.85078	0.30103	0.151811	-0.537602	-0.686821
Populus deltoides		1.85078	0.380211	0.230992	-0.638272	-0.787491
Populus grandidentata		1.7986	0.39794	0.196543	-0.619789	-0.821186
Populus tremuloides		1.8962	0.414973	0.31117	-0.619789	-0.723592
Salix nigra		1.74715	0.39794	0.145087	-0.886057	-1.13891
Tilia americana		1.73993	0.477121	0.21705	-0.431798	-0.69187
Ulmus americana		1.79317	0.380211	0.173385	-0.638272	-0.845098
Ulmus rubra		1.77728	0.39794	0.175224	-0.744727	-0.967444
Ulmus thomasii		1.80688	0.361728	0.168603	-0.468521	-0.661646
Acacia mimula		2.26962	0.378216	0.647838
Buchanania obovata		2.11805	0.243658	0.361703
Erythrophleum chlorostachys		1.96344	0.373157	0.336595
Eucalyptus clavigera		2.26761	0.0843379	0.351944
Eucalyptus miniata		2.25959	0.0460447	0.305638
Eucalyptus porrecta		2.10888	0.0892868	0.198168
Eucalyptus tectifica		2.11957	0.203848	0.323416
Eucalyptus tetradonta		2.34668	-0.0417302	0.30495
Livistona humilis		2.37212	0.0525016	0.424624
Planchonia careya		2.05306	0.308564	0.361621
Xanthostemon paradoxus		2.11126	0.171141	0.2824
Acacia dimidiata		2.30016	0.333649	0.633811
Buchanania obovata		2.20761	0.0640834	0.271692
Eucalyptus bleeseri		2.35952	-0.0452752	0.314243
Eucalyptus conferiflora		2.14752	0.0696681	0.217188
Eucalyptus miniata		2.32698	0.0392819	0.366261
Eucalyptus tectifica		2.32057	0.0301948	0.350767
Eucalyptus tetrodonta		2.40506	-0.0346807	0.370375
Grevillea pyramidalis		2.98716	-0.253366	0.537621
Lysiphyllum cunninghamii		2.15927	0.185542	0.344809
Petalostigma quadriloculare		2.30627	-0.162412	0.143861
Planchonia careya		2.20482	0.257918	0.462734
Acacia holosericea		2.44612	0.289589	0.735706
Carissa lanceolata		2.34969	0.108565	0.458258
Eucalyptus brevifolia		2.4681	-0.0858332	0.382262
Eucalyptus pruinosa		2.38265	0.0265333	0.409183
Eucalyptus pruinosa		2.34775	0.122216	0.46997
Eucalyptus tectifica		2.42174	0.0398106	0.461553
Eucalyptus terminalis		2.41266	-0.0455967	0.367067
Hakea arborescens		2.6038	-0.247184	0.356617
Lysiphyllum cunninghamii		2.14388	0.119586	0.263461
Melaleuca sp		2.78252	0.0103	0.792816
Cochlospermum fraseri		2.06651	0.149219	0.215732
Cycas armstrongii		2.16685	0.323046	0.489899
Erythrophleum chlorostachys		2.00524	0.362294	0.367537
Eucalyptus miniata		2.29814	0.0402066	0.338351
Eucalyptus nesophilla		2.20204	0.103633	0.305673
Eucalyptus tetrodonta		2.34135	0.0400746	0.381427
Livistona humilis		2.30277	0.243038	0.545809
Persoonia falcata		2.31876	-0.138466	0.180293
Eucalyptus brevifolia		2.46471	-0.0449138	0.419792
Eucalyptus terminalis		2.45346	0.0138901	0.467347
Grevillea dimidiata		2.52288	-0.111821	0.411058
Hakea leucoptera		3.16749	-0.272459	0.698856
Lysiphyllum cunninghamii		1.99827	0.390759	0.389025
Terminalia arostrata		2.35655	0.0285713	0.385119
Terminalia canescens		2.28316	-0.0186345	0.264528
Ventilago viminalis		2.68194	0.176381	0.858317
Agrimonia gryposepala		1.68613
Asclepias syriaca		1.73518
Aster acuminatus		1.34104
Brassica oleracea		1.45593
Centaurea nigra		1.82681
Chrysanthemum leucanthemum		1.767
Cichorium intybus		1.75696
Dactylis glomerata		1.65561
Epilobium glandulosum		1.59176
Epipactis helleborine		1.42713
Erigeron strigosus		1.46597
Galeopsis tetrahit		1.64397
Hieracium scabrum		1.33255
Hypericum perforatum		1.61439
Impatiens capensis		1.2652
Lobelia inflata		1.39469
Lythrum salicaria		1.78516
Maianthemum canadense		1.46218
Melilotus alba		1.72125
Oenothera blennis		1.71444
Oenothera perennis		1.31247
Oxalis stricta		1.23882
Phleum pratense		1.75945
Plantago major		1.72125
Polygonum persicaria		1.67778
Potentilla simplex		1.50307
Prunella vulgaris		1.42251
Pyrola elliptica		1.6968
Rudbeckia hirta		1.83565
Solidago canadensis		1.66756
Sonchus arvensis		1.6925
Spiraea tomentosa		1.75449
Trifolium pratense		1.72354
Veronica officinalis		1.5817
Acer rubrum	0.778151	1.84662	0.324282	0.170905	-1.03152	-1.1849	1.92766	0.774287
Alnus rugosa	0.778151	1.9576	0.403121	0.360717	-0.995679	-1.0381	2.03576	0.99336
Andromeda glaucophylla	1.25527	2.37278	0.0569049	0.429689	-1.20066	-0.8279	1.83806	1.21084
Aronia melanocarpa	0.778151	1.98842	0.240549	0.228973	-0.856985	-0.8686	2.09624	1.08467
Betula populifolia	0.778151	1.76675	0.252853	0.0195997	-1.02228	-1.2555	2.08849	0.855232
Betula pumila	0.778151	1.93263	0.257679	0.190311	-0.978811	-1.0462	1.88086	0.813494
Chamaedaphne calyculata	1.25527	2.07258	0.133539	0.206116	-1.09691	-1.0243	2.19748	1.27006
Comptonia peregrina	0.778151	1.87539	0.344392	0.219785	-1.11351	-1.2381	2.21887	1.09426
Gaylussacia baccata	0.778151	1.82961	0.220108	0.049714	-1.08092	-1.2513	2.09448	0.924087
Ilex verticillata	0.778151	1.71656	0.403121	0.119685	-1.01323	-1.2967	2.1661	0.882662
Kalmia angustifolia	1.25527	2.07816	0.0863598	0.16452	-1.14267	-1.0645	1.85561	0.933775
Kalmia polifolia	1.25527	2.15431	0.113943	0.268251	-1.1549	-1.0006	2.19591	1.35022
Larix laricina	0.778151		0.10721		-1.09691		1.82308
Ledum groenlandicum	1.25527	2.05212	0.149219	0.201337	-1.0655	-1.0134	2.01693	1.06905
Nemopanthus mucronata	0.778151	1.79696	0.209515	0.00647492	-1	-1.203	2.02735	0.824311
Picea glauca	1.47712		0.149219		-0.987163		1.68276
Picea mariana	1.47712		0.00860017		-1.0655		1.43572
Pinus strobus	1.25527		0.0863598		-1.00877		1.55382
Populus tremuloides	0.778151	1.96112	0.287802	0.248923	-1.05061	-1.0895	1.93949	0.900606
Rubus hispidus	0.778151	1.84044	0.305351	0.145791	-0.910095	-1.0697	2.18225	1.02269
Salix fragilis	0.778151	1.98219	0.424882	0.407072	-0.623423	-0.6412	1.99558	0.977772
Sarracenia purpurea	1.47712	1.94503	0.0374265	-0.0175463	-1.07058	-1.1256	1.47326	0.418284
Spiraea alba	0.778151	1.90945	0.318063	0.227512	-0.950782	-1.0413	2.1661	1.07555
Spiraea tomentosa	0.778151	1.87642	0.269513	0.145929	-0.725842	-0.8494	2.20848	1.08489
Thuja occidentalis	1.25527		0.10721		-0.89279		1.5112
Ulmus americana	0.778151	1.85557	0.287802	0.143375	-0.844664	-0.9891	1.88766	0.743235
Vaccinium myrtilLoides	0.778151	1.94774	0.187521	0.135258	-1.1549	-1.2072	2.09205	1.03979
Viburnum cassinoides	0.778151	1.94248	0.318063	0.260546	-0.974694	-1.0322	1.91618	0.858662
Beureria cumanensis	0.929419	1.93554	0.458133	0.393675			2.06009	0.995635
Capparis verrucosa	1.07918	2.05061	0.49912	0.54973			1.78824	0.838849
Capparis aristiguetae	1.07918	2.16115	0.345502	0.506653			1.70217	0.863323
Coursetia arborea	0.778151	1.57187	0.498335	0.0702001			2.26698	0.838849
Lonchocarpus dipteroneurus	0.845098	1.61618	0.610519	0.226704			2.35694	0.973128
Mansoa verrucifera	0.778151	1.75696	0.433624	0.190586			2.01389	0.770852
Memora sp	1.04139	2.10791	0.311302	0.419208			1.76716	0.875061
Morisonia americana	1.07918	2.16749	0.418122	0.585613			1.73014	0.897627
Pithecellobium dulce	0.929419	1.82102	0.413197	0.23422			2.12837	0.94939
Pithecellobium ligustrinum	0.977724	1.81248	0.543742	0.356221			2.15131	0.963788
Aspidosperma album		2.26761	0.158061	0.414973	-1.11919	-0.853872
Catostemma sp		2.3279	0.0153598	0.342423	-1.17393	-0.853872
Clusia sp		2.3279	0.0374265	0.361728	-1.27572	-0.958607
Heteropteris sp		2.22185	0.148294	0.361728	-1.24413	-1.04576
Hirtella punctillata		2.31876	-0.274905	0.045323	-1.50864	-1.1549
Humiria balsamifera		2.30103	-0.161151	0.139879	-1.36653	-1.04576
Macairea rufescens		2.35655	-0.107349	0.255273	-1.56864	-1.22185
Mouriri incitheca		2.56864	-0.357535	0.20412	-1.65758	-1.09691
Ocotea esmereldana		2.25964	-0.0996329	0.0413927	-1.23657	-1
Remijia morilloi		2.55284	-0.388277	0.176091	-1.5376	-1
Retiniphyllum concolor		2.21467	-0.0931265	0.113943	-1.4437	-1.22185
Rodognaphalopsis discolor		2.56864	-0.223299	0.342423	-1.46852	-0.886057
Allocasuarina pusilla		2.58503	0.0253059	0.610333	-1.33724	-0.752216
Banksia marginata		2.34679	-0.200659	0.146128	-1.92082	-1.57403
Banksia ornata		2.42022	-0.173925	0.246291	-1.79588	-1.37566
Calytrix alpestris		2.67778	0.0170333	0.694814	-1.34679	-0.669007
Hibbertia riparia		2.27572	0.0334238	0.309148	-1.3279	-1.05218
Hibbertia sericea		2.67778	0.0211893	0.69897	-1.34679	-0.669007
Hypolaena fastigiata		2.67778	-0.259637	0.418143	-2.09691	-1.41913
Lepidosperma carphoides		2.63827	-0.244125	0.394147	-1.72125	-1.08297
Lepidosperma laterale		2.63827	-0.130768	0.507504	-1.55284	-0.91457
Phyllota remota		2.25181	0.155336	0.407148	-1.18046	-0.928644
Xanthorrhoea australis		2.74473	-0.327902	0.416825	-1.85387	-1.10914
Baeckea crassifolia		2.5376	-0.0268721	0.51073	-1.40894	-0.871333
Eucalyptus foecunda		2.52288	-0.00436481	0.518514	-1.284	-0.761118
Eucalyptus incrassata		2.65758	-0.107905	0.549672	-1.5376	-0.880025
Hakea muellerana		2.49485	-0.267606	0.227244	-1.74473	-1.24988
Lepidosperma laterale		2.58503	-0.346787	0.238239	-1.88606	-1.30103
Melaleuca uncinata		2.65758	0.09691	0.754487	-1.25181	-0.594235
Banksia marginata		2.17393	-0.0705811	0.103344	-1.46852	-1.2946
Eucalyptus baxteri		2.39794	-0.0861861	0.311754	-1.48149	-1.08355
Eucalyptus obliqua		2.35655	-0.0268721	0.329675	-1.33724	-0.980695
Lepidosperma semiteres		2.65758	-0.259637	0.39794	-1.74473	-1.08715
Leptospermum myrsinoides		2.17393	0.0334238	0.207349	-1.3279	-1.15398
Adinandra dumosa		2.04096					1.95424	0.996512	0.992465	0.0334238
Dillenia suffruticosa		1.93181					2.16732	1.10037	1.02243	-0.0457575
Melastoma malabathricum		1.88606					2.17319	1.0607	0.838219	-0.275724
Macaranga heynei		1.82681					2.14613	0.974512	0.872156	-0.30103
Mallotus paniculatus		1.82974					2.31806	1.14613	1.15703	-0.0132283
Trema tomentosa		1.69037					2.31387	1.00432	1.25411	-0.0555173
Aconogonon campanulatum		1.71158	0.631626	0.342338			2.37193	1.08398
Anemone rupicola		1.91265	0.413691	0.326373			2.03841	0.951014
Athylium wallichianum		1.93936	0.496805	0.436473			1.89188	0.832509
Bistorta amplexicaulis		1.67637	0.581525	0.27029			2.33597	1.03208
Cremanthodium pinnatifidum		1.52672	0.620094	0.15076			2.44361	0.974665
Lagotis kunawarensis		1.7693	0.555826	0.343443			2.41244	1.18752
Picrorhiza scrophulariiflora		1.69983	0.588698	0.293599			2.43613	1.13883
Potentilla contigua		1.75429	0.477723	0.232798			2.30401	1.05817
Potentilla peduncularis		1.88822	0.403794	0.295657			2.19478	1.08517
Rheum acuminatum		1.57241	0.68287	0.274622			2.40731	0.992701
Rheum nobile		1.78195	0.54285	0.358493			2.21488	1.036
Rhododendron anthopogon		2.24351	0.310633	0.554112			1.52331	0.768391
Salix anticecrenata Monadelpha		1.9257	0.476911	0.40651			2.03859	0.963788
Saussurea gossypiphora		1.83858	0.492977	0.332735			2.42411	1.26324
Swertia acaulis		1.80381	0.386778	0.190455			2.18612	0.983777
Ipomoea carnea								1.14613
Jatropha gossypifolia								1.17609
Alternanthera crucis								1.62325
Prosopis juliflora								0.845098
Capparis odoratissima								0.845098
Achillea millefolium		1.88606	0.40824	0.303196			2.42144	1.3075	1.24304	0.409933
Agastache foeniculum		1.96658	0.436163	0.416641			2.25873	1.22531
Agropyron repens	0.237048	1.79048	0.390935	0.201397			2.59512	1.38561	1.13033	-0.0655015
Agrostis scabra		1.92812	0.190332	0.155336			2.57294	1.50106	1.50515	0.146128
Ambrosia artemisiifolia	0.1749	1.88941	0.40654	0.298853			2.54834	1.43775	1.41664	0.190332
Andropogon gerardi	0.37902	1.9914	0.0934217	0.09691			2.48136	1.47276	1.13354	-0.0362122
Anemone cylindrica	0.321028	1.97062	0.220108	0.193125			2.2169	1.18752	1.10721	0.139879
Asclepias syriaca	0.147316	1.8041	0.434569	0.245513			2.45358	1.25768	1.44871	0.178977
Asclepias tuberosa		1.91721	0.32838	0.245513			2.13586	1.05308	1.27646	0.117271
Aster azureus		2.00877	0.20412	0.222716			2.12476	1.13354	1.24055	0.117271
Aster ericoides		2.10791	0.25042	0.367356			2.19959	1.3075	1.30103	0.09691
Aster novaeanglieae		1.81816	0.382017	0.206826			2.36082	1.17898
Astragalus candensis		1.97469	0.61595	0.596597			2.43693	1.41162	1.31806	0.0934217
Bouteloua curtipendula		2.02228	0.049218	0.10721			2.41389	1.43616	1.19033	0.0681859
Calamovilfa longifolia		2.13668	0.245513	0.432969			2.35887	1.49554	1.1038	0.075547
Coreopsis palmata		2.18046	0.0681859	0.247973			1.85297	1.03342	1.0607	0.0334238
Corylus americanus		2.02228	0.303196	0.33646			2.17085	1.19312	1.00432	-0.091515
Desmodium canadense	0.387292	1.80134	0.369216	0.173186			2.28144	1.08279	1.20412	-0.130768
Koeleria cristata	0.49232	2.13668	0.201397	0.346353			2.27326	1.40993	1.25527	0.587711
Lespedeza capitata	0.194495	2.00877	0.324282	0.334454			2.17307	1.18184	1.18752	0.0863598
Liatris aspera		2.10791	0.212188	0.326336			2.08522	1.19312	1.04532	0.064458
Lupinus perennis	-0.0252297	1.81248	0.552668	0.378398			2.50767	1.32015	1.31806	0.283301
Panicum capillare		1.82102	0.25042	0.075547			2.32199	1.14301
Panicum virgatum		1.98716	0.206826	0.217484			2.5139	1.50106	1.06446	-0.119186
Penstemon grandiflorus		1.97881	0.324282	0.307496			2.3753	1.35411	1.20412	0.225309
Petalostemum purpureum		2.12494	0.385606	0.559907			2.43854	1.56348
Petalostemum villosum		2.04576	0.421604	0.480007			2.43569	1.48144	1.24551	0.342423
Poa pratensis	0.479258	2.00436	0.220108	0.260071			2.47851	1.48287	1.2833	0.540329
Potentilla arguta		1.97881	0.276462	0.260071			2.2307	1.20952	1.11727	-0.0222764
Quercus macrocarpa		1.97469	0.372912	0.354108			2.2267	1.2014	1.24797	0.225309
Rudbeckia serotina	0.188061	1.85387	0.330414	0.184691			2.45576	1.30963	1.17319	0.0863598
Schizachyrium scoparium	0.37902	1.82102	0.0170333	-0.161151			2.42449	1.24551	1.08636	0.00860017
Solidago nemoralis		2.08619	0.198657	0.287802			2.14681	1.233	1.16435	0.130334
Solidago rigida	0.479258	2.0655	0.103804	0.173186			2.10768	1.17319	1.11394	0.178977
Sorghastrum nutans	0.291405	1.98297	0.143015	0.139879			2.49125	1.47422	1.1038	0.0211893
Stipa spartea		2.14874	0.257679	0.426511			2.39657	1.54531	1.03743	0.439333
Avicennia alba		2.18243
Avicennia lanata		2.31695
Bruguiera cylindrica		2.05799
Ceriops tagal		2.27572
Lumnitzera littorea		2.3851
Rhizophora apiculata		2.30539
Rhizophora mucronata		2.2815
Scyphiphora hydrophyllacea		2.19111
Sonneratia alba		2.20831
Cerbera manghas		1.8986
Hibiscus tiliaceus		2.00966
Planchonella obovata		2.03527
Scaevola taccada		1.87648
Tarenna fragrans		1.9838
Terminalia catappa		1.87063
Thespesia populnea		1.86044
Tristaniopsis whiteana		2.12726
Adinandra dumosa		2.23732
Eugenia spicata		2.02091
Fagraea fragrans		1.9594
Melastoma malabathricum		1.99439
Myrica esculenta		2.07831
Rhodamnia cinerea		2.13847
Arthrophyllum diversifolium		1.92885
Claoxylon indicum		1.71534
Commersonia bartramia		1.79534
Ficus fistulosa		1.97062
Ficus grossularioides		1.90413
Ixonanthes reticulata		2.13966
Ixora congesta		2.12843
Macaranga heynei		1.89928
Macaranga hypoleuca		1.95039
Mallotus paniculatus		1.7693
Sapium discolor		1.84802
Trema cannabina		1.86107
Trema tomentosa		1.87582
Vitex pinnata		1.9987
Adenanthos cygnorum	1.60163	2.36654	-0.103474	0.263069			1.81923	1.14014	0.639645	0.00618729
Andersonia heterophylla	1.03342	2.41255	-0.0268721	0.385674			1.55348	0.925848	1.08072	0.493266
Astroloma xerophyllum	0.936514	2.34858	-0.00877392	0.339807			1.69143	0.988413	0.855397	0.203979
Banksia attenuata	1.47363	2.45381	-0.0899095	0.363899			1.99627	1.41828	0.801692	0.2555
Banksia menziesii	1.58024	2.509	-0.0958256	0.413175			1.79554	1.26808	0.74907	0.258071
Bossiaea eriocarpa	1.21272	2.30452	0.276002	0.580525			1.96499	1.27492	0.963357	0.26788
Calytrix flavescens	1.43902	2.3782	0.0111474	0.389351			1.72205	1.15753	0.884768	0.262972
Conostephium pendulum	1.43329	2.3349	-0.0400052	0.294892			1.6999	1.04162	0.921729	0.256626
Eremaea pauciflora	1.14737	2.29864	0.0633334	0.361969			1.77522	1.15042	0.95548	0.254116
Hibbertia huegelii	1.16909	2.26193	0.0425755	0.304505			1.87368	1.10987	0.768695	0.0306239
Hibbertia subvaginata	1.23452	2.39087	0.120245	0.511119			1.88597	1.25014	0.871836	0.262711
Jacksonia floribunda	1.52166	2.49381	0.205475	0.699282			1.82319	1.29969	0.924365	0.418172
Leucopogon conostephioides	1.14737	2.19595	0.0441476	0.240099			1.65203	0.812759	1.04496	0.240913
Lyginia barbata	1.65896	2.8303	-0.146302	0.684001			1.50474	1.30528	0.599396	0.429699
Macrozamia riedlei	2.02366	2.46294	0.237795	0.700731			1.57993	1.06924	0.520669	-0.0163956
Melaleuca acerosa	1.39305	2.52185	-0.0705811	0.451266			1.71052	1.20987	0.908402	0.43025
Nuytsia floribunda	1.45393	2.6621	-0.118615	0.543483			1.51117	1.10825	0.688054	0.350153
Patersonia occidentalis	1.45939	2.57889	-0.0639892	0.514902			1.66029	1.19246	0.69697	0.275861
Persoonia saccata	1.47188	2.66492	-0.14813	0.516792			1.65319	1.28496	0.724622	0.389545
Petrophile linearis	1.61951	2.7361	-0.20621	0.529888			1.61233	1.34159	0.793729	0.529826
Regelia ciliata	1.27508	2.18837	0.0523091	0.240682			1.93332	1.16559	0.979256	0.167628
Scholtzia involucrata	1.37365	2.24919	0.115278	0.364469			1.89787	1.167	1.00437	0.253561
Stirlingia latifolia	1.45939	2.46303	-0.0329203	0.430112			1.78676	1.21877	0.855979	0.319011
Verticordia nitens	1.26387	2.52053	0.0503798	0.570909			1.75996	1.32984	0.78421	0.304739
Xanthorrhoea preissii	1.38021	2.87149	-0.0979971	0.773495			1.39498	1.26241	0.494366	0.365858
Anigozanthos humilis	0.597695	1.76096	0.549739	0.310696			2.55234	1.31032
Drosera sp	0.597695	1.69597	0.173478	-0.130548			1.99196	0.677871
Gladiolus caryophyllaceus	0.597695	1.94054	0.279211	0.219754			2.27567	1.20847
Pterostylis sp	0.597695	1.57234	0.363424	-0.0642314			2.18291	0.765798
Stylidium sp	0.597695	2.05052	0.262214	0.312734			1.97741	0.961291
Apollonias barbujana		2.15079	0.104658	0.255445
Arbutus canariensis		2.1567	0.0931757	0.249876
Erica arborea		2.11915	0.092896	0.212051
Erica scoparia		2.1095	0.139879	0.24938
Heberdenia bahamensis		2.05354	-0.0319843	0.0215551
Ilex canariensis		2.19772	-0.0579919	0.13973
Ilex platyphylla		2.14706	0.130334	0.277391
Laurus azorica		2.11025	0.0993353	0.209588
Maytenus canariensis		2.07214	0.192006	0.264145
Myrica faya		1.97667	0.317436	0.294107
Ocotea foetens		2.041	0.321702	0.3627
Persea indica		2.07496	0.184691	0.259654
Picconia excelsa		2.24217	0.133539	0.375707
Prunus lusitanica		2.11244	0.240549	0.352987
Rhamnus glandulosa		2.09223	0.218668	0.310897
Salix canariensis		1.78089	0.499756	0.280649
Viburnum rigidum		2.15375	0.106701	0.260455
Visnea mocanera		2.14333	0.0129936	0.156321
Adenocarpus foliolosus		1.99926	0.589903	0.589164
Argyranthemum spp.		2.14211	0.0537674	0.195875
Bupleurum salicifolium		2.14724	0.334504	0.481748
Chamaecytisus proliferus		2.33439	0.108677	0.44307
Cistus monspeliensis		2.1813	0.485119	0.666419
Cistus simphytifolius		2.2179	0.176936	0.394841
Daphne gnidium		2.202	0.210334	0.412332
Dorycnium spectabile		1.9058	0.563558	0.469354
Hypericum reflexum		2.03973	0.00745716	0.0471885
Jasminum odoratisimum		2.18924	0.306393	0.495631
Juniperus phoenicea		2.19909	-0.075204	0.123887
Olea europaea		2.29314	0.250361	0.543502
Pinus canariensis		1.83754	0.095035	-0.0674214
Rumex lunaria		1.97025	0.331279	0.301533
Alnus rhombifolia		1.9861	0.352665	0.338764
Quercus lobata		2.11767	0.311224	0.428893
[truncated: 549 more rows]

## Sheet: growth forms
Species	Growth forms	log LL	log LMA	log Nmass	log Pmass	log Amass	log Rdmass
Adenostoma fasciculatum	Shrub	1.25527	2.454	0.069	-0.9323	1.691
Arbutus menziesii	Shrub	1.17153	2.188	0.094	-0.923	1.861
Arctostaphylos tomentosa	Shrub	1.347	2.145	0.014	-0.993527	1.876
Artemisia californica	Shrub		1.979
Baccharis pilularis	Shrub	0.951338	2.031	0.388	-0.8241	2.208
Ceanothus cuneatus	Shrub	1.16691	2.356	0.255	-0.9617	2.002
Ceanothus oliganthus	Shrub	1.03663	2.081	0.328	-0.826	2.173
Cercocarpus betuloides	Shrub	1.06868	2.138	0.382	-0.6916	2.249
Dirca occidentalis	Shrub	0.597939	1.754	0.412	-0.7608	2.13
Eriodictyon californicum	Shrub	0.957687	2.251	0.222	-0.8045	2.017
Heteromeles arbutifolia	Shrub	1.35817	2.315	0.137	-0.8794	1.774
Holodiscus discolor	Shrub	0.661392	1.894	0.288	-0.7202	2.207
Lepechinia calycina	Shrub	0.64453	2	0.259	-0.9224	2.098
Lotus scoparius	Shrub	0.301319	1.984	0.361	-0.8034	2.35
Mimulus aurantiacus	Shrub	0.876417	2.049	0.063	-0.9212	2.089
Pickeringia montana	Shrub		2.181
Prunus iIlicifolia	Shrub	1.21678	2.178	0.311	-0.8474	1.805
Quercus agrifolia	Shrub		2.292
Quercus durata	Shrub		2.322
Rhamnus californica	Shrub	1.18593	1.869	0.318	-0.689	2.163
Rhamnus crocea	Shrub	1.13349	2.1	0.328	-0.871	1.995
Ribes californicum	Shrub	0.516557	1.967	0.349	-0.8753	2.072
Ribes malvaceum	Shrub		1.874
Sambucus mexicana	Shrub	0.624545	1.999	0.404	-0.7476	2.28
Solanum umbelliferum	Shrub		1.903
Toxicodendron diversiloba	Shrub	0.615523	1.901	0.296226	-0.702421	2.218
Cheirodendron tryginum	Tree		1.95202	0.075547	-1.04576	1.77948
Chenopodium oahuense	Shrub		1.95269	0.559907	-0.552842	2.21493
Comprosma ochracea	Tree		1.89671	0.11059	-1.1549	2.1052
Meterosideros polymorpha pb	Tree		2.49026	-0.136677	-2	1.16024
Myoporum sandwicensis	Tree		2.16775	0.11059	-0.79588	2.00494
Myrsine lessertiana	Tree		2.19294	-0.0177288	-1.39794	1.67128
Pelea sp	Tree		1.81899	0.113943	-1.52288
Rhus sandwicensis	Tree		1.68296	0.146128	-1.09691	2.5332
Rubus hawaiiensis	Shrub		1.56366	0.469822	-0.657577
Sophora chrysophylla	Tree		2.06018	0.460898	-0.823909	1.82856
Styphelia tameiameiae	Shrub		2.31301	-0.0861861	-2
Vaccinium chalicinum	Shrub		1.72774	0.298853	-0.657577	1.98381
Vaccinium reticulatum	Shrub		2.22863	-0.05061	-2
Dodonaea viscosa	Shrub		2.16134	0.146128	-0.853872
Dubautia scabra	Shrub		1.82472	-0.091515	-1.52288
Meterosideros polymorpha pb	Tree		2.2898	-0.0655015	-1.39794	1.69198
Meterosideros polymorpha gl	Tree		2.15181	-0.0655015	-1.30103
Meterosideros polymorpha pb	Tree		2.24803	-0.0604807	-1.22185	1.79301
Myrsine sandwicensis	Shrub		1.66322	0.0211893	-1.30103
Pipturus albidus	Tree		1.79161	0.20412	-1.09691	2.35628
Psychotria sp	Shrub		1.846	0.117271	-1.09691	1.44559
Brussaisia arguta	Shrub		1.86299	0.127105	-1	1.65657
Clermontia montes-loa	Shrub		1.509	0.454845	-0.886057	1.67313
Freycinetia arborea	Herb		1.78479	0.281033	-1	1.58794
Ilex anomala	Tree		1.9828	0.0934217	-1.39794
Meterosideros polymorpha gl	Tree		2.03863	0.045323	-1.1549	1.47725
Meterosideros polymorpha pb	Tree		2.30803	-0.113509	-1.69897	1.27403
Peperomia sp	Herb		1.57104	0.338456	-0.920819
Comprosma ernodeoides	Shrub		1.90504	-0.00436481	-1.22185
Comprosma ochracea	Shrub		1.60121	0.243038	-1.1549	1.50938
Hedyotis centranthoides	Shrub		2.09093	0.103804	-1.39794	1.48078
Meterosideros polymorpha gl	Tree		2.19729	-0.107905	-1.39794	1.4588
Meterosideros polymorpha pb	Tree		2.56004	-0.229148	-1.69897	1.26717
Betula papyrifera	Tree		1.99564	0.402313		2.29003
Prunus serotina	Tree		1.74819	0.427908		2.51851
Fraxinus americana	Tree		1.96377	0.358449		2
Quercus rubra	Tree		2.04139	0.405773		2.33041
Quercus alba	Tree		2.00436	0.527114		2.35793
Castanea dentata	Tree		1.76344	0.412662		2.33646
Ulmus americana	Tree		1.8129	0.301052		2.29667
Acer rubrum	Tree		2.02118	0.234087		2.08991
Acer saccharum	Tree		2.0086	0.221857		1.83251
Acer pensylvanicum	Tree		1.77086	0.405244		2.22531
Acalypha skutchii	Tree		1.41347	0.412124	-0.672233
Aegiphila costaricensis	Tree		1.63438	0.190892	-0.673562
Allophylus camptostachys	Tree		2.03165	0.0526939	-0.892112
Amphitecna tuxtlensis	Tree		1.93178	0.15412	-0.953895
Astrocaryum mexicanum	Tree		1.87364	0.222456	-0.79833
Bactris trichophylla	Shrub		1.73884	0.186956	-0.968592
Brosimum alicastrum	Tree		1.80315	0.328787	-0.885056
Bursera simaruba	Tree		1.92905	0.179552	-0.997402
Capparis baducca	Tree		1.74861	0.213252	-0.998699
Casearia sylvestris	Tree		1.79817		-1.07391
Cecropia obtusifolia	Tree		1.89416	0.343999	-0.914397
Chamaedorea alternans	Tree		1.6205	0.0802656	-0.850012
Chamaedorea pinnatifrons	Tree		1.61203	0.246745	-0.684135
Clarisia biflora	Tree		2.03194	0.322219	-0.94424
Coccoloba hondurensis	Tree		2.0159		-1.03152
Cordia megalantha	Tree		1.93354	0.329398	-0.863755
Croton schiedeanus	Tree		1.81772	0.282169	-0.813892
Cupania dentata	Tree		2.06072	0.17667	-1.01592
Cymbopetalum baillonii	Tree		2.04286	0.119256	-0.677781
Cynometra retusa	Tree		2.10574	0.071882	-1.02641
Dendropanax arboreus	Tree		1.9713	-0.047692	-0.85855
Dialium guianense	Tree		1.92058	0.227372	-0.930887
Dussia mexicana	Tree		1.91561	0.199755	-0.874031
Erythrina folkersii	Tree		1.68629	0.443732	-0.820448
Faramea occidentalis	Tree		1.93988	0.091667	-1.08302
Ficus tecolutensis	Tree		2.12046		-1.07109
Ficus yoponensis	Tree		2.01927	0.236789	-0.899285
Guamia LT sp1	Tree		1.65701	0.24005	-0.910978
Guarea glabra	Tree		2.06277	0.243038	-0.976953
Guarea grandifolia	Tree		2.0037	0.203577	-0.743162
Hampea nutricia	Tree		1.78634	0.323458	-0.710077
Heliocarpus appendiculatus	Tree		1.71413	0.325516	-0.771985
Inga quaternata	Tree		1.96643		-1.01233
Lonchocarpus guatemalensis	Tree		1.98833	0.393751	-0.950201
Lunania mexicana	Tree		1.74417	0.175802	-0.808549
Mortoniodendron guatemalense	Tree		1.99944	0.180126	-1.06349
Myriocarpa longipes	Shrub		1.73318	0.160168	-0.939302
Nectandra ambigens	Tree		2.13641	0.227887	-0.98464
Omphalea oleifera	Tree		1.84526	0.403292	-0.635918
Orthion oblanceolatum	Tree		1.84121	0.20167	-0.744727
Piper amalago	Tree		1.81664	0.327359	-0.852169
Piper auritum	Shrub		1.57231	0.507991	-0.66374
Piper hispidum	Shrub		1.81113	0.362294	-0.754734
Pleuranthodendron lindenii	Tree		1.99618	0.143015	-0.913284
Poulsenia armata	Tree		2.07417	0.222716	-0.695402
Pouteria durlandii	Tree		2.11373	0.200577	-1.1577
Pouteria rhynchocarpa	Tree		1.96225	0.0285713	-1.14905
Pseudolmedia oxyphyllaria	Tree		1.93587	0.0153598	-1.16463
Psychotria chiapensis	Tree		1.7308	0.25261	-0.984221
Psychotria faxlucens	Tree		1.74284	0.139879	-1.18376
Psychotria flava	Tree		2.04294	0.0378248	-1.16021
Psychotria simiarum	Tree		1.62455	0.206016	-1.15708
Pterocarpus rohrii	Tree		1.983	0.272306	-0.761452
Quararibea yunckeri	Tree		1.77103	0.128722	-0.794525
Garcinia intermedia	Tree		2.1383	-0.122629	-1.10485
Robinsonella mirandae	Tree		1.77855	0.29048	-0.742802
Spondias radlkoferi	Tree		1.86012	0.151676	-0.94962
Stemmadenia donnell-smithii	Tree		1.7252	0.350829	-0.92109
Trema micrantha	Tree		1.75927	0.360404	-0.820592
Trichilia martiana	Tree		1.78506	0.33646	-0.752518
Trichospermum mexicanum	Tree		1.98105	0.256718	-0.956245
Trophis mexicana	Tree		1.80643	0.2266	-0.942905
Turpinia occidentalis	Tree		1.90835	0.0484418	-1.12148
Urera caracasana	Shrub		1.75509	0.452247	-0.678091
Urera elata	Shrub		1.60214	0.136721	-0.985479
Vatairea lundellii	Tree		1.93218	0.191451	-1.12004
Vochysia guatemalensis	Tree		2.05102	0.0253059	-1.12755
Zanthoxylum kellermanii	Tree		1.81726	0.318689	-0.657577
Quercus falcata	Tree	0.915066	2.12385	0.167317		2.08276
Quercus hemispherica	Tree	0.961171	2.13415	0.0827854		1.97376
Quercus incana	Tree	0.752655	2.03291	-0.0222764		2.13879
Quercus laurifolia	Tree	0.880738	2.10257	0.120574		2.0234
Quercus laevis	Tree	0.933767	2.03678	0.184691		2.0971
Quercus myrtifolia	Tree	1.09116	2.10461	0.00860017		1.74328
Quercus nigra	Tree	0.935428	2.11014	0.11059		2.06158
Quercus shumardii	Tree	0.918527	1.99415	0.225309		2.18483
Quercus pumila	Tree	0.837273	2.08113	0.00432137		2.04202
Quercus stellata	Tree	0.897338	2.15193	0.238046		2.08776
Quercus margaretta	Tree	0.878854	2.04499	0.20412		2.18392
Quercus michauxii	Tree	0.915066	2.20738	-0.05061		2.08106
Quercus austrina	Tree	0.911578	2.05956	0.287802		2.13341
Quercus chapmanii	Tree	0.943638	2.06091	0.143015		1.87804
Quercus geminata	Tree	1.04347	2.35493	-0.0604807		1.94732
Quercus minima	Tree	0.83519	2.01115	0.25042		2.10047
Quercus virginiana	Tree	1.00989	2.17091	0.120574		2.20236
Arbutus andrachne	Shrub	1.10037	1.65758
Arbutus unedo	Shrub	1.17898	1.65365
Quercus coccifera	Shrub	1.13988	1.66555
Pistacia lentiscus	Shrub	1.05308	1.65561
Ceratonia siliqua	Shrub	1.37291	1.6925
Myrtus communis	Shrub	1.35218	1.86012
Olea europaea	Shrub	1.36922	1.64016
Phillyrea media	Shrub		1.767
Quercus ilex	Shrub		1.90309
Laurus nobilis	Shrub		1.91009
Nerium oleander	Shrub		1.69037
Dacrydium beccarii	Tree			-0.05061	-1.24413
Eugenia caudata	Tree			-0.187087	-1.3279
Eugenia stapfiana	Tree			-0.0655015	-1.09151
Eurycoma longifolia	Tree				-0.89279
Podocarpus neriifolius	Tree			-0.161151	-1.26761
Spondias radlkoferi	Tree	0.672098		0.423246
Annona spraguei	Tree	0.591065		0.342423
Desmopsis panamensis	Tree			0.344392
Guatteria dumentorum	Tree	1.32222		0.371068
Aspidosperma megalocarpon	Tree	1.4624		0.11059
Jacaranda copaia	Tree	0.845098		0.369216
Tabebuia rosea	Tree	0.90309		0.369216
Ochroma pyramidale	Tree			0.348305
Quararibea asterolepsis	Tree	1.06819		0.390935
Cordia alliodora	Tree	0.929419		0.491362
Protium tenuifolium	Tree	1.27875		0.232996
Tetragastris panamensis	Tree	1.36173		0.193125
Trattinickia aspera	Tree	0.838849		0.348305
Prioria copaifera	Tree	1.4624		0.332438
Swartzia simplex	Tree	1.68124		0.4133
Tachigali versicolor	Tree	1.36173		0.354108
Hirtella triandra	Tree	1.10037		0.257679
Alchornea costaricense	Tree	0.724276		0.365488
Croton bilbergianus	Tree			0.432969
Hyeronima alcheornoides	Tree	0.819544		0.385606
Sapium aucuparium	Tree	0.724276		0.4843
Casearia arborea	Tree	0.944483		0.450249
Zuelania guidonia	Tree	0.851258		0.298853
Calophyllum longifolium	Tree	1.54407		0.0681859
Miconia argentea	Tree	0.94939		0.222716
Guarea glabra	Tree	1.47712		0.491362
Guarea multiflora	Tree	1.53148		0.380211
Trichilia cipo	Tree	1.50515		0.313867
Cecropia insignis	Tree	0.672098		0.318063
Cecropia obtusifolia	Tree	0.60206		0.469822
Poulsenia armata	Tree	1.44716		0.20412
Virola sebifera	Tree	1.38021		0.432969
Alseis blackiana	Tree	1.0086		0.472756
Faramea occidentalis	Tree			0.206826
Macrocnemum glabrescens	Tree	0.963788		0.371068
Zanthoxylum ekmanii	Tree	0.672098		0.428135
Zanthoxylum panamense	Tree	0.875061		0.450249
Cupania rufescens	Tree	1.32222		0.271842
Cupania sylvatica	Tree	1.47712		0.409933
Chrysophyllum argenteum	Tree	0.934498		0.255273
Pouteria reticulata	Tree	1.43136		0.465383
Simarouba amara	Tree	1.03743		0.372912
Apeiba aspera	Tree	0.770852		0.340444
Apeiba tibourbou	Tree	0.591065		0.421604
Luehea seemannii	Tree	0.690196		0.418301
Trema micrantha	Tree	0.812913		0.460898
Acer platanoides	Tree		1.75716	0.371683	-0.784274
Acer pseudoplatanus	Tree		1.87583	0.4537	-0.752231
Aesculus hippocastanum	Tree		1.86328	0.372145	-0.80387
Alnus glutinosa	Tree		1.83594	0.548696	-0.68473
Arbutus unedo	Shrub		1.9652	0.362357	-0.717453
Berberis vulgaris	Shrub		1.88197	0.361098	-0.908333
Betula pendula	Tree		1.86468	0.439946	-0.796182
Buddleja davidii	Shrub		1.90913	0.296665	-0.630413
Buxus sempervirens	Shrub		2.04423	0.320492	-0.997114
Calluna vulgaris	Shrub		1.78448	0.169282	-1.01472
Castanea sativa	Tree		1.87597	0.375968	-0.845677
Cornus sanguinea	Shrub		1.79259	0.327359	-0.81342
Corylus avellana	Tree		1.83201	0.390273	-0.765314
Crataegus monogyna	Shrub		1.93854	0.253055	-0.895769
Cytisus scoparius	Shrub		1.79048	0.465631	-0.933364
Daphne mezereum	Shrub		1.64513	0.402548	-0.517126
Dryas octopetala	Shrub		1.80989	0.284807	-0.379864
Empetrum nigrum	Shrub		1.99546	0.123307	-0.968592
Erica cinera	Shrub		1.94755	0.151778	-1.04576
Euonymus europaeus	Tree		1.81139	0.388575	-0.719346
Fagus sylvatica	Tree		1.91045	0.377792	-0.865133
Frangula alnus	Shrub		1.67539	0.454845	-0.760284
Fraxinus excelsior	Tree		1.89319	0.410215	-0.738638
Hebe x franciscana	Shrub		1.93826	0.265604	-0.688953
Helianthemum nummularium	Shrub		1.88125	0.35336	-0.65083
Hippophae rhamnoides	Shrub		1.90416	0.48335	-0.825843
Ilex aquifolium	Tree		2.11279	0.205926	-0.891285
Juglans regia	Tree		1.83545	0.341105	-0.642065
Laburnum anagyroides	Tree		1.749	0.53233	-0.746608
Larix decidua	Tree		2.03795	0.352825	-0.765314
Ligustrum vulgare	Shrub		2.00037	0.19774	-0.971971
Malus sylvestris	Tree		1.9291	0.337126	-0.845677
Picea sitchensis	Tree		2.18779	0.115611	-0.917215
Pinus sylvestris	Tree		2.14615	0.223582	-0.709965
Prunus laurocerasus	Shrub		2.07753	0.208173	-0.748362
Prunus lusitanica	Shrub		2.15313	0.0673809	-1.01622
Prunus spinosa	Shrub		1.84204	0.48192	-0.672301
Quercus cerris	Tree		2.00246	0.437222	-0.79588
Quercus ilex	Tree		2.20401	0.370143	-0.747147
Quercus petraea	Tree		1.86904	0.409651	-0.849755
Quercus robur	Tree		1.87984	0.457882	-0.77083
Quercus rubra	Tree		1.75861	0.354749	-0.816256
Rhamnus cathartica	Shrub		1.7379	0.480247	-0.758205
Rhododendron ponticum	Shrub		2.06976	0.0144505	-0.9914
Ribes nigrum	Shrub		1.82093	0.265996	-0.750394
Ribes uva-crispa	Shrub		1.78304	0.349844	-0.737945
Robinia pseudoacacia	Tree		1.69618	0.472756	-0.810603
Salix caprea	Tree		1.84189	0.431721	-0.679854
Sambucus nigra	Shrub		1.71584	0.521792	-0.61365
Sorbus aucuparia	Tree		1.8566	0.402548	-0.736167
Taxus baccata	Tree		2.07416	0.37759	-0.669925
Thymus polytrichus	Shrub		1.79572	0.211521	-0.738341
Ulex europaeus	Shrub		1.95147	0.503791	-0.591195
Ulex gallii	Shrub		2.13944	0.354108	-0.79138
Ulmus glabra	Tree		1.87938	0.33912	-0.747147
Vaccinium myrtillus	Shrub		1.73928	0.232573	-1.00877
Vaccinium oxycoccos	Shrub		1.99942	0.185637	-1.04415
Vaccinium vitis-idaea	Shrub		2.14415	0.0501863	-1.01547
Viburnum opulus	Shrub		1.80119	0.379306	-0.794074
Viburnum tinus	Shrub		2.07004	0.0743287	-0.950782
Amelanchier alnifolia	Tree		2.02826	0.260071	-0.802341	2.18865
Artemisia tridentata	Shrub		2.22915	0.156246	-0.587893	1.64836
Juniperus osteosperma	Tree		2.81248	-0.121478	-0.957609	0.681241
Pinus jeffreyi	Tree		2.51985	0.0326188	-0.968729	1.50515
Pinus monophylla	Tree		2.8729	-0.047692	-0.926995	0.954243
Pinus ponderosa	Tree		2.49826	-0.0150229	-1.01282	1.35507
Purshia tridentata	Shrub			0.374015	-0.771866
Lyonia lucida	Shrub	1.25527	2.23603	-0.154902	-1.46374	1.68305
Cyrilla racemiflora	Shrub	1.25527	2.01284	0.100371	-1.25864	2.03463
Leucothoe racemosa	Shrub	0.812913	1.94841	-0.00877392	-1.31873	1.90363
Itea virginica	Shrub	0.812913	1.85248	0.049218	-1.17662	1.95665
Clethra alnifolia	Shrub	0.812913	1.93197	0.100371	-1.1706	2.10755
Achillea erba	Herb	0.361986	1.65322	0.664642		2.56067
Arabis alpina	Herb		1.57978	0.468347
Arabis caerulea	Herb		1.67761	0.50515
Artemisia genipi	Herb		1.62325	0.474216
Campanula barbata	Herb		1.72099	0.356026
Cerastium uniflorum	Herb		1.49958	0.417472
Doronicum clusii	Herb	0.249282	1.68842	0.606381		2.63639
Erigeron uniflorus	Herb	0.408983	1.67942	0.519171		2.67366
Gentiana bavarica	Herb		1.76938	0.209515
Gentiana kochiana	Herb		1.82347	0.133539
Geum montanum	Herb	0.323068	1.84907	0.392697		2.32883
Geum reptans	Herb	0.47593	1.85062	0.4133		2.28904
Leontodon hispidus	Herb		1.69897	0.501059
Leucanthemopsis alpina	Herb	0.419978	1.79588	0.372912		2.24565
Ligusticum mutellina	Herb	0.403379	1.89984	0.558709		2.47886
Linaria alpina	Herb		1.60206	0.376577
Oxyria digyna	Herb	0.19813	1.40653	0.658011		2.80967
Pedicularis asplenifolius	Herb	0.302218	1.7221	0.449478		2.49621
Polygonum viviparum	Herb	0.129672	1.84621	0.592732		2.46725
Potentilla aurea	Herb		1.67761	0.390935
Potentilla crantzii	Herb	0.380211	1.78246	0.515874		2.4318
Potentilla frigida	Herb		1.72428	0.39794
Primula glutinosa	Herb	0.397702	1.86169	0.428135		2.2204
Ranunculus glacialis	Herb	0.491362	1.78906	0.528595		2.47886
Senecio incanus	Herb		1.82347	0.30963
Sibbaldia procumbens	Herb		1.76938	0.271842
Taraxacum alpinum	Herb	0.336432	1.5623	0.468347		2.46344
Veronica alpestris	Herb		1.5682	0.363612
Veronica bellidioides	Herb		2	0.075547
Achillea millefolium	Herb	0.140138	1.71927	0.503791		2.5391
Alchemilla verticillata	Herb		1.43136	0.462398
Arabis hirsuta	Herb		1.69897	0.30103
Caltha palustris	Herb	0.408983	1.51055
Campanula glomerata	Herb		1.5682	0.431364
Carum carvi	Herb	0.302218	1.57864	0.544068		2.70115
Cerastium arvense	Herb		2	0.544068
Chrysanthemum leucanthemum	Herb	0.336432	1.71842	0.452553		2.64589
Erigeron acre	Herb		1.74819	0.322219
Geum rivale	Herb	0.456408	1.72263	0.385606		2.37572
Leontodon hispidus	Herb		1.63849	0.30103
Lychnis flos-jovis	Herb		1.65321	0.146128
Polygonum bistorta	Herb		1.5682	0.378398
Potentilla anserina	Herb	0.272763	1.71851	0.489958		2.5867
Potentilla reptans	Herb		1.53782	0.544068
Potentilla verna	Herb		1.77085	0.342423
Primula elatior	Herb	0.490016	1.62479	0.390935		2.4023
Primula farinosa	Herb		1.65321	0.230449
Ranunculus acris	Herb	0.257251	1.80382	0.373831		2.39147
Ranunculus bulbosus	Herb		1.74819	0.463893
Ranunculus ficaria	Herb		1.50515	0.518514
Ranunculus nemorosus	Herb		1.82607	0.30103
Taraxacum officinale	Herb	0.336432	1.53655	0.556303		2.82102
Trifolium repens	Herb	0.302218	1.53019	0.653213		2.68194
Veronica chamaedrys	Herb		1.50515	0.230449
Castilleja sp	Herb		1.81954	0.376577
Geranium sp	Herb		1.77815	0.120574
Lachemilla sp	Herb		1.96848	-0.0315171
Lupinus sp	Herb		1.716	0.507856
Plantago lanceolata	Herb		1.77085	0.363612
Taraxacum officinale	Herb		1.51851	0.60206
Trifolium repens	Herb		1.60206	0.536558
Baccharis arbutifolia	Shrub	0.431364	1.97772	0.465383
Chuquiraga jussieui	Shrub	0.80618	2.15229	0.225309
Diplostephium rupestre	Shrub	0.591065	2.18752	0.352183
Geranium confertum	Herb	0.529726	1.90309	0.404834
Gunnera magellanica	Herb		2.03743	0.356026
Gynoxis sp	Shrub	0.982271	2.22531	0.201397
Halenia weddelifolia	Herb		1.94448	0.225309
Loricaria ilinissae	Shrub	1.33646	2.29885	0.0293838
Lupinus kunthii	Herb	0.538078	1.92428	0.592177
Niphogeton dissecta	Herb	0.806923	2.10037	0.448706
Plantago rigida	Herb		2.21219	0.123852
Ranunculus peruvianus	Herb	0.542194	1.83885	0.518514
Senecio comosus	Herb	0.529726	1.82607	0.568202
Valeriana pilosa	Herb	1.00685	2.08636	0.260071
Werneria nubigena	Herb	0.938492	2.26007	0.350248
Aa sp	Herb		2.02531	0.421604
Astragalus geminiflorus	Herb		2.12744	0.539703
Azorella pedunculata	Herb		2.11059	0.206826
Calandrinia acaulis	Herb		2	0.429752
Cerastium mollissimum	Herb	0.58877	1.81291	0.429752
Culcitium canescens	Herb		2.44248	0.0827854
Culcitium nivale	Herb	0.806923	2.37453	0.1959
Culcitium reflexum	Herb		2.233	0.198657
Draba aretioides	Herb		1.88081	0.32838
Erigeron ecuadoriensis	Herb	0.951457	1.81954	0.456366
Gentianella numularifolia	Herb		1.81291	0.222716
Hypochoeris sonchoides	Herb	0.762401	1.93952	0.363612
Lachemilla orbiculata	Herb		2.11394	0.0606978
Nototriche phyllanthos	Herb	0.837035	1.94448	0.394452
Oreomyrrhis andicola	Herb	0.739605	2.03743	0.278754
Plantago nubigena	Herb	1.03144	2.19866	-0.107905
Rumex acetosella	Herb		1.82607	0.371068
Silene thysanodes	Herb	0.882376	1.87506	0.431364
Werneria humilis	Herb		1.98677	0.161368
Werneria nubigena	Herb		2.19866	0.155336
Werneria pumila	Herb	0.675251	2.233	0.240549
Castilleja fissifolia	Herb		1.68124	0.143015
Cerastium mollissimum	Herb		1.77085	0.50515
Culcitium reflexum	Herb		2.29226	0.164353
Viola sp	Herb		1.86923	0.692847
Arbutus menziesii	Shrub		2.08991	0.128709		1.80277
Heteromeles arbutifolia	Shrub		2.36361	0.0156699		1.6561
Prunus ilicifolia	Shrub		2.19866	0.250242		1.734
Rhamnus californica	Shrub		2.02531	0.279977		1.85552
Umbellularia californica	Shrub		2.11727	0.246809		1.79588
Didymopanax macrocarpum	Tree
Qualea grandiflora	Tree
Miconia fallax	Shrub
Roupala montana	Shrub
Ouratea hexasperma	Shrub
Acer monspessulanum	Tree		1.92445	0.347835
Bupleurum rigidum	Herb		2.02687	0.137664
Buxus sempervirens	Shrub		2.21467	0.060252
Calamintha nepeta	Shrub		1.57512	0.504373
Convolvulus arvensis	Herb		1.64397	0.458192
Crepis sancta	Herb		1.58004	0.276772
Crepis vesicaria	Herb		1.74473	0.440904
Daucus carota	Herb		1.88941	0.440904
Kickxia spuria	Herb		1.46218	0.342338
Medicago minima	Herb		1.48017	0.684257
Phillyrea latifolia	Shrub		2.12494	0.060252
Pistacia terebinthus	Tree		1.96658	0.333959
Plantago lanceloata	Herb		1.80134	0.253648
Psoralea bituminosa	Shrub		1.71897	0.63216
Quercus ilex	Tree		2.17393	0.21832
Quercus pubescens	Tree		2.00436	0.229224
Rubia peregrina	Shrub		1.84771	0.15076
Rubus sp	Shrub		1.76955	0.391951
Sanguisorba minor	Herb		1.75203	0.361282
Scabiosa atropurpurea	Herb		1.92082	0.443103
Urospermum dalechampii	Herb		1.49621	0.508166
Viburnum tinus	Shrub		1.96257	0.100681
Acer monspessulanum	Tree	0.757438	1.84466	0.328282		2.16223
Calamintha nepeta	Shrub		1.53611	0.431995
Crataegus monogyna	Shrub	0.684206	1.85078	0.276772		2.23231
Dorycnium pentaphyllum	Herb	0.747337	1.73755	0.533828		2.25158
Helianthemum nummularium	Shrub		1.82391	0.408889
Lavandula latifolia	Shrub		1.91364	0.289453
Pistacia terebinthus	Tree		1.84466	0.394411
Plantago lanceloata	Herb	0.650427	1.70115	0.379434		2.52567
Psoralea bituminosa	Shrub		1.71444	0.644749
Quercus pubescens	Tree		1.97469	0.325415
Rubia peregrina	Shrub	0.675251	1.78781	0.289453		2.31425
Rubus sp	Shrub	0.824384	1.72816	0.363922		2.23605
Scabiosa atropurpurea	Herb		1.86967	0.472774
Teuchrium chamaedrys	Shrub	0.853348	1.84466	0.325415		2.31844
Viburnum tinus	Shrub	1.08391	1.78781	0.183865		1.8814
Acer monspessulanum	Tree		1.89963	0.253648
Anagallis arvensis	Herb		1.39794	0.460305
Bupleurum rigidum	Herb	0.624098	1.90658	0.210206		2.41466
Buxus sempervirens	Shrub	1.20531	2.21467	0.163912		1.51741
Calamintha nepeta	Shrub	0.542194	1.57823	0.419421		2.37924
Catananche coerulea	Herb	0.471131	1.79588	0.307651		2.5722
Convolvulus arvensis	Herb		1.58004	0.460305
Crataegus monogyna	Shrub		1.97881	0.203343
Crepis sancta	Herb		1.48945	0.263709
Crepis vesicaria	Herb		1.58838	0.328282
Daucus carota	Herb	0.435966	1.75056	0.40239		2.44053
Dorycnium hirsutum	Herb	0.516888	1.67613	0.504068		2.44791
Dorycnium pentaphyllum	Herb		1.83863	0.425192
Echinops ritro	Herb	0.50366	1.92812	0.429746		2.33036
Eryngium campestre	Herb	0.39195	1.98716	0.334206		2.35119
Helianthemum nummularium	Shrub	0.419978	1.8066	0.354828		2.16432
Juniperus oxycedrus	Shrub	1.25883	2.14874	-0.0755656		1.40121
Kickxia spuria	Herb		1.46597	0.322529
Lavandula latifolia	Shrub	0.620692	1.9692	0.234892		1.66179
Lotus corniculatus	Herb		1.68403	0.486882
Medicago minima	Herb	0.361986	1.66354	0.573844		2.39073
Phillyrea latifolia	Shrub		2.04096	0.257028
Pistacia terebinthus	Tree	0.754934	1.99012	0.325256		2.08453
Plantago lanceloata	Herb		1.77728	0.307806
Potentilla crantzii	Herb	0.58877	1.91009	0.257353		2.37199
Prunus mahaleb	Shrub	0.63416	1.88739	0.343756		2.24887
Prunus spinosa	Shrub	0.721008	1.90658	0.279366		2.19661
Psoralea bituminosa	Shrub		1.70333	0.623559
Quercus ilex	Tree	1.35699	2.22621	0.114077		1.7312
Quercus pubescens	Tree	0.830756	2.03598	0.304213		1.86493
Rosa micrantha	Shrub	0.525489	1.89279	0.279366		2.21937
Rubia peregrina	Shrub		1.73049	0.313755
Rubus sp	Shrub		1.91009	0.27029
Ruscus aculeatus	Shrub		1.74232	0.429739
Sanguisorba minor	Herb	0.485371	1.7122	0.322374		2.31959
Scabiosa atropurpurea	Herb		1.92082	0.394411
Stachys officinalis	Herb		1.78252	0.3167
Teuchrium chamaedrys	Shrub	0.715545	1.88606	0.29879		1.72628
Thymus vulgaris	Shrub	0.769741	1.89739	0.295699		1.92288
Trifolium angustifolium	Herb		1.66354	0.511926
Urospermum dalechampii	Herb		1.61798	0.319624
Viburnum tinus	Shrub		1.92445	0.0385327
Viola scotophylla	Herb	0.566106	1.67572	0.292411		2.25693
Xeranthemum inapertum	Herb	0.265076	1.44916	0.498319		2.56717
Cistus monspeliensis	Shrub		2.1267	0.320146		2.27016
Cneorum tricoccon	Shrub		2.00466	0.303196		2.02996
Hypericum balearicum	Shrub		2.06854	0.389166		1.99608
Phillyrea latifolia	Shrub		2.08369	0.25042		2.02631
Pinus halepensis	Tree		2.09795	0.113943		1.78343
Pistacia lentiscus	Shrub		2.31843	0.149219		1.79736
Rhamnus ludovici-salvatoris	Shrub		2.21921	0.260071		1.7694
Urginea maritima	Herb		2.04235	0.49276		2.04653
Arbutus unedo	Tree		2.2152	0.075547		1.74213
Cistus albidus	Shrub		2.04007	0.287802		2.20205
Cistus salvifolius	Shrub		2.13243	0.267172		2.16049
Quercus coccifera	Shrub		2.22794	0.0791812		1.77358
Quercus Ilex	Tree		2.28988	0.1959		1.7761
Rhamnus alaternus	Shrub		2.17931	0.305351		1.82897
Acer opalus	Tree		1.75251	0.514548		2.12683
Avenula crassifolia	Herb		1.96417	0.346353		2.16446
Capparis spinosa	Shrub		1.8898	0.673942		2.55641
Cephalaria squamiflora	Shrub		2.05773	0.359835		2.24437
Crepis triasii	Herb		1.72787	0.519828		2.4545
Delphinium pictium	Herb		1.7545	0.592177		2.51083
Dianthus rupicola	Herb		2.0586	0.307496		2.15219
Euphorbia margalidiana	Shrub		1.90482	0.564666		2.21754
Globularia cambessedesii	Shrub		2.19571	0.212188		2.03098
Ligusticum huteri	Shrub		1.60358	0.618048		2.58783
Limonium migjornense	Shrub		2.03195	0.392697		2.19075
Phlomis italica	Shrub		2.04178	0.320146		2.26036
Pistacia terebinthus	Shrub		2.13008	0.450249		2.18968
Silene mollisima	Shrub		1.83569	0.563481		2.33261
Urtica atrovirens	Herb		1.64464	0.609594		2.54847
Viola jaubertiana	Herb		1.72206	0.562293		2.33761
Viola stolonifera	Herb		1.58883	0.622214		2.51034
Viola x balearica	Herb		1.80298	0.429752		2.26663
Amaranthus blitoides	Herb		1.74135	0.635484		2.79337
Amaranthus retroflexus	Herb		1.7705	0.40654		2.53265
Anagyris foetida	Shrub		1.97944	0.570543		2.36394
Atriplex halimus	Shrub		1.94188	0.716003		2.41218
Beta vulgaris	Herb		1.71314	0.580925		2.6519
Ceratonia siliqua	Tree		2.40203	0.155336		1.7193
Chenopodium album	Herb		1.83119	0.623249		2.59874
Cichorium intybus	Herb		1.54425	0.550228		2.73986
Convolvulus arvensis	Herb		1.6214	0.737987		2.62931
Datura stramonium	Herb		1.68488	0.757396		2.7757
Dittrichia viscosa	Shrub		1.73105	0.531479		2.50318
Fraxinus angustifolia	Tree		2.0532	0.374748		2.30722
Helleborus lividus	Shrub		2.23251	0.227887		1.88272
Helleborus foetidus	Shrub		2.22616	0.220108		1.83867
Lavandula dentata	Shrub		1.90006	0.390935		2.47394
Lavatera cretica	Herb		1.6794	0.702431		2.80353
Paeonia cambessedesii	Herb		2.06028	0.240549		2.02429
Populus alba	Tree		1.96381	0.371068		2.2786
Quercus humilis	Tree		2.02267	0.436163		2.20347
Verbascum sinuatum	Herb		1.86453	0.318063		2.53121
Vitex agnus-castus	Shrub		1.92047	0.523746		2.44478
Castanopsis sieboldii	Tree	1.15196	2.08448	0.00160039		1.6464
Quercus acuta	Tree	1.16035	2.04558	-0.100361		1.6698
Camellia japonica	Tree	1.09109	2.00526	0.00592776		1.86178
Cleyera japonica	Tree	0.894404	2.02493	0.0598479		1.8393
Cinnamomum japonicum	Tree	1.37661	2.04997	-0.0104091		1.60548
Neolitsea sericea	Tree	1.20133	1.97954	0.0212604		1.61782
Illicium anisatum	Tree	1.22267	1.76338	0.0980375		1.82453
Maesa japonica	Shrub	1.15783	1.9094	0.0428644		1.78135
Boehmeria sp	Shrub		1.74275	0.39838		2.00862
Syzygium sp1	Tree		1.8219	0.170256		1.7236
Macaranga triloba	Tree		1.54185	0.514726		2.34139
Parashorea malaanonan	Tree		1.68554	0.279696		1.9406
Shorea argentifolia	Tree		1.66563	0.32442		2.027
Drimys piperita	Shrub		1.82304	0.180094		1.86914
Syzygium confertum	Tree		2.05853	0.132402		1.67209
Macaranga sp	Tree		1.81974	0.171177		1.89256
Trigonobalanus verticillatus	Tree		1.98573	0.184205		1.7402
Tristaniopsis clementis	Tree		2.10263	0.052831		1.77221
Drimys piperita	Shrub		2.06936	0.253431		1.50555
Syzygium houttuynii	Tree		2.25616	0.100785		1.29439
Lithocarpus havilandii	Tree		2.32268	0.0854665		1.23644
Photinia davidiana	Tree		2.16636	0.347035		1.6562
Schima brevifolia	Tree		2.20386	0.0867273		1.43391
Drimys piperita	Shrub		2.07425	0.345775		1.39049
Syzygium sp2	Tree		2.26102	0.245858		1.20465
Photinia davidiana	Tree		2.1103	0.3363		1.50012
Scolopia crassipes	Tree		2.07918	0.133539	-1.0752
Eugenia mabaeoides	Tree		1.95424	0.11059	-1.14691
Acronychia pedunculata	Tree		2.01284	0.322219	-1.02549
Actinodaphne ambigua	Tree		2.18469	0.0569049	-1.17393
Allophylus varians	Tree		1.94448	0.356026	-0.818442
Michelia nilagirica	Tree		1.91908	0.262451	-0.93968
Acer saccharum	Tree		1.81417	0.206826	-0.958607
Carya glabra	Tree		1.8729	0.220108	-0.920819
Fagus grandifolia	Tree		1.83003	0.294466	-0.920819
Liriodendron tulipifera	Tree		1.88439	0.235528	-0.920819
Quercus alba	Tree		1.89585	0.252853	-0.721246
Quercus prinus	Tree		1.94006	0.176091	-0.886057
Quercus rubra	Tree		1.97265	0.209515	-0.920819
Quercus velutina	Tree		2.02182	0.139879	-0.920819
Acer rubrum	Tree		1.85733			2.06112
Acer saccharum	Tree		1.77085			1.93321
Fagus grandfolia	Tree		1.79239			2.01865
Populus grandidentata	Tree		1.89209			2.28642
Quercus rubra	Tree		2.04139			2.05517
Anacardium excelsum	Tree	0.9268	1.92	0.220108		2.09639	1.41366
Luehea seemannii	Tree	0.8024	2.14	0.307496		2.13172	1.32993
Castilla elastica	Tree	0.7649	1.89	0.32838		2.00335	1.43348
Antirrhoea trichantha	Tree	0.7599	1.97	0.31597		2.31707	1.26197
Urera caracasana	Tree	0.4759	1.83	0.583199		2.36491	1.46013
Cecropia longipes	Tree	0.4564	2.06	0.416641		2.23702	1.33611
Acer palmatum	Tree		1.65321			1.96658
Acer mono	Tree	0.649335	1.75205	0.20412		1.90553
Carpinus cordata	Tree		1.79796			1.93678
Cornus contraversa	Tree	0.634477	1.79796			1.97077
Ostrya japonica	Tree	0.672098	1.81291			2.00852
Populus sieboldii	Tree	0.546543	1.83251			2.17725
Prunus ssiori	Tree		1.86034			1.87943
Maackia amurensis	Tree	0.62634	1.88081			1.94882
Juglans ailanthifolia	Tree	0.565848	1.90037	0.491362		1.95678
Cercidiphyllum japonicum	Tree	0.641474	1.85733			2.00737
Sorbus commixta	Tree	0.713491	1.86629			2.00214
Fraxinus madshurica	Tree	0.572872	1.85733	0.380211		2.02209
Kalopanax pictus	Tree		1.87506			2.01332
Tilia japonica	Tree		1.86923	0.380211		2.03138
Betula maximowicziana	Tree		1.86332			2.06726
Betula platyphylla	Tree		1.86332	0.531479		2.11877
Alnus hirsuta	Tree	0.517196	1.89487	0.50515		2.15823
Tilia maximowicziana	Tree		1.91116			1.94024
Ulmus davidiana	Tree		1.91908	0.50515		1.94562
Prunus sargentii	Tree		1.9345			1.96612
Sorbus alnifolia	Tree		1.92942			1.97804
Magnolia obovata	Tree	0.618048	1.90849			2.03477
Alnus japonica	Tree		1.90849			2.10127
Betula ermanii	Tree	0.649335	1.91381			2.1465
Fagus crenata	Tree	0.725912	1.98			1.75726
Quercus mongolica	Tree	0.719331	1.95904			1.87463
Ulmus laciniata	Tree	0.546543	1.98227			1.92178
Betula davurica	Tree		1.98453			1.97709
Salix hultenii	Tree		2.01284			1.84811
Populus maximowiczii	Tree	0.556303	2.01072			2.09702
Nothofagus menziesii	Tree		2.17783	0.126969
Griselinia littoralis	Tree		2.02919	0.0203397
Gaultheria antipoda	Shrub		2.05453	-0.0388616
Ranunculus hirtus	Herb		1.77833	0.146264
Achillea millefolium	Herb		1.69332	0.358955
Alnus incana	Tree		1.858	0.5075
Andromeda polifolia	Shrub	1.16817	2.11089	0.191269
Angelica sylvestris	Herb		1.47629	0.473411
Anthriscus sylvestris	Herb		1.3706	0.374707
Arctostaphylos alpina	Shrub	0.471131	1.93005	0.158434
Astragalus alpinus	Herb		1.61414	0.59364
Astragalus frigidus	Herb		1.6693	0.703757
Bartsia alpina	Herb		1.85603	0.420113
Betula nana	Shrub	0.478309	1.90542	0.350165
Betula pubescens	Tree		1.8385	0.440723		2.07918
Caltha palustris	Herb		1.38021	0.553461
Cassiope tetragona	Shrub	1.51776		-0.0705811
Chamerion angustifolium	Herb		1.82087	0.469869
Cornus suecica	Herb		1.50946	0.31503
Drosera rotundifolia	Herb		1.40097	0.0792708		1.65896
Dryas octopetala	Shrub	0.441168	1.96942	0.306221
Empetrum hermaphroditum	Shrub	1.61031	2.24797	-0.107905
Empetrum nigrum	Shrub	1.60996	1.94122	0.0780164		1.60206
Euphrasia frigida	Herb		1.48651	0.730386
Filipendula ulmaria	Herb		1.54758	0.443789
Geranium sylvaticum	Herb		1.66384	0.434792
Gymnocarpium dryopteris	Herb		1.44996	0.216641
Juniperus communis	Shrub		2.22209	0.0590216
Lathyrus pratensis	Herb		1.5308	0.686813
Loiseleuria procumbens	Shrub	1.5692	2.39794	-0.148742
Melampyrum sylvaticum	Herb		1.49779	0.269643
Orthilia secunda	Herb		1.74547	0.273482
Pedicularis lapponica	Herb	0.316229	1.78879	0.487689
Pedicularis sceptrum-carolinum	Herb		1.80754	0.268677
Phyllodoce caerulea	Shrub	1.44885	2.07555	-0.0809219
Picea abies x obovata	Tree		2.47845	0.121898
Pinguicula vulgaris	Herb		1.21605	0.200317		1.78533
Pinus sylvestris	Tree		2.4792	-0.0251104
Polygonum viviparum	Herb	0.265076	1.84436	0.499595
Populus tremula	Tree		1.8862	0.398789
Rhinanthus minor	Herb		1.8171	0.550003
Rhodiola rosea	Herb		1.53215	0.494424
Rhododendron lapponicum	Shrub	1.14065	2.12829	0.221642
Ribes spicatum	Shrub		1.52334	0.468833
Rubus chamaemorus	Herb		1.90863	0.274862
Rubus saxatilis	Herb		1.48251	0.359035
Rumex obtusififolius	Herb		1.6044	0.522745
Salix lapponum	Shrub		1.93323	0.389405
Salix myrsinites	Shrub	0.473537	2.06589	0.236358
Salix reticulata	Shrub	0.508114	2.09822	0.227961
Solidago virgaurea	Herb		1.56016	0.457034
Sorbus aucuparia	Tree		1.79755	0.287006
Tanacetum vulgare	Herb		1.68892	0.423399
Trifolium pratense	Herb		1.40709	0.673672
Vaccinium myrtillus	Shrub	0.471131	1.73113	0.277858		2.01284
Vaccinium uliginosum	Shrub	0.471131	1.89139	0.297829		2.01284
Vaccinium vitis-idaea	Shrub	1.44477	2.20272	-0.0159884		1.60206
Viccia cracca	Herb		1.44405	0.735002
Arctostaphylos alpina	Shrub	0.38612	1.98227	0.269513
Astragalus alpinus	Herb		1.66276	0.749736
Astragalus frigidus	Herb		1.6721	0.745855
Bartsia alpina	Herb		1.90139	0.390935
Betula nana	Shrub	0.316229	1.91075	0.498999
Cassiope tetragona	Shrub	1.59085	2.13349	0.134145
Diapensia lapponica	Shrub	1.62664	2.19574	0.131939
Dryas octopetala	Shrub	0.419978	2.05641	0.30963
Empetrum hermaphroditum	Shrub	1.62138	2.19137	-0.0154727
Loiseleuria procumbens	Shrub	1.71829	2.36321	0.0232525
Oxyria digyna	Herb		1.79452	0.545307
Pedicularis hirsuta	Herb		1.69298	0.441774
Pedicularis lapponica	Herb	0.349397	1.95899	0.361728
Phyllodoce caerulea	Shrub	1.53392	2.10697	0.0433623
Polygonum viviparum	Herb	0.241164	1.94398	0.569959
Potentilla crantzii	Herb	0.33971	1.91356	0.428135
Ranunculus nivalis	Herb	0.425373	1.69604	0.4843
Rhododendron lapponicum	Shrub	1.12219	2.2014	0.271842
Rubus chamaemorus	Herb		1.90309	0.414973
Salix herbacea	Shrub	0.421784	1.9127	0.426767
Salix myrsinites	Shrub		1.97772	0.394452
Salix polaris	Shrub	0.395793	1.92012	0.395326
Salix reticulata	Shrub	0.435966	2.03832	0.356026
Sibbaldia procumbens	Herb	0.19813	1.80251	0.460898
Trollius europaeus	Herb		1.55536	0.397713
Vaccinium myrtillus	Shrub	0.336432	1.86332	0.212188
Vaccinium uliginosum	Shrub	0.346192	1.90423	0.39794
Vaccinium vitis-idaea	Shrub	1.56611	2.3913	-0.0132283
Veronica alpina	Herb		1.56104	0.490714
Cassiope tetragona	Shrub	1.71719		0.075547
Dryas octopetala	Shrub		2.07188	0.371068
Oxyria digyna	Herb		1.85126	0.628389
Polygonum viviparum	Herb		1.90309	0.603144
Salix polaris	Shrub		1.86923	0.586587
Prunus spinosa	Shrub	0.763428	1.95468	0.326336	-0.744727	2.06819
Crataegus x macrocarpa	Shrub	0.819544	2.04096	0.30963	-0.619789	1.95904
Acer campestre	Tree	0.78533	1.97881	0.287802	-0.721246	2
Ribes uva crispa	Shrub	0.908485	1.81248	0.313867	-0.823909	2.18752
Aegle marmelos	Tree		2.05918	0.285557	-0.283997
Amoora rohitika	Tree		1.60853	0.257679	-0.585027
Annona squamosa	Tree		1.73957	0.501059	-0.769551
Anthocephalus cadamba	Tree		2.05614	0.243038	-0.721246
Artocarpus heterophyllus	Tree		2.02407	0.418301	-0.721246
Artocarpus lakoocha	Tree		1.96332	0.298853	-0.769551
Azadirachta indica	Tree		1.89763	0.4843	-0.721246
Bambusa bambos	Tree		1.79379	0.361728	-0.853872
Bauhinia variegata	Tree		1.88195	0.478566	-0.337242
Bombax ceiba	Tree		2.06221	0.20412	-0.721246
Bougainvellia spectabilis	Shrub		1.82672	0.436163	-0.958607
Carissa carundu	Shrub		1.94645	0.0681859	-0.823909
Cassia fistula	Tree		1.81558	0.342423	-0.769551
Cordia dichotoma	Tree		2.0607	0.326336	-0.769551
Crescentia cujete	Tree		1.83251	0.30103	-0.79588
Dalbergia sissoo	Tree		2.08243	0.320146	-0.744727
Dillenia indica	Tree		1.96332	0.133539	-0.853872
Diospyros embryopteris	Tree		2.00817	0.212188	-0.568636
Eucalyptus globulus	Tree		2.16137	0.103804	-0.823909
Ficus benghalensis	Tree		2.10175	0.11059	-0.958607
Ficus carica	Tree		1.93349	0.499687	-0.677781
Ficus religiosa	Tree		2.03703	0.170262	-0.920819
Ficus rumphii	Tree		1.89818	0.190332	-0.886057
Gardenia jasminoides	Shrub		1.91434	0.181844	-0.769551
Grewia asiatica	Tree		2.00518	0.238046	-0.552842
Hamelia patens	Shrub		1.82151	0.523746	-0.677781
Hibiscus rosa-sinensis	Shrub		1.66839	0.350248	-0.221849
Holoptelia integrifolia	Tree		1.79657	0.439333	-0.79588
Ixora alba	Shrub		1.92273	0.342423	-0.568636
Ixora coccinea	Shrub		2.00647	0.143015	-0.823909
Kigelia pinnata	Tree		2.03822	0.227887	-0.744727
Lagerstroemia speciosa	Tree		1.94151	0.307496	-0.677781
Litchi chinensis	Tree		2.11025	0.152288	-0.568636
Madhuca indica	Tree		2.05038	0.247973	-0.920819
Magnolia grandiflora	Tree		2.19424	0.127105	-0.920819
Mallotus phillippensis	Tree		1.7574	0.396199	-0.39794
Mangifera indica	Tree		2.13162	0.225309	-0.823909
Mimusops elengi	Tree		2.09864	0.222716	-0.346787
Mimusops hexendra	Tree		2.08955	0.209515	-0.60206
Mitragyna parviflora	Tree		1.95904	0.292256	-0.886057
Morus alba	Tree		1.82802	0.307496	-0.769551
Nyctanthes arbor-tristis	Tree		1.99167	0.230449	-0.537602
Polyalthia longifolia	Tree		1.80686	0.326336	-0.677781
Polyalthia pendulosa	Tree		1.85612	0.403121	-0.619789
Pongamia pinnata	Tree		1.78104	0.445604	-0.823909
Populus deltoides	Tree		2.01157	0.382017	-0.744727
Psidium guajava	Tree		1.95952	0.238046	-0.677781
Pterospermum acerifolia	Tree		1.98091	0.155336	-0.585027
Quisqualis indica	Shrub		1.60853	0.463893	-0.366532
Sapindus mykorossi	Tree		1.71933	0.478566	-0.431798
Saraca indica	Tree		1.94645	0.30963	-0.677781
Schleichera oleosa	Tree		1.91009	0.252853	-0.283997
Semecarpus anacardium	Tree		1.82737	0.262451	-0.537602
Spathodea companulata	Tree		2.01578	0.285557	-0.769551
Spondias mangifera	Tree		1.88762	0.245513	-0.823909
Sterculia alata	Tree		1.94201	0.357935	-0.69897
Sterculia colorata	Tree		1.9489	0.217484	-0.744727
Strychnos nuxvomica	Tree		1.90417	0.418301	-0.958607
Swietinia mahogoni	Tree		1.9284	0.181844	-1.04576
Syzygium jambos	Tree		2.06221	0.130334	-1.04576
Tabernaemontana coronaria	Shrub		1.74273	0.613842	-0.267606
Tectona grandis	Tree		2.13098	0.176091	-0.769551
Terminalia arjuna	Tree		2.11793	0.164353	-0.721246
Terminalia bellirica	Tree		2.197	-0.0655015	-0.49485
Terminalia chebula	Tree		1.87216	0.287802	-0.568636
Thevetia paruviana	Tree		1.86153	0.283301	-0.886057
Woodfordia fruticosa	Shrub		2.04493	0.123852	-0.886057
Ziziphus jujuba	Tree		2.1209	0.245513	-0.721246
Adina cordifolia	Tree	0.954243	2.08743	0.320146	-0.823909
Anogeissus latifolia	Tree		2.16256	0.158362	-1.04576
Bauhinia racemosa	Tree		1.91487	0.392697	-0.744727
Boswellia serrata	Tree		2.09899	0.120574	-0.30103
Bridelia retusa	Tree		1.93601	0.290035	-0.823909
Buchanania lanzan	Tree	1	2.06333	0.298853	-0.886057
Butea monosperma	Tree	1.04139	2.14613	0.404834	-0.853872
Diospyros melanoxylon	Tree	1.04139	2.07809	0.167317	-0.958607
Ficus racemosa	Tree	0.845098	1.96426	0.322219	-0.721246
Gardenia latifolia	Tree		1.94349	0.230449	-0.920819
Hardwickia binata	Tree		2.07628	0.305351	-0.920819
Lagerstroemia parviflora	Tree		2.10517	0.130334	-1.04576
Lannea coromandelica	Tree		1.90687	0.209515	-0.327902
Miliusa tomentosa	Tree		1.93349	0.356026	-0.79588
Pterocarpus marsupium	Tree		2.06258	0.394452	-1
Shorea robusta	Tree	1.11394	1.98856	0.294466	-0.958607
Soymida febrifuga	Tree		2.12743	0.149219	-1.09691
Syzygium cumini	Tree	1.11394	2.13481	0.303196	-0.958607
Terminalia alata	Tree	1	2.02898	0.167317	-0.886057
Wrightia tomentosa	Tree		1.82413	0.363612	-0.886057
Xeromphis uliginosa	Tree		1.9248	0.193125	-0.958607
Ziziphus glaberrima	Tree		1.99782	0.340444	-0.886057
Achillea millefolium	Herb	0	1.92623	0.264325		2.21748	1.17609
Amorpha canescens	Shrub		1.81466	0.376168		2.35025	1.24055
Anemone cylindrica	Herb		1.79493	0.271537		2.13033	1.11727
Lespedeza capitata	Herb		1.79783	0.451789		2.32222	1.42488
Lupinus perennis	Herb		1.73081	0.515256		2.45788
Petalostemum villosum	Herb		1.93271	0.35308		2.41497	1.31597
Solidago rigida	Herb	0.30103	1.96524	0.17368		2.19866	1.08279
Aextoxicon punctatum	Tree	1.73239	2.10292	-0.0177288
Amomyrtus luma	Tree	1.62325	2.14935	0.00432137
Araucaria araucana	Tree	2.45939	2.50307	-0.236572
Drimys winteri	Tree	1.62325	2.25026	-0.0604807
Embothrium coccineum	Tree	1.11394	2.01368	0.240549
Eucryphia cordifolia	Tree	1.63347	2.08831	-0.00436481
Laurelia philippiana	Tree	1.6721	2.12668	0.193125
Myrceugenia planipes	Tree	1.65321	2.04335	0.0569049
Nothofagus betuloides	Tree	1.44716	2.22403	0.075547
Nothofagus nitida	Tree	1.57978	2.17783	0.064458
Ovidia pillo-pillo	Tree	1.39794	1.99482	0.330414
Podocarpus nubigena	Tree	1.94448	2.31069	-0.0362122
Podocarpus saligna	Tree	1.57978	2.24795	-0.0315171
Saxegothaea conspicua	Tree	1.69897	2.12378	0.0293838
Weinmannia trichosperma	Tree	1.38021	2.17393	-0.0457575
Cryptocarya alba	Tree	1.49831	2.16115	-0.0705811		1.85187	0.969183
Drimys winteri	Tree	1.44716	2.13668	0.0334238		1.80754	1.00945
Eucryphia cordifolia	Tree	1.43136	2.13077	-0.09691		1.91434	0.71433
Luma apiculata	Tree	1.30963	2.21467	0.0569049		1.79379	0.98945
Nothofagus dombeyi	Tree	1.15836	2.09151	0.238046		1.9652	0.949878
Podocarpus saligna	Tree	1.38021	2.22185	-0.00877392		1.57054	0.773786
Austrocedrus chilensis	Tree	1.4624	2.29243	0.0374265		1.58883	0.786751
Lomatia hirsuta	Tree	1.38021	2.09151	-0.0757207		1.86273	0.908485
Persea lingue	Tree	1.51851	2.01773	0.00432137		1.89597	0.635484
Podocarpus saligna	Tree	1.44716	2.22915	0.0413927		1.56348	0.673942
Prumnopitys andina	Tree	1.52827	2.16749	-0.0315171		1.58092	0.61066
Aextoxicon punctatum	Tree	1.64345	2.13077	-0.00877392		1.617	0.568202
Dasyphyllum diacanthoides	Tree	1.20412	2.11919	0.0827854		1.86332	0.893651
Drimys winteri	Tree	1.5563	2.25964	-0.21467		1.63849	0.970812
Embothrium coccineum	Tree	0.845098	2.00877	0.181844		2.14301	1.19535
Eucryphia cordifolia	Tree	1.53148	2.11919	0		1.87622	0.767304
Gevuina avellana	Tree	1.716	2.18709	-0.09691		1.76716	0.812913
Laurelia philippiana	Tree	1.43136	2.20761	0.161368		1.59879	0.792392
Luma apiculata	Tree	1.32222	2.14267	0.0413927		1.77085	0.971276
Myrceugenia planipes	Tree	1.5563	2.12494	0		1.66745	0.720159
Nothofagus dombeyi	Tree	1.30103	2.13077	0.11059		1.91062	1.05956
Podocarpus nubigena	Tree	1.89209	2.30103	-0.124939		1.5966	0.631849
Saxegothaea conspicua	Tree	1.5563	2.10791	-0.091515		1.65514	0.682957
Andira inermis	Tree	1.07918
Cassia grandis	Tree	1.07918
Licania arborea	Tree	1.11394
Pithecellobium saman	Tree	1.0607
Psidium guajava	Tree	1.11394
Simarouba glauca	Tree	1.07918
Jacquinia pungens	Tree	0.812913
Ambrosia psilostachya	Herb
Amorpha canescens	Shrub
Artemisia ludoviciana	Herb
Asclepias virdaflora	Herb
Asclepias viridis	Herb
Aster oblongifolius	Herb
Callirhoe involucrata	Herb
Ceanothus herbacesous	Shrub
Echinacea angustifolia	Herb
Kuhnia eupatorioides	Herb
Lespedeza capitata	Herb
Physalis pumila	Herb
Psoralea tenuiflora	Herb
Rhus glabra	Shrub
Rosa arkansana	Shrub
Ruellia humilis	Herb
Salvia pitcheri	Herb
Solidago missouriensis	Herb
Symphoricarpos orbiculatus	Shrub
Vernonia baldwinii	Herb
Quercus rotundifolia	Tree	1.38318	2.38382	0.136721		1.7007
Quercus suber	Tree	1.18341	2.3032	0.290035		1.91116
Quercus faginea	Tree	0.834952	2.14922	0.376577		2.03743
Quercus pyrenaica	Tree	0.731732	2.09342	0.437751		2.14922
Crataegus monogyna	Shrub	0.729076	2.08279	0.292256		2.01745
Pyrus bourgeana	Shrub	0.653609	2.13033	0.344392		2.0465
Celtis africana	Tree		2.06601	0.429752
Cordia caffra	Tree		1.914	0.549861
Ekebergia capensis	Tree		2.02733	0.574263
Erythrina caffra	Tree		1.77859	0.774882
Hyperacanthus amoenus	Tree		1.94808	0.543199
Isoglossa ciliatus	Shrub		1.56416	0.661055
Podocarpus elongatus	Tree		2.44009	0.184691
Teclea natalensis	Tree		1.87713	0.569491
Vepris undulata	Tree		2.01637	0.488551
Zanthoxylum capense	Tree		2.02503	0.414305
Calodendrum capense	Tree		1.65521	0.657152
Celtis africana	Tree		1.84986	0.670617
Curtissia dentata	Tree		2.02319	0.163758
Ekebergia capensis	Tree		2.14691	0.193403
Kiggelaria africana	Tree		1.78042	0.690196
Olea capensis ssp macrocarpa	Tree		2.21824	0.0553783
Podocarpus falcatus	Tree		2.29585	0.0906107
Podocarpus latifolius	Tree		2.48812	0.0253059
Rapanea melanophloeos	Tree		2.42597	0.206556
Rhus chirendensis	Tree		1.99957	0.431203
Scolopia mundii	Tree		2.09366	0.158664
Trichocladus ellipticus	Tree		2.21042	0.142076
Vepris undulata	Tree		1.83505	0.409764
Xymalos monospora	Tree		1.90379	0.344392
Acacia robusta	Tree		2.13549
Adpdytes dimidiata	Tree		2.17522	0.364739
Albizia adinathifolia	Tree		1.98297	0.579784
Balanites maughamii	Tree		2.10347	0.593508
Bequaertiodendron natalense	Tree		2.15107	0.40841
Celtis africana	Tree		1.70421	0.565021
Chaetachme aristata	Tree		2.03905	0.488551
Diospyros natalensis	Tree		2.06298	0.27462
Hymenocardia ulmoides	Tree		2.04769	0.323665
Mimusops obovata	Tree		1.99439	0.398287
Ochna natalitia	Tree		2.03858
Pancovia golungensis	Tree		2.02246	0.310906
Psychotria capensis	Tree		1.82711
Rothmannia globosa	Tree		1.81276	0.500785
Strychnos decussata	Tree		1.98172	0.387212
Strychnos gerrardii	Tree		1.98801	0.229682
Vepris undulata	Tree		2.02273	0.544192
Diospyros whyteana	Tree		2.09691	0.270446
Hartogiella schinoides	Tree		2.30627	0.126781
Maytenus acuminata	Tree		2.19246	0.203033
Maytenus oleodes	Tree		2.30277	0.114944
Olea europaea ssp africana	Tree		2.34352	0.276462
Olinia ventosa	Tree		2.08831	0.46568
Podocarpus elongatus	Tree		2.47886	0.0729847
Brabejum stellatifolium	Tree		2.40012	-0.0644927
Brachylaena neriifolia	Tree		2.14813
Cunonia capensis	Tree		2.26122
Freylinia lanceolata	Tree		2.44129
Ilex mitis	Tree		2.20135	0.333044
Kiggelaria africana	Tree		1.9974	0.396896
Rapanea melanophloeos	Tree		2.11919	0.269746
Rhus tomentosa	Tree		2.20831
Apodytes dimidiata	Tree		2.1986	0.284431
Curtissia dentata	Tree		2.02872	0.173769
Faurea macnaughtonii	Tree		1.98632	0.281942
Ocotea bullata	Tree		2.06905	0.378398
Olea capensis ssp macrocarpa	Tree		2.16622	0.108227
Olinia ventosa	Tree		1.90904	0.458789
Podocarpus falcatus	Tree		2.27984	0.162564
Podocarpus latifolius	Tree		2.34008	0.0827854
Rapanea melanophloeos	Tree		2.03905	0.199481
Trichocladus crinitus	Tree		2.10824	0.139249
Acacia karroo	Tree		2	0.606274
Celtis africana	Tree		1.95156	0.512284
Chaetachme aristata	Tree		1.75129	0.673942
Chionanthus pegleriae	Tree		2.0511	0.294687
Clausena anisata	Tree		1.95273	0.461649
Diospyros inhacaensis	Tree		2.00922
Diospyros natalensis	Tree		2.10791	0.194514
Dovyalis longispina	Tree		2.07109	0.476687
Drypetes natalensis	Tree		2.07572	0.396025
Eugenia woodii	Tree		2.14026	0.289812
Inhambanella henriquesii	Tree		1.99268	0.358506
Sideroxylon inerme	Tree		2.1512
Strychnos henningsii ssp gerrardii	Tree		2.07366	0.254064
Teclea gerrardii	Tree		1.91973	0.551206
Trema orientalis	Tree		1.97798	0.542825
Ziziphus mucronata	Tree		2.14691	0.311754
Cladostemon kirkii	Tree		1.80939	0.770999
Cleistanthus schlechteri	Tree		2.02228	0.32695
Cola greenwayi	Tree		1.95234	0.422918
Combretum fruticosum	Tree		1.9431	0.482445
Croton steenkampianus	Tree		1.89008	0.714162
Dialium schlechteri	Tree		1.92555	0.516403
Drypetes arguta	Tree		2.05948
Erythrophleum lasianthum	Tree		1.83535	0.686815
Newtonia hildebrandtii	Tree		2.12784
Pteleopsis myrtifolia	Tree		2.03152	0.352375
Salacia leptoclada	Tree		1.96819	0.358696
Strychnos decussata	Tree			0.523226
Suregada zanzibariensis	Tree		2.19518	0.414806
Wrightia natalensis	Tree		1.69272	0.67219
Buxus macowanii	Tree		2.25964	0.547036
Cussonia spicata	Tree		2.07058	0.20871
Ekebergia capensis	Tree		2.1986	0.0374265
Harpephyllum caffrum	Tree		2.32422	0.0305997
Hippobromus pauciflorus	Tree		2.05651	0.319938
Hypoestes verticilliaris	Shrub		2.00388	0.279439
Isoglossa ciliatus	Shrub		1.71715	0.635584
Olea capensis	Tree		2.30892	0.139249
Olea europaea ssp africana	Tree		2.27901	0.0257154
Olea woodiana	Tree		2.1986	0.131619
Podocarpus falcatus	Tree		2.39686	0.00817418
Ptaeroxylon obliquum	Tree		1.92996	0.391993
Scolopia zeyheri	Tree		2.25493	0.260787
Sideroxylon inerme	Tree		2.27984	0.269513
Teclea natalensis	Tree		1.77392	0.598791
Trichocladus ellipticus	Tree		2.22403	0.162863
Umtiza listeriana	Tree		1.94386	0.475381
Vepris undulata	Tree		1.80493	0.574379
Zanthoxylum capense	Tree		1.93968	0.426836
Castanopsis sieboldii	Tree		2.19033	0.255273		2.01379	0.654766
Quercus myrsinaefolia	Tree		2.13033	0.322219		2.01579	0.948847
Machilus thunbergii	Tree		2.09691	0.20412		2.01703	0.748188
Neolitsea sericea	Tree		2.07918	0.230449		1.82391	0.522879
Abronia villosa	Herb		1.85387	0.69897		2.65031
Malvastrum rotundifolium	Herb		1.84164	0.642465		2.67025
Geraea canescens	Herb		1.82391	0.732394		2.64933
Camissonia claviformis	Herb		1.88606	0.549003		2.61278
Camissonia brevipes	Herb		1.86967	0.436163		2.55023
Abutilon theophrastii	Herb		1.60206	0.594393		2.54158
Ambrosia trifida	Herb		1.74473	0.644439		2.59329
Chenopodium album	Herb		1.81531	0.580925		2.53275
Polygonum pensylvanicum	Herb		1.77469	0.44248		2.43775
Protea repens	Shrub		2.36568	0.136721		1.73493	0.634325
Protea neriifolia	Shrub		2.34908	0.0374265		1.54854	0.349887
Protea nitida	Shrub		2.40243	0.0128372		1.43642	0.500657
Protea acaulos	Shrub		2.24279	0.09691		1.43845	0.6603
Maytenus oleodes	Shrub		2.25959	0.117271		1.60373	0.585504
Rhus tomentosa	Shrub		2.27623	0.0791812		1.593
Calathea inocephala	Herb	1.41497	1.69461	0.238046		1.83251
Pleiostachya pruinoisa	Herb	1	1.63347	0.181844		2.17026
Psychotria furcata	Shrub	1.07918	1.64345	0.322219		1.91381
Psychotria marginata	Shrub	1.5563	1.90309	0.130334		1.87506
Psychotria limonensis	Shrub	1.5563	1.77815	0.176091		1.87506
Berberis trifoliolata	Shrub	0.968675	2.21467	0.113943
Condalia hookeri	Shrub	0.715545	1.83863	0.380211
Diospyros texana	Shrub	0.592435	1.86967	0.322219
Prosopis glandulosa	Tree	0.832859	1.97469	0.447158
Zanthoxylum fagra	Shrub	0.581346	1.88606	0.361728
Ziziphus obtusifolia	Shrub	0.336432	2.1549
Acer platanoides	Tree		1.68305
Alnus glutinosa	Tree		1.88874
Alnus incana	Tree		1.82607
Amelanchier spicata	Shrub		1.70757
Andromeda polifolia	Shrub		2.11926
Aronia melanocarpa	Shrub		2.03141
Berberis vulgaris	Shrub		1.88081
Betula humilis	Shrub		1.90849
Betula nana	Shrub		2.02938
Betula pendula	Tree		1.88081
Betula pubescens	Tree		1.79934
Cerasus vulgaris	Tree		1.42813
Chamaedaphne calyculata	Shrub		2.00647
Corylus avellana	Shrub		1.5682
Cotoneaster interrigimus	Shrub		1.72754
Crataegus curvisepala	Shrub		1.94448
Crataegus monogyna	Shrub		2.04139
Daphne mezereum	Shrub		1.48996
Euonymus europaeus	Shrub		1.70757
Frangula alnus	Shrub		1.41664
Fraxinus excelsior	Tree		1.92065
Grossularia reclinata	Shrub		1.46389
Juniperus communis	Shrub		1.97543
Ledum palustre	Shrub		1.86332
Lonicera baltica	Shrub		1.86982
Lonicera xylosteum	Shrub		1.60314
Malus domestica	Tree		1.58771
Malus sylvestris	Tree		1.70757
Myrica gale	Shrub		1.99034
Padus avium	Tree		1.59106
Pentaphylloides fruticosa	Shrub		1.69461
Physocarpus opulifolius	Shrub		1.61278
Populus tremula	Tree		1.93802
Prunus spinosa	Shrub		1.75891
Pyrus pyraster	Tree		1.94939
Quercus robur	Tree		1.78319
Rhamnus cathartica	Shrub		1.80618
Ribes alpinum	Shrub		1.79934
Ribes nigrum	Shrub		1.75587
Ribes rubrum	Shrub		1.47567
Ribes spicatum	Shrub		1.41664
Rosa caesia	Shrub		1.92428
Rosa canina	Shrub		1.97497
Rosa ciesielski	Shrub		2.03383
Rosa dumalis	Shrub		1.94645
Rosa glauca	Shrub		1.95521
Rosa majalis	Shrub		1.71181
Rosa mollis	Shrub		1.89209
Rosa rugosa	Shrub		2.07954
Rosa spinisissima	Shrub		1.85552
Rosa subcanina	Shrub		2.02407
Rubus idaeus	Shrub		1.5682
Salix acutifolia	Tree		1.75511
Salix alba	Tree		1.99564
Salix alba fraxinus	Tree		1.88649
Salix aurita	Shrub		1.91908
Salix aurita cinerea	Shrub		1.98677
Salix caprea	Tree		1.77525
Salix cinerea	Shrub		2.00087
Salix daphnoides	Tree		1.97313
Salix dasyclados	Shrub		1.96988
Salix dasyclados phylicifolia	Shrub		2.04844
Salix fragilus	Tree		2.05538
Salix lapponum	Shrub		2.01326
Salix myrsinifolia	Shrub		1.87967
Salix myrtilloides	Shrub		1.81558
Salix pentandra	Tree		1.84323
Salix phylicifolia	Shrub		1.99432
Salix purpurea	Shrub		2.02243
Salix rosmarinifolia	Shrub		2.02119
Salix starkeana	Shrub		1.92942
Salix triandra	Shrub		1.91698
Salix viminalis	Shrub		1.87852
Sambucus nigra	Shrub		1.74194
Sambucus racemosa	Shrub		1.68124
Sorbaria sorbifolia	Shrub		1.60853
Sorbus aria	Tree		1.9345
Sorbus aucuparia	Tree		1.81954
Sorbus intermedia	Tree		1.92428
Swida sanguinea	Shrub		1.67025
Syringa vulgaris	Shrub		1.80618
Taxus baccata	Tree		1.89265
Tilia cordata	Tree		1.40654
Ulmus glabra	Tree		1.58546
Ulmus laevis	Tree		1.7185
Vaccinium myrtillus	Shrub		1.60423
Vaccinium uliginosum	Shrub		1.76193
Viburnum opulus	Shrub		1.75587
Populus tremula	Tree		2.0086	0.332438
Fraxinus excelsior	Tree		1.89653	0.260071
Corylus avellana	Shrub		1.72754	0.311754
Tilia cordata	Tree		1.88024	0.376577
Castanopsis sieboldii	Tree	1.47712
Quercus salicina	Tree	1.38021
Quercus acuta	Tree	1.54158
Machilus thunbergii	Tree	1.32222
Neolitsea sericea	Tree	1.51851
Cinnamomum japonicum	Tree	1.74663
Myrsine seguinii	Tree	1.71265
Symplocos prunifolia	Tree	1.25527
Illicium anisatum	Tree	1.44091
Cleyera japonica	Tree	1.47712
Eurya japonica	Tree	1.47712
Astronium graveolens	Tree	0.944483	1.77469	0.42198	-0.855846
Bauhinia megalandra	Tree	0.977724	1.46597	0.494548	-0.682984
Bursera simaruba	Tree	0.954243	1.70115	0.43177	-0.738207
Capparis flexuosa	Tree	1.07918	1.94692	0.517506	-0.768696
Erythroxylum cumanense	Tree	0.973128	1.82391	0.492987	-0.801489
Erythroxylum densum	Tree	1.07918	1.88273	0.420365	-0.917994
Erythroxylum orinocense	Tree	0.944483	1.6925	0.452004	-0.818863
Eugenia caseariodes	Tree	0.977724	1.80688	0.459672	-0.639827
Sapindus saponaria	Tree	0.977724	1.7122	0.452004	-0.846301
Tabebuia chrysantha	Tree	0.954243	1.64975	0.45372	-0.784783
Chionanthus sp1	Tree	1.1726	2.0317	0.215373
Diplospora malaccensis	Tree	1.35468	2.02811	0.3638
Dipterocarpus sublamellatus	Tree	1.10857	2.12852	0.211921
Elateriospermum tapos	Tree	1.06258	2.06424	0.22763
Eugenia rugosa	Tree	1.3653	2.20358	0.0715138
Ganua sp1	Tree	1.27462	2.29935	0.147676
Homalium dictyoneurum	Tree	1.54407	1.9093	0.275081
Macaranga lowii	Tree	1.27531	1.89765	0.190051
Mangifera foetida	Tree	1.36305	2.15183	0.0881361
Monocarpia marginalis	Tree	1.4188	1.81987	0.55461
Ptychopyxis caput-medusae	Tree	0.849419	2.10356	0.230193
Xanthophyllum stipitatum	Tree	1.16227	2.0923	0.303196
Aporosa bracteosa	Tree		1.89997			1.44404
Aporosa lunata	Tree		2.08778			1.49136
Aporosa microstachya	Tree		1.65995			1.49415
Baccaurea parviflora	Tree		1.94386			1.40993
Baccaurea racemosa	Tree		2.09583			1.34242
Baccaurea reticulata	Tree		2.05998			1.46982
Diospyros cauliflora	Tree		1.86806			1.75891
Diospyros maingayi	Tree		2.28567			1.46389
Diospyros nutans	Tree		2.03105			1.35984
Garcinia bancana	Tree		2.1986			1.60853
Garcinia malaccensis	Tree		2.08566			1.26717
Garcinia small sp	Tree		1.87844			1.50379
Cirsium arvense	Herb		1.79513
Epilobium lirsutum	Herb		1.70446
Urtica dioica	Herb		1.63273
Leontodon autumnalis	Herb		1.48572
Ranunculus repens	Herb		1.63727
Menyanthes trifoliata	Herb		1.62997
Potentilla palustris	Herb		1.80631
Cirsium vulgare	Herb		1.712
Eupatorium cannabinum	Herb		1.53862
Galium aparine	Herb		1.32131
Urtica dioica	Herb		1.55146
Centaurea jacea	Herb		1.72558
Dactylorhiza maculata	Herb		1.65831
Leontodon hispidus	Herb		1.56788
Ononis repens	Herb		1.64026
Plantago lanceolata	Herb		1.67021
Calluna vulgaris	Shrub		2.09765
Genista anglica	Shrub		1.81103
Rumex acetosella	Herb		1.60559
Centaurea jacea	Herb		1.78265
Leucanthemum vulgare	Herb		1.841
Plantago lanceolata	Herb		1.71322
Trifolium pratense	Herb		1.63605
Unidentified composite	Herb		1.73891
Cirsium dissectum	Herb		1.78857
Erica tetralix	Shrub		2.0988
Salix repens	Herb		1.84822
Succisa pratensis	Herb		1.78856
Viola palustris	Herb		1.4607
Aegiphila lhotzkiana	Tree		2.0792	0.426511		1.89209
Annona coriaceae	Tree		2.17321	0.320146		1.79239
Aspidosperma tomentosum	Tree		2.14923	0.0128372		1.85733
Bauhinia holophylla	Tree		2.15534	0.383815		1.86332
Bowdichia virgilioides	Tree		2.22534	0.374748		1.74036
Campomanesia aromatica	Tree		2.17321	0.170262		1.8451
Caryocar brasiliense	Tree		2.07186	0.276462		1.90309
Connarus suberosus	Tree		2.17321	0.187521		1.91381
Davilla rugosa	Tree		2.22012	0.146128		1.78533
Didymopanax vinosum	Tree		2.17025	0.260071		2.07555
Duguetia furfuracea	Tree		2.22272	0.276462		1.76343
Gochnatia floribunda	Tree		2.22534	0.206826		1.98227
Kielmeyera coriacea	Tree		2.31176	0.0374265		1.70757
Miconia albicans	Tree		2.18469	0.164353		1.92428
Miconia ligustroides	Tree		2.11725	0.187521		2.02938
Piptocarpha rotundifolia	Tree		2.20412	0.294466		1.88649
Qualea dichotoma	Tree		2.15534	0.178977		1.88081
Styrax camporum	Tree		2.32221	0.214844		1.59106
Tibouchina stenocarpa	Tree		2.13354	0.206826		2.16435
Tocoyena formosa	Tree		2.19866	0.269513		1.61278
Callitris intratropica	Tree		2.34679	0.045323	-1.16115	1.5563
Cochlospermum fraseri	Tree	0.518514	1.77728	0.245513	-1.09691	2.1959
Corymbia foelscheana	Tree	0.991226	2.34679	-0.107905	-1.4318	1.77085
Melaleuca viridiflora	Tree	1.0086	2.36653	-0.113509	-1.4318	1.78533
Planchonia careya	Tree	0.929419	2.00436	0.20412	-1.07058	2
Syzygium eucalyptoides ssp bleeseri	Tree	1.05308	2.10237	0.064458	-1.19382	1.81954
Terminalia ferdinandiana	Tree	0.681241	2.08092	0.181844	-1.09151	2.03342
Xanthostemon paradoxus	Tree	1.02119	2.13668	0.0606978	-1.3098	1.92942
Brachychiton megaphyllus	Tree	0.845098	1.9914	0.305351	-0.896196	2.03342
Buchanania obovata	Tree	1.04139	2.21467	0.0606978	-1.14267	1.80618
Erythrophleum chlorostachys	Tree	0.977724	2	0.357935	-1.09151	2.04139
Eucalyptus tetrodonta	Tree	0.913814	2.25964	-0.148742	-1.48149	1.79239
Planchonia careya	Tree	0.845098	1.92445	0.260071	-0.954677	2.1038
Syzygium suborbiculare	Tree	0.977724	2.14267	0.0791812	-1.20066	1.91381
Terminalia ferdinandiana	Tree	0.716003	2.00436	0.178977	-1.04576	1.97313
Eucalyptus clavigera	Tree		2.14569	0.0170333		1.9345
Eucalyptus miniata	Tree		2.09313	0.230449		2.11727
Acacia auriculiformis	Tree	1	2.02228	0.394452	-0.920819	2.13354
Lophostemon lactifluus	Tree	0.939519	2.08092	-0.0177288	-1.3098	1.83251
Melaleuca viridiflora	Tree	0.991226	2.35655	-0.21467	-1.55284	1.80618
Ficus racemosa	Tree	0.778151	1.81816	0.382017	-0.759451	2.39794
Ficus scobina	Tree	0.681241	1.92082	0.478566	-0.730487	2.18184
Mallotus nesophilus	Tree	0.69897	1.87943	0.350248	-0.832683	2.24304
Melaleuca leucadendra	Tree	0.913814	2.17393	0.0211893	-1.08619	2.11059
Terminalia microcarpa	Tree	0.845098	1.92082	0.357935	-0.774691	2.22272
Wrightia pubescens	Tree	0.832509	1.7167	0.510545	-0.785156	2.26007
Acantholimon diapensioides	Herb		2.11394
Ajania tibetica	Shrub		2.04179
Allium platyspathum	Herb		2.06595
Allium sp	Herb		1.55267
Artemisia leucotricha	Shrub		2
Artemisia pamirica	Shrub		1.84757
Artemisia rhodantha	Shrub		1.94448
Astragalus tibetanus	Herb		1.61805
Christolea crassifolia	Herb		2.06258
Comarum salesovianum	Shrub		1.54283
Corydalis stricta	Herb		1.96379
Dracocephalum heterophyllum	Shrub		1.83569
Ephedra regeliana	Shrub		1.88138
Gentiana karelinii	Herb		1.62737
Gentiana leucomelaena	Herb		1.81954
Glaux maritima	Herb		1.88252
Gypsophila capituliflora	Herb		2.07078
Halerpestes sarmentosa	Herb		1.76864
Hedysarum minjanense	Herb		1.69197
Knorringia pamiricum	Herb		2.06558
Krascheninnikovia ceratoides	Shrub		1.97035
Ligularia alpigena	Herb		1.8055
Lindelofia pterocarpa	Herb		1.78817
Lomatocarpa albomarginata	Herb		1.74036
Macrotomia euchroma	Herb		2.09691
Myricaria squamosa	Shrub		2.04139
Oxytropis chiliophylla	Herb		1.5611
Oxytropis globiflora	Herb		1.69984
Parnassia laxmannii	Herb		1.72099
Pedicularis ludwigii	Herb		1.84572
Pentaphylloides dryadanthoides	Shrub		1.94448
Plantago arachnoidea	Herb		1.88195
Potentilla anserina	Herb		1.89265
Potentilla malacotricha	Herb		1.90956
Potentilla moorcroftii	Herb		2.10517
Potentilla multifida	Herb		2.00732
Primula algida	Herb		2.055
Primula pamirica	Herb		1.5966
Pyrethrum djilgense	Herb		2.02036
Ranunculus krasnovii	Herb		1.6637
Ranunculus pseudohirculus	Herb		1.78958
Saussurea salsa	Herb		1.87679
Scrophularia pamirica	Herb		1.86806
Senecio krascheninnikovii	Herb		1.77743
Serratula procumbens	Herb		1.91487
Silene graminifolia	Herb		1.716
Stellaria winkleri	Herb		1.64345
Suaeda olufsenii	Herb		2.2615
Taraxacum dissectum	Herb		1.77887
Taraxacum leucantum	Herb		1.82282
Viola tianschanica	Herb		1.79588
Zygophyllum rosowii	Herb		2.20629
Androsace akbaitalensis	Herb		1.59218
Bistorta viviparum	Herb		1.91009
Clematis tangutica	Shrub		1.91487
Draba korshinskyi	Herb		1.46687
Draba pamirica	Herb		1.81558
Dracocephalum paulsenii	Herb		1.80821
Erigeron heterochaeta	Herb		1.77452
Erigeron poncinsii	Herb		1.83885
Lloydia serotina	Herb		2.21906
Oxygraphis glacialis	Herb		1.83569
Oxyria digyna	Herb		1.64836
Oxytropis incanescens	Herb		2.00732
Papaver involucratum	Herb		1.85794
Primula macrophylla	Herb		2.02612
Rheum spiciforme	Herb		2.06595
Rhodiola gelida	Herb		1.98363
Rhodiola pamiroalaica	Herb		1.64345
Saxifraga hirculus	Herb		1.93551
Sibbaldia tetrandra	Herb		1.94939
Smelowskia pectinata	Herb		1.61172
Swertia marginata	Herb		1.73878
Valeriana fedtschenkoi	Herb		1.71096
Chenopodium foliosum	Herb		1.82151
Geranium himalayense	Herb		1.67852
Leontopodium ochroleucum	Herb		1.90255
Lonicera semenovii	Shrub		1.89154
Potentilla pamirica	Herb		2.10992
Ranunculus rufosepalus	Herb		1.73799
Rhodiola heterodonta	Herb		2.01368
Sophiopsis annua	Herb		1.89982
Impatiens noli-tangere	Herb		1.15836	0.599883
Capsella bursa-pastoris	Herb		1.38917	0.63749
Lepidium ruderale	Herb		1.70415	0.604226
Thlaspi arvense	Herb		1.60746	0.606381
Spergula arvensis	Herb		1.95424	0.471292
Stellaria media	Herb		1.48855	0.596597
Chenopodium album	Herb		1.23805	0.647383
Fumaria officinalis	Herb		1.36361	0.692847
Erodium cicutarium	Herb		1.26007	0.294466
Polygonum aviculare	Herb		1.47276	0.691081
Melampyrum pratense	Herb		1.68664	0.519828
Spergularia rubra	Herb		1.91062	0.432969
Leucanthemum vulgare	Herb		1.47567	0.340444
Campanula sibirica	Herb		1.9284	0.232996
Hyoscyamus niger	Herb		1.24797	0.732394
Aegopodium podagraria	Herb		1.51851	0.610837
Vincetoxicum hirundinaria	Herb		1.50515	0.64836
Antennaria dioica	Herb		1.60206	0.164353
Anthemis tinctoria	Herb		1.87564	0.278754
Arctium tomentosum	Herb		1.30103	0.674861
Artemisia absinthium	Herb		1.38202	0.344392
Artemisia vulgaris	Herb		1.53148	0.367356
Aster amellus	Herb		1.99078	0.324282
Cacalia hastata	Herb		1.27416	0.613249
Cirsium arvense	Herb		1.5832	0.287802
Echinops ritro	Herb		2.07918	0.162019
Inula hirta	Herb		1.67394	0.450249
Tanacetum vulgare	Herb		1.63144	0.381211
Myosotis palustris	Herb		1.39794	0.338456
Onobrychis arenaria	Herb		2.04961	0.448706
Bunias orientalis	Herb		1.617	0.71265
Dianthus acicularis	Herb		1.8451	0.325519
Dianthus versicolor	Herb		1.75051	0.312857
Sedum acre	Herb		2.30103	0.18117
Sedum purpureum	Herb		1.80618	0.395672
Knautia arvensis	Herb		1.58883	0.332438
Lathyrus vernus	Herb		1.30103	0.653213
Lupinus polyphyllus	Herb		1.50379	0.474216
Origanum vulgare	Herb		1.68842	0.25042
Trifolium pratense	Herb		1.58883	0.568202
Trifolium repens	Herb		1.55267	0.558709
Herniaria glabra	Herb		2.04139	0.31597
Betonica officinalis	Herb		1.50515	0.40824
Glechoma hederaceae	Herb		1.33646	0.719331
Chamaenerion angustifolium	Herb		1.5563	0.521138
Plantago media	Herb		1.58206	0.262451
Polygala sibirica	Herb		1.84136	0.267138
Polygala vulgaris	Herb		1.83315	0.375581
Polygonum bistorta	Herb		1.38021	0.321205
Rumex acetosella	Herb		1.82995	0.225309
Trientalis europaea	Herb		1.3483	0.559907
Adonis vernalis	Herb		1.84011	0.448706
Anemone sylvestris	Herb		1.70586	0.372912
Aquilegia vulgaris	Herb		1.53148	0.365488
Caltha palustris	Herb		1.44716	0.632457
Thalictrum simplex	Herb		1.64444	0.399674
Trollius europaeus	Herb		1.63043	0.620136
Filipendula ulmaria	Herb		1.72591	0.271842
Filipendula vulgaris	Herb		1.6721	0.278754
Fragaria vesca	Herb		1.41497	0.302331
Fragaria viridis	Herb		1.71265	0.262451
Potentilla erecta	Herb		1.50651	0.348305
Sanguisorba officinalis	Herb		1.4843	0.276462
Galium boreale	Herb		1.83315	0.311754
Galium mollugo	Herb		1.41497	0.468886
Galium verum	Herb		1.52892	0.146727
Chrysosplenium alternifolium	Herb		1.26482	0.376017
Digitalis grandiflora	Herb		1.51983	0.334454
Verbascum thapsus	Herb		1.46982	0.443338
Veronica chamaedrys	Herb		1.50515	0.247973
Veronica longifolia	Herb		1.80482	0.241716
Veronica spicata	Herb		1.89098	0.283301
Viola canina	Herb		1.52244	0.614897
Viola mirabilis	Herb		1.233	0.271842
Allium rubens	Herb		2.05346	0.235439
Allium strictum	Herb		1.92012	0.238323
Calla palustre	Herb		1.51983	0.614897
Convallaria majalis	Herb		1.36922	0.582063
Maianthemum bifolium	Herb		1.41497	0.396199
Polygonatum officinale	Herb		1.41996	0.453318
Lilium martagon	Herb		1.58995	0.575188
Neottianthe cucullata	Herb		1.34044	0.58106
Platanthera bifolia	Herb		1.55023	0.419956
Linnaea borealis	Shrub		1.47712	0.0530784
Genista tinctoria	Shrub		1.77815	0.494155
Moneses uniflora	Shrub		1.75587	0.30963
Orthilia secunda	Shrub		1.93298	0.173186
Pyrola media	Shrub		1.68842	0.181844
Pyrola minor	Shrub		1.52763	0.201397
Pyrola rotundifolia	Shrub		1.69108	0.161368
Vaccinium myrtillus	Shrub		1.35793	0.344392
Sparganium erectum	Herb		1.73755	0.445666
Typha latifolia	Herb		2.09665	0.497606
Abies lasiocarpa	Tree	1.98227	2.40561	0.0128372		1.0607	0.544068
Acomastylis rosii	Herb	0.30103	1.92445	0.39794		2.08063	1.32015
Arctostaphylos uva-ursi	Shrub	1.25527	2.10568	0.0899051		1.50243	0.724276
Bistorta bistortoides	Herb	0.30103	1.91721	0.591065		2.13354	1.45332
Picea engelmanii	Tree	1.95424	2.48545	0.0128372		1.06446	0.50515
Pinus flexilis	Tree	1.5563	2.56384	0.049218		1.4133	0.60206
Psychrophila leptosepala	Herb	0.39794	1.89963	0.462398		2.04139	1.18469
Salix glauca	Tree	0.477121	1.9108	0.419956		2.09447	1.24797
Salix planifolia	Tree	0.477121	1.91009	0.426511		2.18013	1.39445
Vaccinium myrtillus	Shrub	0.544068	1.767	0.369216		2.01912	1.02531
Acer rubrum	Tree	0.716003	1.79588	0.263636		2.09691	1.10721
Eupatorium rugesum	Herb	0.681241	1.32883	0.593286		2.58206	1.65031
Galax aphylla	Herb	1.25527	1.90309	-0.05061		1.89209	0.986772
Helianthus microcephalus	Herb	0.612784	1.60033	0.418301		2.4143	1.55388
Kalmia latifolia	Tree	1.5563	2.02457	0.0606978		1.63649	0.94939
Liriodendron tulipifera	Tree	0.724276	1.78252	0.350248		2.23045	1.14613
Pinus rigida	Tree	1.51851	2.31069	0.064458		1.74586	0.716003
Pinus strobus	Tree	1.32222	2.03621	0.130334		1.70415	0.716003
Podophyllum peltatum	Herb	0.477121	1.4908	0.618048		2.41664	1.42813
Quercus coccinea	Tree	0.755875	1.92812	0.238046		2.04532	1.0607
Rhododendron maximum	Tree	1.68124	2.31069	-0.0655015		1.5302	0.579784
Robinia pseudoacacia	Tree	0.662758	1.5784	0.636488		2.38578	1.50515
Tsuga canadensis	Tree	1.77815	2.08831	-0.00436481		1.64246	0.491362
Veratrum parviflorum	Herb	0.556303	1.52724			2.16137	1.26951
Atriplex canescens	Herb	0.845098	2.40121	0.322219		1.89763	1.08991
Baccharis angustifolia	Tree	0.39794	1.97864	0.290035		2.29623	1.23805
Eleagnus angustifolia	Tree	0.477121	1.90658	0.599883		2.24329	1.36922
Gutierrezia sarothrae	Shrub	0.778151	2.46982	0.225309		1.77085	1.15534
Juniperus monosperma	Tree	1.89209	2.89279	0.0681859		1.06446	0.681241
Larrea tridentata	Shrub	1.07918	2.4023	0.287802		1.92942	0.892095
Pinus edulis	Tree	1.81954	2.61083	0.0253059		1.1038
Populus fremontii	Tree	0.477121	2.07676	0.220108		2.07918	1.16435
Prosopis glandulosa	Tree	0.845098	2.29073	0.396199		1.96379	0.939519
Quercus turbinella	Tree	0.90309	2.18046	0.187521			1.19312
Lyonia lucida	Shrub	1.29003	2.37572	-0.0362122		1.43457	0.763428
Persea borbonia	Shrub	1.25527	2.04576	0.214844		1.79239	0.826075
Pinus palustris	Tree	1.50515	2.40671	-0.0861861		1.22272	0.556303
Pinus serotina	Tree	1.43136	2.44491	-0.0861861		1.19866	0.69897
Pterocaulon pycnostachyum	Herb	0.70757	1.90798	0.294466		2.00561	1.18752
Quercus laevis	Tree	0.880814	2.01055	0.0606978		1.81823	0.799341
Quercus virginia var geminata	Tree	1.04139	2.20135	0.187521		1.90526	0.755875
Taxodium distichum	Tree	0.812913	2.10791	0.075547		1.81158	1.01284
Vaccinium arboreum	Shrub	1.04139	2.09637	0.0827854		1.72016	0.80618
Vaccinium corymbosum	Shrub	0.875061	2.00922	0.0899051		1.78247	1.1038
Aspidosperma album	Tree	1.51851	2.08302	0.0293838		1.71767
Bellucia grossularioides	Tree	0.924279	2.10735	0.227887		2.04727	0.897627
Caraipa heterocarpa	Tree	1.58546	2.16877	-0.0315171		1.58883
Cecropia ficifolia	Tree	0.431364	1.83983	0.392697		2.40175	1.25527
Clidemia sericea	Tree	0.70757	1.89825	0.217484		2.06258
Eperua leucantha	Tree	1.64345	2.02182	0.09691		1.54531
Eperua purpurea	Tree	1.63347		0.181844		1.74115
Goupia glabra	Tree	1.0569	1.88639	0.178977		1.99564
Leguminosae sp	Tree	1.69897	2.14206	0.330414		1.67852
Licania heteromorpha	Tree	1.60206	2.17198	0.113943		1.73078	0.716003
Manihot esculenta	Shrub	0.176091	1.56051	0.599883		2.67015	1.52244
Miconia dispar	Tree	1.07918	2.04431	0.201397		1.96284	0.716003
Micrandra sprucei	Tree	1.69897	2.23359	0.0334238		1.63649
Micropholis magueirei	Tree	1.70329	2.25727	-0.09691
Neea obovata	Tree	1.07918	1.98674	0.264818		1.81291
Ocotea costulata	Tree	1.59106	2.11464	0.176091		1.65225	0.69897
Protium sp1	Tree	1.51851	2.06248	-0.0655015		1.54033	0.778151
Protium sp2	Tree	1.54407	2.08619	0.247973		1.82737	0.763428
Protium sp3	Tree	1.70757	2.23582	0.0128372		1.51851
Retiniphyllum truncatum	Tree	1.21748	2.08197	-0.167491		1.66745
Rhodognaphalopsis humilis	Tree	1.38021	2.12378	-0.107905		1.67394
Solanum straminifolia	Tree	0.30103	1.54151	0.593286		2.57807	1.53148
Vismia japurensis	Tree	0.838849	1.97716	0.214844		2.14737	0.968483
Vismia lauriformis	Tree	0.653213	1.94195	0.252853		2.20222	1.04139
Acer rubrum	Tree	0.740363	1.77989	0.322219		2.03342	1.09342
Acer saccharum	Tree	0.740363	1.90309	0.267172		2	0.845098
Andromeda glaucophylla	Shrub	1.11394	2.12057	0.143015		1.84696
Arisaema triphyllum	Herb		1.42022	0.803457
Baptisia leucophaea	Herb	0.544068	1.97359	0.555094		2.2014	1.55991
Betula nigra	Tree	0.716003	1.92812	0.357935		2.07188
Betula pumilla	Tree	0.778151	2.03141	0.178977		1.82737
Carya ovata	Tree	0.748188	1.95078	0.296665		1.95904
Caulophyllum thalictroides	Herb		1.37161	0.764923		2.40483
Celtis occidentalis	Tree	0.740363	1.91721	0.378398		2.06819
Chamaedaphne calyculata	Shrub	1.11394	1.93952	0.075547		1.84572
Cornus florida	Tree	0.748188	1.96658	0.146128		1.92942
Cornus racemosa	Shrub	0.778151	1.91009	0.161368		1.97772
Dentaria laciniata	Herb	0.0413927	1.52724	0.724276		2.63548
Echinacea purpurea	Herb	0.60206	1.8911	0.176091		2.08955	1.23553
Erythronium americanum	Herb	0.278754	1.65365	0.623249		2.41996	1.716
Fraxinus americana	Tree	0.755875	1.86012	0.296665		2.08279
Ilex verticillata	Shrub	0.778151	1.95713	0.190332		1.86213
Juglans nigra	Tree	0.69897	1.5157	0.471292		2.24304
Juniperus virginiana	Tree		2.52288	0.214844		1.51851
Larix decidua	Tree	0.778151	1.85699	0.322219		2.0086
Larix laricina	Tree	0.778151	2.07918	0.155336		1.7185
Lonicera bella	Shrub	0.826075	1.92082	0.278754		2.07188
Picea glauca	Tree	1.77815	2.45593	0.0934217		1.36173	0.60206
Picea mariana	Tree	1.77815	2.46852	0.0827854		1.5682
Pinus banksiana	Tree	1.43136	2.38722	0.0934217		1.49136	0.778151
Pinus resinosa	Tree	1.5563	2.46852	0.0681859		1.38021
Pinus strobus	Tree	1.32222	2.13077	0.230449		1.65321	0.672098
Pinus sylvestris	Tree	1.43136	2.46852	0.143015		1.54407	0.792392
Podophyllum peltatum	Herb	0.477121	1.51004	0.650308		2.38739
Populus deltoides	Tree	0.69897	1.95861	0.372912		2.20952	1.14613
Populus tremuloides	Tree	0.69897	1.91721	0.344392		2.15229	1.3483
Prunus serotina	Tree	0.740363	2.00436	0.31597		2.09691
Quercus ellipsoidalis	Tree	0.778151	2.02228	0.322219		2.09691	1.11727
Quercus macrocarpa	Tree	0.778151	1.9431	0.371068		2.17435
Rhamnus cathartica	Shrub	0.832509	1.9393	0.361728		2.13033
Sanguinaria canadensis	Herb	0.60206	1.49349	0.729165		2.40654	1.81291
Sarracenia purpurea	Herb	1.47712	2.10721	0.0569049		1.35793
Silphium integrifolium	Herb	0.60206	1.9345	0.220108		2.06446	1.28103
Silphium terebinthinaceum	Herb	0.477121	1.87615	0.158362		2.24304	1.24551
Thuja occidentalis	Tree	1.68124	2.3483	-0.119186		1.50515
Trillium grandiflora	Herb	0.568202	1.44733	0.71265		2.32015
Ulmus americana	Tree	0.763428	2.07572	0.285557		2.06446
Acer negundo	Tree		1.56864	0.39794	-0.769551
Acer pensylvanicum	Tree		1.47756	0.278754	-0.568636
Acer rubrum	Tree		1.88606	0.30103	-0.721246
Acer saccharum	Tree		1.67162	0.342423	-0.552842
Rhus typhina	Tree		1.81816	0.491362	-0.408935
Alnus rugosa	Tree		1.77728	0.477121	-0.657577
Betula alleghaniensis	Tree		1.66354	0.342423	-0.769551
Betula papyrifera	Tree		1.86328	0.342423	-0.677781
Carpinus caroliniana	Tree		1.73283	0.30103	-0.744727
Ostrya virginiana	Tree		1.56864	0.342423	-0.60206
Cornus alternifolia	Tree		1.60206	0.230449	-0.958607
Fagus grandifolia	Tree		1.73283	0.322219	-0.769551
Quercus alba	Tree		1.68194	0.342423	-0.677781
Quercus rubra	Tree		1.73993	0.255273	-0.69897
Quercus macrocarpa	Tree		1.98297	0.322219	-0.721246
Carya cordiformis	Tree		1.64397	0.414973	-0.49485
Carya ovata	Tree		1.7167	0.342423	-0.638272
Juglans cinerea	Tree		1.78516	0.414973	-0.408935
Fraxinus americana	Tree		1.81816	0.322219	-0.455932
Fraxinus nigra	Tree		1.85699	0.322219	-0.920819
Fraxinus pennsylvanica	Tree		1.9431	0.255273	-0.677781
Prunus serotina	Tree		1.77728	0.431364	-0.853872
Prunus pennsylvanica	Tree		1.69897	0.380211	-0.69897
Prunus virginiana	Tree		1.92445	0.447158	-0.920819
Malus sp	Tree		1.8962	0.39794	-0.853872
Populus balsamifera	Tree		1.85078	0.30103	-0.537602
Populus deltoides	Tree		1.85078	0.380211	-0.638272
Populus grandidentata	Tree		1.7986	0.39794	-0.619789
Populus tremuloides	Tree		1.8962	0.414973	-0.619789
Salix nigra	Tree		1.74715	0.39794	-0.886057
Tilia americana	Tree		1.73993	0.477121	-0.431798
Ulmus americana	Tree		1.79317	0.380211	-0.638272
Ulmus rubra	Tree		1.77728	0.39794	-0.744727
Ulmus thomasii	Tree		1.80688	0.361728	-0.468521
Acacia mimula	Tree		2.26962	0.378216
Buchanania obovata	Tree		2.11805	0.243658
Erythrophleum chlorostachys	Tree		1.96344	0.373157
Eucalyptus clavigera	Tree		2.26761	0.0843379
Eucalyptus miniata	Tree		2.25959	0.0460447
Eucalyptus porrecta	Tree		2.10888	0.0892868
Eucalyptus tectifica	Tree		2.11957	0.203848
Eucalyptus tetradonta	Tree		2.34668	-0.0417302
Livistona humilis	Tree		2.37212	0.0525016
Planchonia careya	Tree		2.05306	0.308564
Xanthostemon paradoxus	Tree		2.11126	0.171141
Acacia dimidiata	Shrub		2.30016	0.333649
Buchanania obovata	Tree		2.20761	0.0640834
Eucalyptus bleeseri	Tree		2.35952	-0.0452752
Eucalyptus conferiflora	Tree		2.14752	0.0696681
Eucalyptus miniata	Tree		2.32698	0.0392819
Eucalyptus tectifica	Tree		2.32057	0.0301948
Eucalyptus tetrodonta	Tree		2.40506	-0.0346807
Grevillea pyramidalis	Shrub		2.98716	-0.253366
Lysiphyllum cunninghamii	Tree		2.15927	0.185542
Petalostigma quadriloculare	Shrub		2.30627	-0.162412
Planchonia careya	Tree		2.20482	0.257918
Acacia holosericea	Tree		2.44612	0.289589
Carissa lanceolata	Shrub		2.34969	0.108565
Eucalyptus brevifolia	Tree		2.4681	-0.0858332
Eucalyptus pruinosa	Tree		2.38265	0.0265333
Eucalyptus pruinosa	Tree		2.34775	0.122216
Eucalyptus tectifica	Tree		2.42174	0.0398106
Eucalyptus terminalis	Tree		2.41266	-0.0455967
Hakea arborescens	Tree		2.6038	-0.247184
Lysiphyllum cunninghamii	Tree		2.14388	0.119586
Melaleuca sp	Shrub		2.78252	0.0103
Cochlospermum fraseri	Tree		2.06651	0.149219
Cycas armstrongii	Shrub		2.16685	0.323046
Erythrophleum chlorostachys	Tree		2.00524	0.362294
Eucalyptus miniata	Tree		2.29814	0.0402066
Eucalyptus nesophilla	Tree		2.20204	0.103633
Eucalyptus tetrodonta	Tree		2.34135	0.0400746
Livistona humilis	Tree		2.30277	0.243038
Persoonia falcata	Shrub		2.31876	-0.138466
Eucalyptus brevifolia	Tree		2.46471	-0.0449138
Eucalyptus terminalis	Tree		2.45346	0.0138901
Grevillea dimidiata	Shrub		2.52288	-0.111821
Hakea leucoptera	Tree		3.16749	-0.272459
Lysiphyllum cunninghamii	Tree		1.99827	0.390759
Terminalia arostrata	Tree		2.35655	0.0285713
Terminalia canescens	Tree		2.28316	-0.0186345
Agrimonia gryposepala	Herb		1.68613
Asclepias syriaca	Herb		1.73518
Aster acuminatus	Herb		1.34104
Brassica oleracea	Herb		1.45593
Centaurea nigra	Herb		1.82681
Chrysanthemum leucanthemum	Herb		1.767
Cichorium intybus	Herb		1.75696
Epilobium glandulosum	Herb		1.59176
Epipactis helleborine	Herb		1.42713
Erigeron strigosus	Herb		1.46597
Galeopsis tetrahit	Herb		1.64397
Hieracium scabrum	Herb		1.33255
Hypericum perforatum	Herb		1.61439
Impatiens capensis	Herb		1.2652
Lobelia inflata	Herb		1.39469
Lythrum salicaria	Herb		1.78516
Maianthemum canadense	Herb		1.46218
Melilotus alba	Herb		1.72125
Oenothera blennis	Herb		1.71444
Oenothera perennis	Herb		1.31247
Oxalis stricta	Herb		1.23882
Plantago major	Herb		1.72125
Polygonum persicaria	Herb		1.67778
Potentilla simplex	Herb		1.50307
Prunella vulgaris	Herb		1.42251
Pyrola elliptica	Herb		1.6968
Rudbeckia hirta	Herb		1.83565
Solidago canadensis	Herb		1.66756
Sonchus arvensis	Herb		1.6925
Spiraea tomentosa	Shrub		1.75449
Trifolium pratense	Herb		1.72354
Veronica officinalis	Herb		1.5817
Acer rubrum	Tree	0.778151	1.84662	0.324282	-1.03152	1.92766
Alnus rugosa	Tree	0.778151	1.9576	0.403121	-0.995679	2.03576
Andromeda glaucophylla	Shrub	1.25527	2.37278	0.0569049	-1.20066	1.83806
Aronia melanocarpa	Shrub	0.778151	1.98842	0.240549	-0.856985	2.09624
Betula populifolia	Tree	0.778151	1.76675	0.252853	-1.02228	2.08849
Betula pumila	Tree	0.778151	1.93263	0.257679	-0.978811	1.88086
Chamaedaphne calyculata	Shrub	1.25527	2.07258	0.133539	-1.09691	2.19748
Comptonia peregrina	Tree	0.778151	1.87539	0.344392	-1.11351	2.21887
Gaylussacia baccata	Shrub	0.778151	1.82961	0.220108	-1.08092	2.09448
Ilex verticillata	Shrub	0.778151	1.71656	0.403121	-1.01323	2.1661
Kalmia angustifolia	Tree	1.25527	2.07816	0.0863598	-1.14267	1.85561
Kalmia polifolia	Tree	1.25527	2.15431	0.113943	-1.1549	2.19591
Larix laricina	Tree	0.778151		0.10721	-1.09691	1.82308
Ledum groenlandicum	Shrub	1.25527	2.05212	0.149219	-1.0655	2.01693
Nemopanthus mucronata	Shrub	0.778151	1.79696	0.209515	-1	2.02735
Picea glauca	Tree	1.47712		0.149219	-0.987163	1.68276
Picea mariana	Tree	1.47712		0.00860017	-1.0655	1.43572
Pinus strobus	Tree	1.25527		0.0863598	-1.00877	1.55382
Populus tremuloides	Tree	0.778151	1.96112	0.287802	-1.05061	1.93949
Rubus hispidus	Tree	0.778151	1.84044	0.305351	-0.910095	2.18225
Salix fragilis	Tree	0.778151	1.98219	0.424882	-0.623423	1.99558
Sarracenia purpurea	Herb	1.47712	1.94503	0.0374265	-1.07058	1.47326
Spiraea alba	Shrub	0.778151	1.90945	0.318063	-0.950782	2.1661
Spiraea tomentosa	Shrub	0.778151	1.87642	0.269513	-0.725842	2.20848
Thuja occidentalis	Tree	1.25527		0.10721	-0.89279	1.5112
Ulmus americana	Tree	0.778151	1.85557	0.287802	-0.844664	1.88766
Vaccinium myrtilLoides	Shrub	0.778151	1.94774	0.187521	-1.1549	2.09205
Viburnum cassinoides	Shrub	0.778151	1.94248	0.318063	-0.974694	1.91618
Beureria cumanensis	Tree	0.929419	1.93554	0.458133		2.06009
Capparis verrucosa	Shrub	1.07918	2.05061	0.49912		1.78824
Capparis aristiguetae	Shrub	1.07918	2.16115	0.345502		1.70217
Coursetia arborea	Tree	0.778151	1.57187	0.498335		2.26698
Lonchocarpus dipteroneurus	Tree	0.845098	1.61618	0.610519		2.35694
Morisonia americana	Tree	1.07918	2.16749	0.418122		1.73014
Pithecellobium dulce	Tree	0.929419	1.82102	0.413197		2.12837
Pithecellobium ligustrinum	Tree	0.977724	1.81248	0.543742		2.15131
Aspidosperma album	Tree		2.26761	0.158061	-1.11919
Catostemma sp	Tree		2.3279	0.0153598	-1.17393
Clusia sp	Tree		2.3279	0.0374265	-1.27572
Heteropteris sp	Tree		2.22185	0.148294	-1.24413
Hirtella punctillata	Tree		2.31876	-0.274905	-1.50864
Humiria balsamifera	Tree		2.30103	-0.161151	-1.36653
Macairea rufescens	Tree		2.35655	-0.107349	-1.56864
Mouriri incitheca	Tree		2.56864	-0.357535	-1.65758
Ocotea esmereldana	Tree		2.25964	-0.0996329	-1.23657
Remijia morilloi	Tree		2.55284	-0.388277	-1.5376
Retiniphyllum concolor	Tree		2.21467	-0.0931265	-1.4437
Rodognaphalopsis discolor	Tree		2.56864	-0.223299	-1.46852
Allocasuarina pusilla	Shrub		2.58503	0.0253059	-1.33724
Banksia marginata	Shrub		2.34679	-0.200659	-1.92082
Banksia ornata	Shrub		2.42022	-0.173925	-1.79588
Calytrix alpestris	Shrub		2.67778	0.0170333	-1.34679
Hibbertia riparia	Shrub		2.27572	0.0334238	-1.3279
Hibbertia sericea	Shrub		2.67778	0.0211893	-1.34679
Phyllota remota	Shrub		2.25181	0.155336	-1.18046
Xanthorrhoea australis	Shrub		2.74473	-0.327902	-1.85387
Baeckea crassifolia	Shrub		2.5376	-0.0268721	-1.40894
Eucalyptus foecunda	Tree		2.52288	-0.00436481	-1.284
Eucalyptus incrassata	Tree		2.65758	-0.107905	-1.5376
Hakea muellerana	Shrub		2.49485	-0.267606	-1.74473
Melaleuca uncinata	Shrub		2.65758	0.09691	-1.25181
Banksia marginata	Shrub		2.17393	-0.0705811	-1.46852
Eucalyptus baxteri	Tree		2.39794	-0.0861861	-1.48149
Eucalyptus obliqua	Tree		2.35655	-0.0268721	-1.33724
Leptospermum myrsinoides	Shrub		2.17393	0.0334238	-1.3279
Adinandra dumosa	Tree		2.04096			1.95424	0.992465
Dillenia suffruticosa	Shrub		1.93181			2.16732	1.02243
Melastoma malabathricum	Shrub		1.88606			2.17319	0.838219
Macaranga heynei	Tree		1.82681			2.14613	0.872156
Mallotus paniculatus	Tree		1.82974			2.31806	1.15703
Trema tomentosa	Tree		1.69037			2.31387	1.25411
Aconogonon campanulatum	Herb		1.71158	0.631626		2.37193
Anemone rupicola	Herb		1.91265	0.413691		2.03841
Bistorta amplexicaulis	Herb		1.67637	0.581525		2.33597
Cremanthodium pinnatifidum	Herb		1.52672	0.620094		2.44361
Lagotis kunawarensis	Herb		1.7693	0.555826		2.41244
Picrorhiza scrophulariiflora	Herb		1.69983	0.588698		2.43613
Potentilla contigua	Herb		1.75429	0.477723		2.30401
Potentilla peduncularis	Herb		1.88822	0.403794		2.19478
Rheum acuminatum	Herb		1.57241	0.68287		2.40731
Rheum nobile	Herb		1.78195	0.54285		2.21488
Rhododendron anthopogon	Shrub		2.24351	0.310633		1.52331
Salix anticecrenata Monadelpha	Shrub		1.9257	0.476911		2.03859
Saussurea gossypiphora	Herb		1.83858	0.492977		2.42411
Swertia acaulis	Herb		1.80381	0.386778		2.18612
Ipomoea carnea	Shrub
Jatropha gossypifolia	Shrub
Alternanthera crucis	Herb
Prosopis juliflora	Tree
Capparis odoratissima	Tree
Achillea millefolium	Herb		1.88606	0.40824		2.42144	1.24304
Agastache foeniculum	Herb		1.96658	0.436163		2.25873
Ambrosia artemisiifolia	Herb	0.1749	1.88941	0.40654		2.54834	1.41664
Anemone cylindrica	Herb	0.321028	1.97062	0.220108		2.2169	1.10721
Asclepias syriaca	Herb	0.147316	1.8041	0.434569		2.45358	1.44871
Asclepias tuberosa	Herb		1.91721	0.32838		2.13586	1.27646
Aster azureus	Herb		2.00877	0.20412		2.12476	1.24055
Aster ericoides	Herb		2.10791	0.25042		2.19959	1.30103
Aster novaeanglieae	Herb		1.81816	0.382017		2.36082
Astragalus candensis	Herb		1.97469	0.61595		2.43693	1.31806
Coreopsis palmata	Herb		2.18046	0.0681859		1.85297	1.0607
Corylus americanus	Shrub		2.02228	0.303196		2.17085	1.00432
Desmodium canadense	Herb	0.387292	1.80134	0.369216		2.28144	1.20412
Lespedeza capitata	Herb	0.194495	2.00877	0.324282		2.17307	1.18752
Liatris aspera	Herb		2.10791	0.212188		2.08522	1.04532
Lupinus perennis	Herb	-0.0252297	1.81248	0.552668		2.50767	1.31806
Penstemon grandiflorus	Herb		1.97881	0.324282		2.3753	1.20412
Petalostemum purpureum	Herb		2.12494	0.385606		2.43854
Petalostemum villosum	Herb		2.04576	0.421604		2.43569	1.24551
Potentilla arguta	Herb		1.97881	0.276462		2.2307	1.11727
Quercus macrocarpa	Tree		1.97469	0.372912		2.2267	1.24797
Rudbeckia serotina	Herb	0.188061	1.85387	0.330414		2.45576	1.17319
Solidago nemoralis	Herb		2.08619	0.198657		2.14681	1.16435
Solidago rigida	Herb	0.479258	2.0655	0.103804		2.10768	1.11394
Avicennia alba	Tree		2.18243
Avicennia lanata	Tree		2.31695
Bruguiera cylindrica	Tree		2.05799
Ceriops tagal	Tree		2.27572
Lumnitzera littorea	Tree		2.3851
Rhizophora apiculata	Tree		2.30539
Rhizophora mucronata	Tree		2.2815
Scyphiphora hydrophyllacea	Tree		2.19111
Sonneratia alba	Tree		2.20831
Cerbera manghas	Tree		1.8986
Hibiscus tiliaceus	Tree		2.00966
Planchonella obovata	Tree		2.03527
Scaevola taccada	Shrub		1.87648
Tarenna fragrans	Shrub		1.9838
Terminalia catappa	Tree		1.87063
Thespesia populnea	Tree		1.86044
Tristaniopsis whiteana	Tree		2.12726
Adinandra dumosa	Tree		2.23732
Eugenia spicata	Tree		2.02091
Fagraea fragrans	Tree		1.9594
Melastoma malabathricum	Shrub		1.99439
Myrica esculenta	Tree		2.07831
Rhodamnia cinerea	Tree		2.13847
Arthrophyllum diversifolium	Tree		1.92885
Claoxylon indicum	Tree		1.71534
Commersonia bartramia	Tree		1.79534
Ficus fistulosa	Tree		1.97062
Ficus grossularioides	Tree		1.90413
Ixonanthes reticulata	Tree		2.13966
Ixora congesta	Shrub		2.12843
Macaranga heynei	Tree		1.89928
Macaranga hypoleuca	Tree		1.95039
Mallotus paniculatus	Tree		1.7693
Sapium discolor	Tree		1.84802
Trema cannabina	Shrub		1.86107
Trema tomentosa	Tree		1.87582
Vitex pinnata	Tree		1.9987
Adenanthos cygnorum	Shrub	1.60163	2.36654	-0.103474		1.81923	0.639645
Andersonia heterophylla	Shrub	1.03342	2.41255	-0.0268721		1.55348	1.08072
Astroloma xerophyllum	Shrub	0.936514	2.34858	-0.00877392		1.69143	0.855397
Banksia attenuata	Tree	1.47363	2.45381	-0.0899095		1.99627	0.801692
Banksia menziesii	Tree	1.58024	2.509	-0.0958256		1.79554	0.74907
Bossiaea eriocarpa	Shrub	1.21272	2.30452	0.276002		1.96499	0.963357
Calytrix flavescens	Shrub	1.43902	2.3782	0.0111474		1.72205	0.884768
Conostephium pendulum	Shrub	1.43329	2.3349	-0.0400052		1.6999	0.921729
Eremaea pauciflora	Shrub	1.14737	2.29864	0.0633334		1.77522	0.95548
Hibbertia huegelii	Shrub	1.16909	2.26193	0.0425755		1.87368	0.768695
Hibbertia subvaginata	Shrub	1.23452	2.39087	0.120245		1.88597	0.871836
Jacksonia floribunda	Shrub	1.52166	2.49381	0.205475		1.82319	0.924365
Leucopogon conostephioides	Shrub	1.14737	2.19595	0.0441476		1.65203	1.04496
Macrozamia riedlei	Shrub	2.02366	2.46294	0.237795		1.57993	0.520669
Melaleuca acerosa	Shrub	1.39305	2.52185	-0.0705811		1.71052	0.908402
Nuytsia floribunda	Tree	1.45393	2.6621	-0.118615		1.51117	0.688054
Patersonia occidentalis	Herb	1.45939	2.57889	-0.0639892		1.66029	0.69697
Persoonia saccata	Shrub	1.47188	2.66492	-0.14813		1.65319	0.724622
Petrophile linearis	Shrub	1.61951	2.7361	-0.20621		1.61233	0.793729
Regelia ciliata	Shrub	1.27508	2.18837	0.0523091		1.93332	0.979256
Scholtzia involucrata	Shrub	1.37365	2.24919	0.115278		1.89787	1.00437
Stirlingia latifolia	Shrub	1.45939	2.46303	-0.0329203		1.78676	0.855979
Verticordia nitens	Shrub	1.26387	2.52053	0.0503798		1.75996	0.78421
Xanthorrhoea preissii	Shrub	1.38021	2.87149	-0.0979971		1.39498	0.494366
Anigozanthos humilis	Herb	0.597695	1.76096	0.549739		2.55234
Drosera sp	Herb	0.597695	1.69597	0.173478		1.99196
Gladiolus caryophyllaceus	Herb	0.597695	1.94054	0.279211		2.27567
Pterostylis sp	Herb	0.597695	1.57234	0.363424		2.18291
Stylidium sp	Herb	0.597695	2.05052	0.262214		1.97741
Apollonias barbujana	Tree		2.15079	0.104658
Arbutus canariensis	Tree		2.1567	0.0931757
Erica arborea	Tree		2.11915	0.092896
Erica scoparia	Shrub		2.1095	0.139879
Heberdenia bahamensis	Tree		2.05354	-0.0319843
Ilex canariensis	Tree		2.19772	-0.0579919
Ilex platyphylla	Tree		2.14706	0.130334
Laurus azorica	Tree		2.11025	0.0993353
Maytenus canariensis	Shrub		2.07214	0.192006
Myrica faya	Tree		1.97667	0.317436
Ocotea foetens	Tree		2.041	0.321702
Persea indica	Tree		2.07496	0.184691
Picconia excelsa	Tree		2.24217	0.133539
Prunus lusitanica	Tree		2.11244	0.240549
Rhamnus glandulosa	Tree		2.09223	0.218668
Salix canariensis	Tree		1.78089	0.499756
Viburnum rigidum	Shrub		2.15375	0.106701
Visnea mocanera	Tree		2.14333	0.0129936
Adenocarpus foliolosus	Shrub		1.99926	0.589903
Argyranthemum spp.	Shrub		2.14211	0.0537674
Bupleurum salicifolium	Shrub		2.14724	0.334504
Chamaecytisus proliferus	Shrub		2.33439	0.108677
Cistus monspeliensis	Shrub		2.1813	0.485119
Cistus simphytifolius	Shrub		2.2179	0.176936
Daphne gnidium	Shrub		2.202	0.210334
Dorycnium spectabile	Shrub		1.9058	0.563558
Hypericum reflexum	Shrub		2.03973	0.00745716
Jasminum odoratisimum	Shrub		2.18924	0.306393
Juniperus phoenicea	Tree		2.19909	-0.075204
Olea europaea	Tree		2.29314	0.250361
Pinus canariensis	Tree		1.83754	0.095035
Rumex lunaria	Shrub		1.97025	0.331279
Alnus rhombifolia	Tree		1.9861	0.352665
Quercus lobata	Tree		2.11767	0.311224
Quercus keloggii	Tree		2.07089	0.197694
Quercus douglasii	Tree		2.10158	0.235276
Aesculus californica	Tree		1.85643	0.305674
Salix laevigata	Tree		2.0834	0.26529
Heteromeles arbutifolia	Shrub		2.2852	-0.165261
Rhamnus californica	Shrub		1.97146	0.126781
Quercus agrifolia	Tree		2.25469	0.0372272
Arbutus menziesii	Tree		2.15679	0.0838608
Adenostoma fasciculatum	Shrub		2.27653	-0.116055
Arctostaphylos crustacea	Shrub		2.39165	0.0107239
Ceanothus cuneatus	Shrub		2.4434	0.122216
Diplacus aurantiacus	Shrub		2.07918	0.248464
Eriodictyon californicum	Shrub		2.43592	-0.0130045
Lepechinia calycina	Shrub		2.05308	0.467608
Berberis ilicifolia	Tree		2.31269	0.069298
Drimys winteri	Tree		2.16409	-0.0574959
Embothrium coccineum	Tree		2.10704	0.0780942
Maytenus magellanica	Tree		2.13532	0
Nothofagus antarctica	Tree		1.96435	0.383151
Nothofagus betuloides	Tree		2.17731	0.106395
Nothofagus pumilio	Tree		1.73679	0.349666
Artemisia tridentata	Shrub		2.11769	0.203353
Chilopsis linearis	Tree		2.36642	0.188646
Chrysothamnus nauseosus	Shrub		2.0872	0.286456
Flourensia cernua	Shrub		2.06403	0.386738
Larrea tridentata	Shrub		2.08425	0.379278
Simmondsia chinensis	Shrub		2.29394	0.235461
Carya tomentosa	Tree		1.55461	0.214341
Chionanthus virginicus	Tree		1.53832	0.245424
Cornus florida	Tree		1.63518	0.17975
Ilex opaca	Tree		2.13306	0.0488138
Liquidambar styraciflua	Tree		1.854	0.161741
Liriodendron tulipifera	Tree		1.55084	0.205418
Platanus occidentalis	Tree		1.63306	0.302243
Populus heterophylla	Tree		1.84348	0.380698
Acer rubrum	Tree		1.64662	0.298321
Betula papyrifera	Tree		1.92702	0.278732
Populus tremuloides	Tree		1.90995	0.270439
Quercus rubra	Tree		1.91734	0.313295
Salix arctica	Shrub		1.87708	0.698122
Dryas integrifolia	Shrub		2.02617	0.00210556
Cassiope tetragona	Shrub		2.04348	0.243219
Arctostaphylos uva-ursi	Shrub		2.50307	-0.154902
Cistus albidus	Shrub		2.26761	0.0530784
Cistus ladanifer	Shrub		2.45593	0.230449
Cistus libanotis	Shrub		2.43309	0.178977
Cistus monspeliensis	Shrub		2.37851	0.113943
Cistus salvifolius	Shrub		1.97881	0.220108
Halimium commutatum	Shrub		2.46865	-0.0362122
Halimium halimifolium	Shrub		2.21674	0.133539
Halimium umbellatum	Shrub		2.44892	0.103804
Juniperus communis	Tree		2.17653	-0.142668
Juniperus oophora	Tree			-0.0604807
Lavandula stoechas	Shrub		2.20057	0.1959
Olea europaea	Tree		2.29757	0.193125
Phillyrea angustifolia	Tree		2.37059	0.198657
Phlomis purpurea	Shrub			0.40654
Pinus pinaster	Tree			-0.161151
Pistacia lentiscus	Tree		2.33536	0.404834
Quercus coccifera	Shrub		2.21875	0.155336
Quercus rotundifolia	Tree		2.22717	0.247973
Rosmarinus officinalis	Shrub		2.33367	0.0791812
Arbutus unedo	Tree		2.18863	0.00432137
Calluna vulgaris	Shrub		2.14813	-0.207608
Ceratonia siliqua	Tree		2.30016	0.117271
Cistus laurifolius	Shrub		2.47006	0.161368
Cistus populifolius	Shrub		2.31399	0.123852
Crataegus monogyna	Tree		1.97347	0.09691
Erica scoparia	Shrub		2.20908	0.127105
Ficus carica	Tree		2.06073	0.278754
Frangula alnus	Tree		1.85063	0.361728
Fraxinus angustifolia	Tree		1.87419	0.32838
Fraxinus ornus	Tree		2.1945	0.305351
Myrtus communis	Shrub		1.98338	0.176091
Nerium oleander	Shrub		2.25861	0.143015
Populus alba	Tree		1.93096	0.220108
Pyrus bourgeana	Tree		1.92775	0.247973
Quercus faginea	Tree		2.03763	0.225309
Quercus lusitanica	Shrub		2.16986	0.158362
Quercus pyrenaica	Tree		1.88931	0.285557
Quercus suber	Tree		2.15058	0.278754
Rubus ulmifolius	Shrub		1.92409	0.30963
Smilax aspera	Tree		2.02872	0.338456
Anthonotha gracilliflora	Tree			0.33646
Anthonotha macrophylla	Tree			0.401401
Barteria fistulosa	Tree			0.369216
Berlinia auriculata	Tree			0.30103
Cissus producta	Tree			0.30963
Coula edulis	Tree			0.220108
Deidamia clematoides	Tree			0.444045
Dichostemma caloneura	Tree			0.553883
Dichostemma glaucens	Tree			0.346353
Diospyros dendo	Tree			0.139879
Diospyros hoyleana	Tree			0.245513
Garcinia mannii	Tree			0.120574
Garcinia ovalifolia	Tree			0.181844
Leptaulus daphnoides	Tree			0.217484
Librevillea klainei	Tree			0.190332
Lophira alata	Tree			0.240549
Mammea africana	Tree			0.139879
Protomegabaria tapfiana	Tree			0.227887
Rauvolfia vomitoria	Tree			0.416641
Trichoscypha patens	Tree			0.206826
Uapaca staudtii	Tree			0.225309
Bosqueia phoberos	Tree			0.382017
Cassipourea ruwenzoriensis	Tree			0.462398
Celtis africana	Tree			0.39794
Celtis durandii	Tree			0.475671
Chaetachme aristata	Tree			0.463893
Dombeya mukole	Tree			0.536558
Erythrina excelsa	Tree			0.487138
Funtumia latifolia	Tree			0.39794
Markhamia platycalyx	Tree			0.454845
Milletia dura	Tree			0.631444
Pancovia turbinata	Tree			0.352183
Parinari excelsa	Tree			0.269513
Strombosia scheffleri	Tree			0.456366
Teclea nobilis	Tree			0.457882
Piper aequale	Shrub	1.36919	1.56229	0.445189		1.85733
Piper amalago	Shrub	1.43648	1.55991	0.376785		1.86923
Piper auritum	Shrub	0.624626	1.44871	0.574471		2.53782
Piper hispidum	Shrub	1.1348	1.48144	0.451687		2.12057
Piper lapathifolium	Shrub	1.23233	1.49554	0.43637		1.98677
Piper peltatum	Shrub	0.411216	1.36173	0.371068
Piper umbellatum	Shrub	0.548161	1.52114	0.440802		1.94448
Carpinus caroliniana	Tree	0.886491	1.64397	0.361728
Clethra mexicana	Tree	1.055	1.98928	0.146128
Liquidambar styraciflua	Tree	0.857332	1.67572	0
Quercus xalapensis	Tree	0.980003	1.84466	0.255273
Cinnamomum barbeyanum	Tree	1.36361	1.90309	0.20412
Hedyosnium maxicanum	Tree	0.851258	1.66655	0.322219
Magnolia schiedeana	Tree	1.5611	1.9914	0.322219
Oreopanax xalapensis	Tree	1.28103	2.04096	0.278754
Turpinia insignis	Tree	1.17026	1.88606	0.190332
Acacia floribunda	Tree	1.12625	2.09864	0.363003	-1.24413	2.02666	1.02563
Allocasuarina sp	Tree		2.26475	0.120574	-1.33724	1.80443	0.887342
Astrotricha floccosa	Shrub	0.791952	1.91532	0.200793	-1.14874	2.17677	0.948741
Correa reflexa	Shrub	1.06681	1.85138	0.0991548	-1.3279	1.84721	0.664552
Dodonaea triquetra	Shrub	0.906701	1.97619	0.27897	-1.10237	2.32041	0.998091
Eucalyptus paniculata	Tree	1.11847	2.07813	0.0348805	-1.31876	1.87681	0.788196
Eucalyptus umbra	Tree	1.3932	2.31346	-0.0401035	-1.40894	1.60915	0.798116
Gompholobium latifolium	Shrub	1.42216	1.97788	0.233479	-1.50864
Lasiopetalum ferrugineum	Shrub	1.37856	2.08347	0.0636905	-1.52288	1.88483	0.625199
Leptospermum polygalifolium	Shrub	0.866273	1.96265	0.115724	-1.34679	2.04961	1.15243
Lomatia silaifolia	Shrub	1.43607	2.14571	-0.208302	-1.49485	1.67335	0.906495
Macrozamia communis	Shrub		2.43143	0.128813	-1.27572	1.41397	0.601896
Persoonia linearis	Tree	1.60866	2.15501	-0.115715	-1.30103	1.67142	0.579426
Pomaderris ferruginea	Shrub	1.05921	1.99444	0.108326	-1.38722	1.97031	0.75474
Pultenea daphnoides	Shrub	0.972922	1.9738	0.290328	-1.4437	1.97831	0.885866
Pultenea flexilis	Shrub	1.21858	1.95641	0.309472	-1.34679	2.07076	1.15228
Synoum glandulosum	Tree	1.07043	1.96439	0.200523	-1.07572	1.86653	0.964861
[truncated: 375 more rows]

## Sheet: life forms
Species	Life forms	log LL	log LMA	log Nmass	log Pmass	log Amass	log Rdmass
Adenostoma fasciculatum	conifer	1.25527	2.454	0.069	-0.9323	1.691
Arbutus menziesii	broad-leaved	1.17153	2.188	0.094	-0.923	1.861
Arctostaphylos tomentosa	broad-leaved	1.347	2.145	0.014	-0.993527	1.876
Artemisia californica	broad-leaved		1.979
Baccharis pilularis	broad-leaved	0.951338	2.031	0.388	-0.8241	2.208
Ceanothus cuneatus	broad-leaved	1.16691	2.356	0.255	-0.9617	2.002
Ceanothus oliganthus	broad-leaved	1.03663	2.081	0.328	-0.826	2.173
Cercocarpus betuloides	broad-leaved	1.06868	2.138	0.382	-0.6916	2.249
Clematis lasiantha	broad-leaved		1.874
Dirca occidentalis	broad-leaved	0.597939	1.754	0.412	-0.7608	2.13
Eriodictyon californicum	broad-leaved	0.957687	2.251	0.222	-0.8045	2.017
Heteromeles arbutifolia	broad-leaved	1.35817	2.315	0.137	-0.8794	1.774
Holodiscus discolor	broad-leaved	0.661392	1.894	0.288	-0.7202	2.207
Lepechinia calycina	broad-leaved	0.64453	2	0.259	-0.9224	2.098
Lonicera hispidula	broad-leaved		2.032
Lotus scoparius	broad-leaved	0.301319	1.984	0.361	-0.8034	2.35
Mimulus aurantiacus	broad-leaved	0.876417	2.049	0.063	-0.9212	2.089
Pickeringia montana	broad-leaved		2.181
Prunus iIlicifolia	broad-leaved	1.21678	2.178	0.311	-0.8474	1.805
Quercus agrifolia	broad-leaved		2.292
Quercus durata	broad-leaved		2.322
Rhamnus californica	broad-leaved	1.18593	1.869	0.318	-0.689	2.163
Rhamnus crocea	broad-leaved	1.13349	2.1	0.328	-0.871	1.995
Ribes californicum	broad-leaved	0.516557	1.967	0.349	-0.8753	2.072
Ribes malvaceum	broad-leaved		1.874
Sambucus mexicana	broad-leaved	0.624545	1.999	0.404	-0.7476	2.28
Solanum umbelliferum	broad-leaved		1.903
Toxicodendron diversiloba	broad-leaved	0.615523	1.901	0.296226	-0.702421	2.218
Dodonaea viscosa	broad-leaved		2.16134	0.146128	-0.853872
Heteropogon contortus	broad-leaved		1.65529	0.071882	-0.958607
Betula papyrifera	broad-leaved		1.99564	0.402313		2.29003
Prunus serotina	broad-leaved		1.74819	0.427908		2.51851
Fraxinus americana	broad-leaved		1.96377	0.358449		2
Quercus rubra	broad-leaved		2.04139	0.405773		2.33041
Quercus alba	broad-leaved		2.00436	0.527114		2.35793
Castanea dentata	broad-leaved		1.76344	0.412662		2.33646
Ulmus americana	broad-leaved		1.8129	0.301052		2.29667
Acer rubrum	broad-leaved		2.02118	0.234087		2.08991
Acer saccharum	broad-leaved		2.0086	0.221857		1.83251
Acer pensylvanicum	broad-leaved		1.77086	0.405244		2.22531
Bursera simaruba	broad-leaved		1.92905	0.179552	-0.997402
Piper amalago	broad-leaved		1.81664	0.327359	-0.852169
Piper auritum	broad-leaved		1.57231	0.507991	-0.66374
Piper hispidum	broad-leaved		1.81113	0.362294	-0.754734
Urera caracasana	broad-leaved		1.75509	0.452247	-0.678091
Quercus falcata	broad-leaved	0.915066	2.12385	0.167317		2.08276
Quercus hemispherica	broad-leaved	0.961171	2.13415	0.0827854		1.97376
Quercus incana	broad-leaved	0.752655	2.03291	-0.0222764		2.13879
Quercus laurifolia	broad-leaved	0.880738	2.10257	0.120574		2.0234
Quercus laevis	broad-leaved	0.933767	2.03678	0.184691		2.0971
Quercus myrtifolia	broad-leaved	1.09116	2.10461	0.00860017		1.74328
Quercus nigra	broad-leaved	0.935428	2.11014	0.11059		2.06158
Quercus shumardii	broad-leaved	0.918527	1.99415	0.225309		2.18483
Quercus pumila	broad-leaved	0.837273	2.08113	0.00432137		2.04202
Quercus stellata	broad-leaved	0.897338	2.15193	0.238046		2.08776
Quercus margaretta	broad-leaved	0.878854	2.04499	0.20412		2.18392
Quercus michauxii	broad-leaved	0.915066	2.20738	-0.05061		2.08106
Quercus austrina	broad-leaved	0.911578	2.05956	0.287802		2.13341
Quercus chapmanii	broad-leaved	0.943638	2.06091	0.143015		1.87804
Quercus geminata	broad-leaved	1.04347	2.35493	-0.0604807		1.94732
Quercus minima	broad-leaved	0.83519	2.01115	0.25042		2.10047
Quercus virginiana	broad-leaved	1.00989	2.17091	0.120574		2.20236
Arbutus andrachne	broad-leaved	1.10037	1.65758
Arbutus unedo	broad-leaved	1.17898	1.65365
Quercus coccifera	broad-leaved	1.13988	1.66555
Pistacia lentiscus	broad-leaved	1.05308	1.65561
Ceratonia siliqua	broad-leaved	1.37291	1.6925
Myrtus communis	broad-leaved	1.35218	1.86012
Olea europaea	broad-leaved	1.36922	1.64016
Phillyrea media	broad-leaved		1.767
Quercus ilex	broad-leaved		1.90309
Laurus nobilis	broad-leaved		1.91009
Nerium oleander	broad-leaved		1.69037
Dacrydium beccarii	broad-leaved			-0.05061	-1.24413
Eugenia caudata	broad-leaved			-0.187087	-1.3279
Eugenia stapfiana	broad-leaved			-0.0655015	-1.09151
Eurycoma longifolia	broad-leaved				-0.89279
Ficus deltoidea	broad-leaved			0.120574	-1.74473
Podocarpus neriifolius	broad-leaved			-0.161151	-1.26761
Luehea seemannii	broad-leaved	0.690196		0.418301
Acer platanoides	broad-leaved		1.75716	0.371683	-0.784274
Acer pseudoplatanus	broad-leaved		1.87583	0.4537	-0.752231
Arbutus unedo	broad-leaved		1.9652	0.362357	-0.717453
Buxus sempervirens	broad-leaved		2.04423	0.320492	-0.997114
Crataegus monogyna	broad-leaved		1.93854	0.253055	-0.895769
Dryas octopetala	broad-leaved		1.80989	0.284807	-0.379864
Empetrum nigrum	broad-leaved		1.99546	0.123307	-0.968592
Fagus sylvatica	broad-leaved		1.91045	0.377792	-0.865133
Helianthemum nummularium	broad-leaved		1.88125	0.35336	-0.65083
Larix decidua	conifer		2.03795	0.352825	-0.765314
Picea sitchensis	conifer		2.18779	0.115611	-0.917215
Pinus sylvestris	conifer		2.14615	0.223582	-0.709965
Prunus spinosa	broad-leaved		1.84204	0.48192	-0.672301
Quercus ilex	broad-leaved		2.20401	0.370143	-0.747147
Quercus rubra	broad-leaved		1.75861	0.354749	-0.816256
Rhamnus cathartica	broad-leaved		1.7379	0.480247	-0.758205
Ribes uva-crispa	broad-leaved		1.78304	0.349844	-0.737945
Robinia pseudoacacia	broad-leaved		1.69618	0.472756	-0.810603
Sorbus aucuparia	broad-leaved		1.8566	0.402548	-0.736167
Vaccinium myrtillus	broad-leaved		1.73928	0.232573	-1.00877
Vaccinium vitis-idaea	broad-leaved		2.14415	0.0501863	-1.01547
Viburnum tinus	broad-leaved		2.07004	0.0743287	-0.950782
Amelanchier alnifolia	broad-leaved		2.02826	0.260071	-0.802341	2.18865
Artemisia tridentata	broad-leaved		2.22915	0.156246	-0.587893	1.64836
Juniperus osteosperma	conifer		2.81248	-0.121478	-0.957609	0.681241
Pinus jeffreyi	conifer		2.51985	0.0326188	-0.968729	1.50515
Pinus monophylla	conifer		2.8729	-0.047692	-0.926995	0.954243
Pinus ponderosa	conifer		2.49826	-0.0150229	-1.01282	1.35507
Purshia tridentata	broad-leaved			0.374015	-0.771866
Lyonia lucida	broad-leaved	1.25527	2.23603	-0.154902	-1.46374	1.68305
Cyrilla racemiflora	broad-leaved	1.25527	2.01284	0.100371	-1.25864	2.03463
Leucothoe racemosa	broad-leaved	0.812913	1.94841	-0.00877392	-1.31873	1.90363
Itea virginica	broad-leaved	0.812913	1.85248	0.049218	-1.17662	1.95665
Clethra alnifolia	broad-leaved	0.812913	1.93197	0.100371	-1.1706	2.10755
Achillea erba	broad-leaved	0.361986	1.65322	0.664642		2.56067
Arabis alpina	broad-leaved		1.57978	0.468347
Arabis caerulea	broad-leaved		1.67761	0.50515
Artemisia genipi	broad-leaved		1.62325	0.474216
Campanula barbata	broad-leaved		1.72099	0.356026
Cerastium uniflorum	broad-leaved		1.49958	0.417472
Doronicum clusii	broad-leaved	0.249282	1.68842	0.606381		2.63639
Erigeron uniflorus	broad-leaved	0.408983	1.67942	0.519171		2.67366
Gentiana bavarica	broad-leaved		1.76938	0.209515
Gentiana kochiana	broad-leaved		1.82347	0.133539
Geum montanum	broad-leaved	0.323068	1.84907	0.392697		2.32883
Geum reptans	broad-leaved	0.47593	1.85062	0.4133		2.28904
Leontodon hispidus	broad-leaved		1.69897	0.501059
Leucanthemopsis alpina	broad-leaved	0.419978	1.79588	0.372912		2.24565
Ligusticum mutellina	broad-leaved	0.403379	1.89984	0.558709		2.47886
Linaria alpina	broad-leaved		1.60206	0.376577
Luzula alpino-pilosa	broad-leaved	0.280316	1.83251	0.474216		2.33442
Oxyria digyna	broad-leaved	0.19813	1.40653	0.658011		2.80967
Pedicularis asplenifolius	broad-leaved	0.302218	1.7221	0.449478		2.49621
Poa laxa	broad-leaved		1.60206	0.635484
Polygonum viviparum	broad-leaved	0.129672	1.84621	0.592732		2.46725
Potentilla aurea	broad-leaved		1.67761	0.390935
Potentilla crantzii	broad-leaved	0.380211	1.78246	0.515874		2.4318
Potentilla frigida	broad-leaved		1.72428	0.39794
Primula glutinosa	broad-leaved	0.397702	1.86169	0.428135		2.2204
Ranunculus glacialis	broad-leaved	0.491362	1.78906	0.528595		2.47886
Senecio incanus	broad-leaved		1.82347	0.30963
Sibbaldia procumbens	broad-leaved		1.76938	0.271842
Taraxacum alpinum	broad-leaved	0.336432	1.5623	0.468347		2.46344
Veronica alpestris	broad-leaved		1.5682	0.363612
Veronica bellidioides	broad-leaved		2	0.075547
Achillea millefolium	broad-leaved	0.140138	1.71927	0.503791		2.5391
Alchemilla verticillata	broad-leaved		1.43136	0.462398
Arabis hirsuta	broad-leaved		1.69897	0.30103
Caltha palustris	broad-leaved	0.408983	1.51055
Campanula glomerata	broad-leaved		1.5682	0.431364
Carum carvi	broad-leaved	0.302218	1.57864	0.544068		2.70115
Cerastium arvense	broad-leaved		2	0.544068
Chrysanthemum leucanthemum	broad-leaved	0.336432	1.71842	0.452553		2.64589
Erigeron acre	broad-leaved		1.74819	0.322219
Geum rivale	broad-leaved	0.456408	1.72263	0.385606		2.37572
Leontodon hispidus	broad-leaved		1.63849	0.30103
Lychnis flos-jovis	broad-leaved		1.65321	0.146128
Polygonum bistorta	broad-leaved		1.5682	0.378398
Potentilla anserina	broad-leaved	0.272763	1.71851	0.489958		2.5867
Potentilla reptans	broad-leaved		1.53782	0.544068
Potentilla verna	broad-leaved		1.77085	0.342423
Primula elatior	broad-leaved	0.490016	1.62479	0.390935		2.4023
Primula farinosa	broad-leaved		1.65321	0.230449
Ranunculus acris	broad-leaved	0.257251	1.80382	0.373831		2.39147
Ranunculus bulbosus	broad-leaved		1.74819	0.463893
Ranunculus ficaria	broad-leaved		1.50515	0.518514
Ranunculus nemorosus	broad-leaved		1.82607	0.30103
Taraxacum officinale	broad-leaved	0.336432	1.53655	0.556303		2.82102
Trifolium repens	broad-leaved	0.302218	1.53019	0.653213		2.68194
Veronica chamaedrys	broad-leaved		1.50515	0.230449
Plantago lanceolata	broad-leaved		1.77085	0.363612
Taraxacum officinale	broad-leaved		1.51851	0.60206
Trifolium repens	broad-leaved		1.60206	0.536558
Calamagrostis intermedia	broad-leaved		2.29885	-0.173925
Bromus lanatus	broad-leaved		1.9345	0.419956
Arbutus menziesii	broad-leaved		2.08991	0.128709		1.80277
Heteromeles arbutifolia	broad-leaved		2.36361	0.0156699		1.6561
Prunus ilicifolia	broad-leaved		2.19866	0.250242		1.734
Rhamnus californica	broad-leaved		2.02531	0.279977		1.85552
Umbellularia californica	broad-leaved		2.11727	0.246809		1.79588
Acer monspessulanum	broad-leaved		1.92445	0.347835
Aegilops geniculata	broad-leaved		1.56864	0.513794
Avena barbata	broad-leaved		1.61083	0.382157
Avenula bromoides	broad-leaved		1.73518	0.305351
Brachypodium distachyon	broad-leaved		1.48413	0.235528
Brachypodium phoenicoides	broad-leaved		1.8041	0.209515
Brachypodium retusum	broad-leaved		1.74352	0.281033
Bromus erectus	broad-leaved		1.73993	0.328088
Bromus lanceolatus	broad-leaved		1.58922	0.273851
Bromus madritiensis	broad-leaved		1.4318	0.324282
Bupleurum rigidum	broad-leaved		2.02687	0.137664
Buxus sempervirens	broad-leaved		2.21467	0.060252
Calamintha nepeta	broad-leaved		1.57512	0.504373
Clematis vitalba	broad-leaved		1.56067	0.508166
Convolvulus arvensis	broad-leaved		1.64397	0.458192
Crepis sancta	broad-leaved		1.58004	0.276772
Crepis vesicaria	broad-leaved		1.74473	0.440904
Dactylis glomerata	broad-leaved		1.64846	0.440819
Daucus carota	broad-leaved		1.88941	0.440904
Desmazeria rigida	broad-leaved		1.63264	0.40654
Dichanthium ischaemum	broad-leaved		1.5376	0.305351
Kickxia spuria	broad-leaved		1.46218	0.342338
Medicago minima	broad-leaved		1.48017	0.684257
Melica ciliata	broad-leaved		1.63451	0.432167
Phillyrea latifolia	broad-leaved		2.12494	0.060252
Phleum pratense	broad-leaved		1.56703	0.426511
Pistacia terebinthus	broad-leaved		1.96658	0.333959
Plantago lanceloata	broad-leaved		1.80134	0.253648
Psoralea bituminosa	broad-leaved		1.71897	0.63216
Quercus ilex	broad-leaved		2.17393	0.21832
Quercus pubescens	broad-leaved		2.00436	0.229224
Rubia peregrina	broad-leaved		1.84771	0.15076
Rubus sp	broad-leaved		1.76955	0.391951
Sanguisorba minor	broad-leaved		1.75203	0.361282
Scabiosa atropurpurea	broad-leaved		1.92082	0.443103
Urospermum dalechampii	broad-leaved		1.49621	0.508166
Viburnum tinus	broad-leaved		1.96257	0.100681
Acer monspessulanum	broad-leaved	0.757438	1.84466	0.328282		2.16223
Aristolochia rotunda	broad-leaved		1.55909	0.515654
Brachypodium phoenicoides	broad-leaved	0.70722	1.74473	0.325415		2.39212
Calamintha nepeta	broad-leaved		1.53611	0.431995
Crataegus monogyna	broad-leaved	0.684206	1.85078	0.276772		2.23231
Dactylis glomerata	broad-leaved		1.55129	0.535604
Dorycnium pentaphyllum	broad-leaved	0.747337	1.73755	0.533828		2.25158
Helianthemum nummularium	broad-leaved		1.82391	0.408889
Lavandula latifolia	broad-leaved		1.91364	0.289453
Pistacia terebinthus	broad-leaved		1.84466	0.394411
Plantago lanceloata	broad-leaved	0.650427	1.70115	0.379434		2.52567
Psoralea bituminosa	broad-leaved		1.71444	0.644749
Quercus pubescens	broad-leaved		1.97469	0.325415
Rubia peregrina	broad-leaved	0.675251	1.78781	0.289453		2.31425
Rubus sp	broad-leaved	0.824384	1.72816	0.363922		2.23605
Scabiosa atropurpurea	broad-leaved		1.86967	0.472774
Teuchrium chamaedrys	broad-leaved	0.853348	1.84466	0.325415		2.31844
Viburnum tinus	broad-leaved	1.08391	1.78781	0.183865		1.8814
Acer monspessulanum	broad-leaved		1.89963	0.253648
Aegilops geniculata	broad-leaved	0.323068	1.64397	0.399482		2.52503
Anagallis arvensis	broad-leaved		1.39794	0.460305
Aristolochia rotunda	broad-leaved		1.68825	0.542637
Avena barbata	broad-leaved		1.59517	0.394411
Avenula bromoides	broad-leaved	0.408983	1.79615	0.239945		1.83445
Brachypodium distachyon	broad-leaved	0.336432	1.52578	0.383986		2.40243
Brachypodium phoenicoides	broad-leaved	0.569967	1.81382	0.229646		2.01469
Bromus erectus	broad-leaved	0.446307	1.73166	0.299798		2.21355
Bromus hordeaceus	broad-leaved		1.54975	0.426511
Bromus lanceolatus	broad-leaved	0.329802	1.61208	0.342385		2.3665
Bromus madritiensis	broad-leaved		1.44612	0.33646
Bupleurum rigidum	broad-leaved	0.624098	1.90658	0.210206		2.41466
Buxus sempervirens	broad-leaved	1.20531	2.21467	0.163912		1.51741
Calamintha nepeta	broad-leaved	0.542194	1.57823	0.419421		2.37924
Carex hallerana	broad-leaved	0.624098	1.86012	0.269902		2.16285
Catananche coerulea	broad-leaved	0.471131	1.79588	0.307651		2.5722
Clematis vitalba	broad-leaved		1.70553	0.438694
Convolvulus arvensis	broad-leaved		1.58004	0.460305
Crataegus monogyna	broad-leaved		1.97881	0.203343
Crepis sancta	broad-leaved		1.48945	0.263709
Crepis vesicaria	broad-leaved		1.58838	0.328282
Dactylis glomerata	broad-leaved	0.29504	1.65956	0.48045		2.11152
Daucus carota	broad-leaved	0.435966	1.75056	0.40239		2.44053
Dorycnium hirsutum	broad-leaved	0.516888	1.67613	0.504068		2.44791
Dorycnium pentaphyllum	broad-leaved		1.83863	0.425192
Echinops ritro	broad-leaved	0.50366	1.92812	0.429746		2.33036
Eryngium campestre	broad-leaved	0.39195	1.98716	0.334206		2.35119
Helianthemum nummularium	broad-leaved	0.419978	1.8066	0.354828		2.16432
Hordeum murinum	broad-leaved		1.53165	0.4843
Juniperus oxycedrus	broad-leaved	1.25883	2.14874	-0.0755656		1.40121
Kickxia spuria	broad-leaved		1.46597	0.322529
Lavandula latifolia	broad-leaved	0.620692	1.9692	0.234892		1.66179
Lolium rigidum	broad-leaved		1.59688	0.394452
Lonicera etrusca	broad-leaved		1.82102	0.260381
Lotus corniculatus	broad-leaved		1.68403	0.486882
Medicago minima	broad-leaved	0.361986	1.66354	0.573844		2.39073
Phillyrea latifolia	broad-leaved		2.04096	0.257028
Phleum pratense	broad-leaved	0.30928	1.61261	0.391443		2.14943
Pistacia terebinthus	broad-leaved	0.754934	1.99012	0.325256		2.08453
Plantago lanceloata	broad-leaved		1.77728	0.307806
Potentilla crantzii	broad-leaved	0.58877	1.91009	0.257353		2.37199
Prunus mahaleb	broad-leaved	0.63416	1.88739	0.343756		2.24887
Prunus spinosa	broad-leaved	0.721008	1.90658	0.279366		2.19661
Psoralea bituminosa	broad-leaved		1.70333	0.623559
Quercus ilex	broad-leaved	1.35699	2.22621	0.114077		1.7312
Quercus pubescens	broad-leaved	0.830756	2.03598	0.304213		1.86493
Rosa micrantha	broad-leaved	0.525489	1.89279	0.279366		2.21937
Rubia peregrina	broad-leaved		1.73049	0.313755
Rubus sp	broad-leaved		1.91009	0.27029
Ruscus aculeatus	broad-leaved		1.74232	0.429739
Sanguisorba minor	broad-leaved	0.485371	1.7122	0.322374		2.31959
Scabiosa atropurpurea	broad-leaved		1.92082	0.394411
Stachys officinalis	broad-leaved		1.78252	0.3167
Teuchrium chamaedrys	broad-leaved	0.715545	1.88606	0.29879		1.72628
Thymus vulgaris	broad-leaved	0.769741	1.89739	0.295699		1.92288
Trifolium angustifolium	broad-leaved		1.66354	0.511926
Urospermum dalechampii	broad-leaved		1.61798	0.319624
Viburnum tinus	broad-leaved		1.92445	0.0385327
Viola scotophylla	broad-leaved	0.566106	1.67572	0.292411		2.25693
Xeranthemum inapertum	broad-leaved	0.265076	1.44916	0.498319		2.56717
Cistus monspeliensis	broad-leaved		2.1267	0.320146		2.27016
Cneorum tricoccon	broad-leaved		2.00466	0.303196		2.02996
Hypericum balearicum	broad-leaved		2.06854	0.389166		1.99608
Phillyrea latifolia	broad-leaved		2.08369	0.25042		2.02631
Pinus halepensis	conifer		2.09795	0.113943		1.78343
Pistacia lentiscus	broad-leaved		2.31843	0.149219		1.79736
Rhamnus ludovici-salvatoris	broad-leaved		2.21921	0.260071		1.7694
Urginea maritima	broad-leaved		2.04235	0.49276		2.04653
Arbutus unedo	broad-leaved		2.2152	0.075547		1.74213
Cistus albidus	broad-leaved		2.04007	0.287802		2.20205
Cistus salvifolius	broad-leaved		2.13243	0.267172		2.16049
Quercus coccifera	broad-leaved		2.22794	0.0791812		1.77358
Quercus Ilex	broad-leaved		2.28988	0.1959		1.7761
Rhamnus alaternus	broad-leaved		2.17931	0.305351		1.82897
Acer opalus	broad-leaved		1.75251	0.514548		2.12683
Avenula crassifolia	broad-leaved		1.96417	0.346353		2.16446
Capparis spinosa	broad-leaved		1.8898	0.673942		2.55641
Cephalaria squamiflora	broad-leaved		2.05773	0.359835		2.24437
Crepis triasii	broad-leaved		1.72787	0.519828		2.4545
Delphinium pictium	broad-leaved		1.7545	0.592177		2.51083
Dianthus rupicola	broad-leaved		2.0586	0.307496		2.15219
Euphorbia margalidiana	broad-leaved		1.90482	0.564666		2.21754
Globularia cambessedesii	broad-leaved		2.19571	0.212188		2.03098
Ligusticum huteri	broad-leaved		1.60358	0.618048		2.58783
Limonium migjornense	broad-leaved		2.03195	0.392697		2.19075
Phlomis italica	broad-leaved		2.04178	0.320146		2.26036
Pistacia terebinthus	broad-leaved		2.13008	0.450249		2.18968
Pteridium aquilinum	broad-leaved		2.03499	0.332438		2.0615
Silene mollisima	broad-leaved		1.83569	0.563481		2.33261
Urtica atrovirens	broad-leaved		1.64464	0.609594		2.54847
Viola jaubertiana	broad-leaved		1.72206	0.562293		2.33761
Viola stolonifera	broad-leaved		1.58883	0.622214		2.51034
Viola x balearica	broad-leaved		1.80298	0.429752		2.26663
Amaranthus blitoides	broad-leaved		1.74135	0.635484		2.79337
Amaranthus retroflexus	broad-leaved		1.7705	0.40654		2.53265
Anagyris foetida	broad-leaved		1.97944	0.570543		2.36394
Atriplex halimus	broad-leaved		1.94188	0.716003		2.41218
Beta vulgaris	broad-leaved		1.71314	0.580925		2.6519
Ceratonia siliqua	broad-leaved		2.40203	0.155336		1.7193
Chenopodium album	broad-leaved		1.83119	0.623249		2.59874
Cichorium intybus	broad-leaved		1.54425	0.550228		2.73986
Convolvulus arvensis	broad-leaved		1.6214	0.737987		2.62931
Datura stramonium	broad-leaved		1.68488	0.757396		2.7757
Dittrichia viscosa	broad-leaved		1.73105	0.531479		2.50318
Fraxinus angustifolia	broad-leaved		2.0532	0.374748		2.30722
Helleborus lividus	broad-leaved		2.23251	0.227887		1.88272
Helleborus foetidus	broad-leaved		2.22616	0.220108		1.83867
Lavandula dentata	broad-leaved		1.90006	0.390935		2.47394
Lavatera cretica	broad-leaved		1.6794	0.702431		2.80353
Paeonia cambessedesii	broad-leaved		2.06028	0.240549		2.02429
Populus alba	broad-leaved		1.96381	0.371068		2.2786
Quercus humilis	broad-leaved		2.02267	0.436163		2.20347
Verbascum sinuatum	broad-leaved		1.86453	0.318063		2.53121
Vitex agnus-castus	broad-leaved		1.92047	0.523746		2.44478
Castanopsis sieboldii	broad-leaved	1.15196	2.08448	0.00160039		1.6464
Quercus acuta	broad-leaved	1.16035	2.04558	-0.100361		1.6698
Camellia japonica	broad-leaved	1.09109	2.00526	0.00592776		1.86178
Cleyera japonica	broad-leaved	0.894404	2.02493	0.0598479		1.8393
Cinnamomum japonicum	broad-leaved	1.37661	2.04997	-0.0104091		1.60548
Neolitsea sericea	broad-leaved	1.20133	1.97954	0.0212604		1.61782
Illicium anisatum	broad-leaved	1.22267	1.76338	0.0980375		1.82453
Maesa japonica	broad-leaved	1.15783	1.9094	0.0428644		1.78135
Boehmeria sp	broad-leaved		1.74275	0.39838		2.00862
Syzygium sp1	broad-leaved		1.8219	0.170256		1.7236
Macaranga triloba	broad-leaved		1.54185	0.514726		2.34139
Parashorea malaanonan	broad-leaved		1.68554	0.279696		1.9406
Shorea argentifolia	broad-leaved		1.66563	0.32442		2.027
Drimys piperita	broad-leaved		1.82304	0.180094		1.86914
Syzygium confertum	broad-leaved		2.05853	0.132402		1.67209
Macaranga sp	broad-leaved		1.81974	0.171177		1.89256
Trigonobalanus verticillatus	broad-leaved		1.98573	0.184205		1.7402
Tristaniopsis clementis	broad-leaved		2.10263	0.052831		1.77221
Drimys piperita	broad-leaved		2.06936	0.253431		1.50555
Syzygium houttuynii	broad-leaved		2.25616	0.100785		1.29439
Lithocarpus havilandii	broad-leaved		2.32268	0.0854665		1.23644
Photinia davidiana	broad-leaved		2.16636	0.347035		1.6562
Schima brevifolia	broad-leaved		2.20386	0.0867273		1.43391
Drimys piperita	broad-leaved		2.07425	0.345775		1.39049
Syzygium sp2	broad-leaved		2.26102	0.245858		1.20465
Photinia davidiana	broad-leaved		2.1103	0.3363		1.50012
Acer saccharum	broad-leaved		1.81417	0.206826	-0.958607
Carya glabra	broad-leaved		1.8729	0.220108	-0.920819
Fagus grandifolia	broad-leaved		1.83003	0.294466	-0.920819
Liriodendron tulipifera	broad-leaved		1.88439	0.235528	-0.920819
Quercus alba	broad-leaved		1.89585	0.252853	-0.721246
Quercus prinus	broad-leaved		1.94006	0.176091	-0.886057
Quercus rubra	broad-leaved		1.97265	0.209515	-0.920819
Quercus velutina	broad-leaved		2.02182	0.139879	-0.920819
Acer rubrum	broad-leaved		1.85733			2.06112
Acer saccharum	broad-leaved		1.77085			1.93321
Fagus grandfolia	broad-leaved		1.79239			2.01865
Populus grandidentata	broad-leaved		1.89209			2.28642
Quercus rubra	broad-leaved		2.04139			2.05517
Anacardium excelsum	broad-leaved	0.9268	1.92	0.220108		2.09639	1.41366
Luehea seemannii	broad-leaved	0.8024	2.14	0.307496		2.13172	1.32993
Castilla elastica	broad-leaved	0.7649	1.89	0.32838		2.00335	1.43348
Antirrhoea trichantha	broad-leaved	0.7599	1.97	0.31597		2.31707	1.26197
Urera caracasana	broad-leaved	0.4759	1.83	0.583199		2.36491	1.46013
Cecropia longipes	broad-leaved	0.4564	2.06	0.416641		2.23702	1.33611
Acer palmatum	broad-leaved		1.65321			1.96658
Acer mono	broad-leaved	0.649335	1.75205	0.20412		1.90553
Carpinus cordata	broad-leaved		1.79796			1.93678
Cornus contraversa	broad-leaved	0.634477	1.79796			1.97077
Ostrya japonica	broad-leaved	0.672098	1.81291			2.00852
Populus sieboldii	broad-leaved	0.546543	1.83251			2.17725
Prunus ssiori	broad-leaved		1.86034			1.87943
Maackia amurensis	broad-leaved	0.62634	1.88081			1.94882
Juglans ailanthifolia	broad-leaved	0.565848	1.90037	0.491362		1.95678
Cercidiphyllum japonicum	broad-leaved	0.641474	1.85733			2.00737
Sorbus commixta	broad-leaved	0.713491	1.86629			2.00214
Fraxinus madshurica	broad-leaved	0.572872	1.85733	0.380211		2.02209
Kalopanax pictus	broad-leaved		1.87506			2.01332
Tilia japonica	broad-leaved		1.86923	0.380211		2.03138
Betula maximowicziana	broad-leaved		1.86332			2.06726
Betula platyphylla	broad-leaved		1.86332	0.531479		2.11877
Alnus hirsuta	broad-leaved	0.517196	1.89487	0.50515		2.15823
Tilia maximowicziana	broad-leaved		1.91116			1.94024
Ulmus davidiana	broad-leaved		1.91908	0.50515		1.94562
Prunus sargentii	broad-leaved		1.9345			1.96612
Sorbus alnifolia	broad-leaved		1.92942			1.97804
Magnolia obovata	broad-leaved	0.618048	1.90849			2.03477
Alnus japonica	broad-leaved		1.90849			2.10127
Betula ermanii	broad-leaved	0.649335	1.91381			2.1465
Fagus crenata	broad-leaved	0.725912	1.98			1.75726
Quercus mongolica	broad-leaved	0.719331	1.95904			1.87463
Ulmus laciniata	broad-leaved	0.546543	1.98227			1.92178
Betula davurica	broad-leaved		1.98453			1.97709
Salix hultenii	broad-leaved		2.01284			1.84811
Populus maximowiczii	broad-leaved	0.556303	2.01072			2.09702
Achillea millefolium	broad-leaved		1.69332	0.358955
Alnus incana	broad-leaved		1.858	0.5075
Andromeda polifolia	broad-leaved	1.16817	2.11089	0.191269
Angelica sylvestris	broad-leaved		1.47629	0.473411
Anthriscus sylvestris	broad-leaved		1.3706	0.374707
Arctostaphylos alpina	broad-leaved	0.471131	1.93005	0.158434
Astragalus alpinus	broad-leaved		1.61414	0.59364
Astragalus frigidus	broad-leaved		1.6693	0.703757
Bartsia alpina	broad-leaved		1.85603	0.420113
Betula nana	broad-leaved	0.478309	1.90542	0.350165
Betula pubescens	broad-leaved		1.8385	0.440723		2.07918
Calamagrostis lapponica	broad-leaved		1.58988	0.244967
Caltha palustris	broad-leaved		1.38021	0.553461
Carex capitata	broad-leaved		1.87559	0.232303
Carex rostrata	broad-leaved		1.83862	0.382859
Carex vaginata	broad-leaved		1.79375	0.286156
Cassiope tetragona	broad-leaved	1.51776		-0.0705811
Chamerion angustifolium	broad-leaved		1.82087	0.469869
Cornus suecica	broad-leaved		1.50946	0.31503
Deschampsia cespitosa	broad-leaved		1.7439	0.270488
Diphasiastrum complanatum	broad-leaved			-0.0947169
Drosera rotundifolia	broad-leaved		1.40097	0.0792708		1.65896
Dryas octopetala	broad-leaved	0.441168	1.96942	0.306221
Elytrigia repens	broad-leaved		1.61742	0.388039
Empetrum hermaphroditum	broad-leaved	1.61031	2.24797	-0.107905
Empetrum nigrum	broad-leaved	1.60996	1.94122	0.0780164		1.60206
Equisetum sylvaticum	broad-leaved		1.61251	0.362518
Eriophorum angustifolium	broad-leaved		1.88356	0.409388
Euphrasia frigida	broad-leaved		1.48651	0.730386
Filipendula ulmaria	broad-leaved		1.54758	0.443789
Geranium sylvaticum	broad-leaved		1.66384	0.434792
Gymnocarpium dryopteris	broad-leaved		1.44996	0.216641
Juncus arcticus	broad-leaved		2.3557	0.349002
Juniperus communis	conifer		2.22209	0.0590216
Lathyrus pratensis	broad-leaved		1.5308	0.686813
Lycopodium annotinum	broad-leaved			-0.0664874
Matteuccia struthiopteris	broad-leaved		1.56605	0.517197
Melampyrum sylvaticum	broad-leaved		1.49779	0.269643
Orthilia secunda	broad-leaved		1.74547	0.273482
Pedicularis lapponica	broad-leaved	0.316229	1.78879	0.487689
Pedicularis sceptrum-carolinum	broad-leaved		1.80754	0.268677
Picea abies x obovata	conifer		2.47845	0.121898
Pinguicula vulgaris	broad-leaved		1.21605	0.200317		1.78533
Pinus sylvestris	conifer		2.4792	-0.0251104
Polygonum viviparum	broad-leaved	0.265076	1.84436	0.499595
Populus tremula	broad-leaved		1.8862	0.398789
Rhinanthus minor	broad-leaved		1.8171	0.550003
Rhodiola rosea	broad-leaved		1.53215	0.494424
Rhododendron lapponicum	broad-leaved	1.14065	2.12829	0.221642
Ribes spicatum	broad-leaved		1.52334	0.468833
Rubus chamaemorus	broad-leaved		1.90863	0.274862
Rubus saxatilis	broad-leaved		1.48251	0.359035
Rumex obtusififolius	broad-leaved		1.6044	0.522745
Salix lapponum	broad-leaved		1.93323	0.389405
Salix myrsinites	broad-leaved	0.473537	2.06589	0.236358
Salix reticulata	broad-leaved	0.508114	2.09822	0.227961
Solidago virgaurea	broad-leaved		1.56016	0.457034
Sorbus aucuparia	broad-leaved		1.79755	0.287006
Tanacetum vulgare	broad-leaved		1.68892	0.423399
Trifolium pratense	broad-leaved		1.40709	0.673672
Vaccinium myrtillus	broad-leaved	0.471131	1.73113	0.277858		2.01284
Vaccinium uliginosum	broad-leaved	0.471131	1.89139	0.297829		2.01284
Vaccinium vitis-idaea	broad-leaved	1.44477	2.20272	-0.0159884		1.60206
Viccia cracca	broad-leaved		1.44405	0.735002
Arctostaphylos alpina	broad-leaved	0.38612	1.98227	0.269513
Astragalus alpinus	broad-leaved		1.66276	0.749736
Astragalus frigidus	broad-leaved		1.6721	0.745855
Bartsia alpina	broad-leaved		1.90139	0.390935
Betula nana	broad-leaved	0.316229	1.91075	0.498999
Carex saxatilis	broad-leaved		1.79056	0.462072
Cassiope tetragona	broad-leaved	1.59085	2.13349	0.134145
Dryas octopetala	broad-leaved	0.419978	2.05641	0.30963
Empetrum hermaphroditum	broad-leaved	1.62138	2.19137	-0.0154727
Juncus trifidus	broad-leaved		1.76165	0.508932
Luzula multiflora	broad-leaved		1.5326	0.361281
Oxyria digyna	broad-leaved		1.79452	0.545307
Pedicularis hirsuta	broad-leaved		1.69298	0.441774
Pedicularis lapponica	broad-leaved	0.349397	1.95899	0.361728
Phleum alpinum	broad-leaved		1.61856	0.498824
Polygonum viviparum	broad-leaved	0.241164	1.94398	0.569959
Potentilla crantzii	broad-leaved	0.33971	1.91356	0.428135
Rhododendron lapponicum	broad-leaved	1.12219	2.2014	0.271842
Rubus chamaemorus	broad-leaved		1.90309	0.414973
Salix herbacea	broad-leaved	0.421784	1.9127	0.426767
Salix myrsinites	broad-leaved		1.97772	0.394452
Salix polaris	broad-leaved	0.395793	1.92012	0.395326
Salix reticulata	broad-leaved	0.435966	2.03832	0.356026
Sibbaldia procumbens	broad-leaved	0.19813	1.80251	0.460898
Trollius europaeus	broad-leaved		1.55536	0.397713
Vaccinium myrtillus	broad-leaved	0.336432	1.86332	0.212188
Vaccinium uliginosum	broad-leaved	0.346192	1.90423	0.39794
Vaccinium vitis-idaea	broad-leaved	1.56611	2.3913	-0.0132283
Veronica alpina	broad-leaved		1.56104	0.490714
Cassiope tetragona	broad-leaved	1.71719		0.075547
Dryas octopetala	broad-leaved		2.07188	0.371068
Oxyria digyna	broad-leaved		1.85126	0.628389
Polygonum viviparum	broad-leaved		1.90309	0.603144
Salix polaris	broad-leaved		1.86923	0.586587
Rubus corylifolius	broad-leaved	0.778151	1.84771	0.264818	-0.721246	2.26951
Prunus spinosa	broad-leaved	0.763428	1.95468	0.326336	-0.744727	2.06819
Crataegus x macrocarpa	broad-leaved	0.819544	2.04096	0.30963	-0.619789	1.95904
Acer campestre	broad-leaved	0.78533	1.97881	0.287802	-0.721246	2
Ribes uva crispa	broad-leaved	0.908485	1.81248	0.313867	-0.823909	2.18752
Aegle marmelos	broad-leaved		2.05918	0.285557	-0.283997
Amoora rohitika	broad-leaved		1.60853	0.257679	-0.585027
Annona squamosa	broad-leaved		1.73957	0.501059	-0.769551
Anthocephalus cadamba	broad-leaved		2.05614	0.243038	-0.721246
Artocarpus heterophyllus	broad-leaved		2.02407	0.418301	-0.721246
Artocarpus lakoocha	broad-leaved		1.96332	0.298853	-0.769551
Azadirachta indica	broad-leaved		1.89763	0.4843	-0.721246
Bambusa bambos	broad-leaved		1.79379	0.361728	-0.853872
Bauhinia variegata	broad-leaved		1.88195	0.478566	-0.337242
Bombax ceiba	broad-leaved		2.06221	0.20412	-0.721246
Bougainvellia spectabilis	broad-leaved		1.82672	0.436163	-0.958607
Carissa carundu	broad-leaved		1.94645	0.0681859	-0.823909
Cassia fistula	broad-leaved		1.81558	0.342423	-0.769551
Cordia dichotoma	broad-leaved		2.0607	0.326336	-0.769551
Crescentia cujete	broad-leaved		1.83251	0.30103	-0.79588
Dalbergia sissoo	broad-leaved		2.08243	0.320146	-0.744727
Dillenia indica	broad-leaved		1.96332	0.133539	-0.853872
Diospyros embryopteris	broad-leaved		2.00817	0.212188	-0.568636
Eucalyptus globulus	broad-leaved		2.16137	0.103804	-0.823909
Ficus benghalensis	broad-leaved		2.10175	0.11059	-0.958607
Ficus carica	broad-leaved		1.93349	0.499687	-0.677781
Ficus religiosa	broad-leaved		2.03703	0.170262	-0.920819
Ficus rumphii	broad-leaved		1.89818	0.190332	-0.886057
Gardenia jasminoides	broad-leaved		1.91434	0.181844	-0.769551
Grewia asiatica	broad-leaved		2.00518	0.238046	-0.552842
Hamelia patens	broad-leaved		1.82151	0.523746	-0.677781
Hibiscus rosa-sinensis	broad-leaved		1.66839	0.350248	-0.221849
Holoptelia integrifolia	broad-leaved		1.79657	0.439333	-0.79588
Ixora alba	broad-leaved		1.92273	0.342423	-0.568636
Ixora coccinea	broad-leaved		2.00647	0.143015	-0.823909
Kigelia pinnata	broad-leaved		2.03822	0.227887	-0.744727
Lagerstroemia speciosa	broad-leaved		1.94151	0.307496	-0.677781
Litchi chinensis	broad-leaved		2.11025	0.152288	-0.568636
Madhuca indica	broad-leaved		2.05038	0.247973	-0.920819
Magnolia grandiflora	broad-leaved		2.19424	0.127105	-0.920819
Mallotus phillippensis	broad-leaved		1.7574	0.396199	-0.39794
Mangifera indica	broad-leaved		2.13162	0.225309	-0.823909
Mimusops elengi	broad-leaved		2.09864	0.222716	-0.346787
Mimusops hexendra	broad-leaved		2.08955	0.209515	-0.60206
Mitragyna parviflora	broad-leaved		1.95904	0.292256	-0.886057
Morus alba	broad-leaved		1.82802	0.307496	-0.769551
Nyctanthes arbor-tristis	broad-leaved		1.99167	0.230449	-0.537602
Polyalthia longifolia	broad-leaved		1.80686	0.326336	-0.677781
Polyalthia pendulosa	broad-leaved		1.85612	0.403121	-0.619789
Pongamia pinnata	broad-leaved		1.78104	0.445604	-0.823909
Populus deltoides	broad-leaved		2.01157	0.382017	-0.744727
Psidium guajava	broad-leaved		1.95952	0.238046	-0.677781
Pterospermum acerifolia	broad-leaved		1.98091	0.155336	-0.585027
Quisqualis indica	broad-leaved		1.60853	0.463893	-0.366532
Sapindus mykorossi	broad-leaved		1.71933	0.478566	-0.431798
Saraca indica	broad-leaved		1.94645	0.30963	-0.677781
Schleichera oleosa	broad-leaved		1.91009	0.252853	-0.283997
Semecarpus anacardium	broad-leaved		1.82737	0.262451	-0.537602
Spathodea companulata	broad-leaved		2.01578	0.285557	-0.769551
Spondias mangifera	broad-leaved		1.88762	0.245513	-0.823909
Sterculia alata	broad-leaved		1.94201	0.357935	-0.69897
Sterculia colorata	broad-leaved		1.9489	0.217484	-0.744727
Strychnos nuxvomica	broad-leaved		1.90417	0.418301	-0.958607
Swietinia mahogoni	broad-leaved		1.9284	0.181844	-1.04576
Syzygium jambos	broad-leaved		2.06221	0.130334	-1.04576
Tabernaemontana coronaria	broad-leaved		1.74273	0.613842	-0.267606
Tectona grandis	broad-leaved		2.13098	0.176091	-0.769551
Terminalia arjuna	broad-leaved		2.11793	0.164353	-0.721246
Terminalia bellirica	broad-leaved		2.197	-0.0655015	-0.49485
Terminalia chebula	broad-leaved		1.87216	0.287802	-0.568636
Thevetia paruviana	broad-leaved		1.86153	0.283301	-0.886057
Woodfordia fruticosa	broad-leaved		2.04493	0.123852	-0.886057
Ziziphus jujuba	broad-leaved		2.1209	0.245513	-0.721246
Adina cordifolia	broad-leaved	0.954243	2.08743	0.320146	-0.823909
Anogeissus latifolia	broad-leaved		2.16256	0.158362	-1.04576
Bauhinia racemosa	broad-leaved		1.91487	0.392697	-0.744727
Boswellia serrata	broad-leaved		2.09899	0.120574	-0.30103
Bridelia retusa	broad-leaved		1.93601	0.290035	-0.823909
Buchanania lanzan	broad-leaved	1	2.06333	0.298853	-0.886057
Butea monosperma	broad-leaved	1.04139	2.14613	0.404834	-0.853872
Diospyros melanoxylon	broad-leaved	1.04139	2.07809	0.167317	-0.958607
Ficus racemosa	broad-leaved	0.845098	1.96426	0.322219	-0.721246
Gardenia latifolia	broad-leaved		1.94349	0.230449	-0.920819
Hardwickia binata	broad-leaved		2.07628	0.305351	-0.920819
Lagerstroemia parviflora	broad-leaved		2.10517	0.130334	-1.04576
Lannea coromandelica	broad-leaved		1.90687	0.209515	-0.327902
Miliusa tomentosa	broad-leaved		1.93349	0.356026	-0.79588
Pterocarpus marsupium	broad-leaved		2.06258	0.394452	-1
Shorea robusta	broad-leaved	1.11394	1.98856	0.294466	-0.958607
Soymida febrifuga	broad-leaved		2.12743	0.149219	-1.09691
Syzygium cumini	broad-leaved	1.11394	2.13481	0.303196	-0.958607
Terminalia alata	broad-leaved	1	2.02898	0.167317	-0.886057
Wrightia tomentosa	broad-leaved		1.82413	0.363612	-0.886057
Xeromphis uliginosa	broad-leaved		1.9248	0.193125	-0.958607
Ziziphus glaberrima	broad-leaved		1.99782	0.340444	-0.886057
Achillea millefolium	broad-leaved	0	1.92623	0.264325		2.21748	1.17609
Agropyron repens	broad-leaved	0.30103	1.74013	0.25123		2.19312	1.1959
Amorpha canescens	broad-leaved		1.81466	0.376168		2.35025	1.24055
Andropogon gerardi	broad-leaved	0	1.69064	0.226185		2.46687	1.24055
Anemone cylindrica	broad-leaved		1.79493	0.271537		2.13033	1.11727
Bromus inermis	broad-leaved	0.30103	1.74754	0.201937		2.18752	1.13033
Koeleria cristata	broad-leaved	0	1.97126	0.180698		2.07188	1.09342
Lespedeza capitata	broad-leaved		1.79783	0.451789		2.32222	1.42488
Lupinus perennis	broad-leaved		1.73081	0.515256		2.45788
Petalostemum villosum	broad-leaved		1.93271	0.35308		2.41497	1.31597
Schizachyrium scoparium	broad-leaved	0	1.67754	0.177046		2.47129	1.18469
Solidago rigida	broad-leaved	0.30103	1.96524	0.17368		2.19866	1.08279
Sorghastrum nutans	broad-leaved	0.30103	1.74349	0.293633		2.4216	1.22531
Aextoxicon punctatum	broad-leaved	1.73239	2.10292	-0.0177288
Amomyrtus luma	broad-leaved	1.62325	2.14935	0.00432137
Araucaria araucana	broad-leaved	2.45939	2.50307	-0.236572
Drimys winteri	broad-leaved	1.62325	2.25026	-0.0604807
Embothrium coccineum	broad-leaved	1.11394	2.01368	0.240549
Eucryphia cordifolia	broad-leaved	1.63347	2.08831	-0.00436481
Laurelia philippiana	broad-leaved	1.6721	2.12668	0.193125
Myrceugenia planipes	broad-leaved	1.65321	2.04335	0.0569049
Nothofagus betuloides	broad-leaved	1.44716	2.22403	0.075547
Nothofagus nitida	broad-leaved	1.57978	2.17783	0.064458
Ovidia pillo-pillo	broad-leaved	1.39794	1.99482	0.330414
Podocarpus nubigena	broad-leaved	1.94448	2.31069	-0.0362122
Podocarpus saligna	broad-leaved	1.57978	2.24795	-0.0315171
Saxegothaea conspicua	broad-leaved	1.69897	2.12378	0.0293838
Weinmannia trichosperma	broad-leaved	1.38021	2.17393	-0.0457575
Cryptocarya alba	broad-leaved	1.49831	2.16115	-0.0705811		1.85187	0.969183
Drimys winteri	broad-leaved	1.44716	2.13668	0.0334238		1.80754	1.00945
Eucryphia cordifolia	broad-leaved	1.43136	2.13077	-0.09691		1.91434	0.71433
Luma apiculata	broad-leaved	1.30963	2.21467	0.0569049		1.79379	0.98945
Nothofagus dombeyi	broad-leaved	1.15836	2.09151	0.238046		1.9652	0.949878
Podocarpus saligna	broad-leaved	1.38021	2.22185	-0.00877392		1.57054	0.773786
Austrocedrus chilensis	conifer	1.4624	2.29243	0.0374265		1.58883	0.786751
Lomatia hirsuta	broad-leaved	1.38021	2.09151	-0.0757207		1.86273	0.908485
Persea lingue	broad-leaved	1.51851	2.01773	0.00432137		1.89597	0.635484
Podocarpus saligna	broad-leaved	1.44716	2.22915	0.0413927		1.56348	0.673942
Prumnopitys andina	broad-leaved	1.52827	2.16749	-0.0315171		1.58092	0.61066
Aextoxicon punctatum	broad-leaved	1.64345	2.13077	-0.00877392		1.617	0.568202
Dasyphyllum diacanthoides	broad-leaved	1.20412	2.11919	0.0827854		1.86332	0.893651
Drimys winteri	broad-leaved	1.5563	2.25964	-0.21467		1.63849	0.970812
Embothrium coccineum	broad-leaved	0.845098	2.00877	0.181844		2.14301	1.19535
Eucryphia cordifolia	broad-leaved	1.53148	2.11919	0		1.87622	0.767304
Gevuina avellana	broad-leaved	1.716	2.18709	-0.09691		1.76716	0.812913
Laurelia philippiana	broad-leaved	1.43136	2.20761	0.161368		1.59879	0.792392
Luma apiculata	broad-leaved	1.32222	2.14267	0.0413927		1.77085	0.971276
Myrceugenia planipes	broad-leaved	1.5563	2.12494	0		1.66745	0.720159
Nothofagus dombeyi	broad-leaved	1.30103	2.13077	0.11059		1.91062	1.05956
Podocarpus nubigena	broad-leaved	1.89209	2.30103	-0.124939		1.5966	0.631849
Saxegothaea conspicua	broad-leaved	1.5563	2.10791	-0.091515		1.65514	0.682957
Psidium guajava	broad-leaved	1.11394
Amorpha canescens	broad-leaved
Andropogon gerardii	broad-leaved
Dichanthelium oligosanthe	broad-leaved
Lespedeza capitata	broad-leaved
Panicum virgatum	broad-leaved
Crataegus monogyna	broad-leaved	0.729076	2.08279	0.292256		2.01745
Celtis africana	broad-leaved		2.06601	0.429752
Cordia caffra	broad-leaved		1.914	0.549861
Ekebergia capensis	broad-leaved		2.02733	0.574263
Erythrina caffra	broad-leaved		1.77859	0.774882
Hyperacanthus amoenus	broad-leaved		1.94808	0.543199
Isoglossa ciliatus	broad-leaved		1.56416	0.661055
Podocarpus elongatus	broad-leaved		2.44009	0.184691
Teclea natalensis	broad-leaved		1.87713	0.569491
Vepris undulata	broad-leaved		2.01637	0.488551
Zanthoxylum capense	broad-leaved		2.02503	0.414305
Calodendrum capense	broad-leaved		1.65521	0.657152
Celtis africana	broad-leaved		1.84986	0.670617
Curtissia dentata	broad-leaved		2.02319	0.163758
Ekebergia capensis	broad-leaved		2.14691	0.193403
Kiggelaria africana	broad-leaved		1.78042	0.690196
Olea capensis ssp macrocarpa	broad-leaved		2.21824	0.0553783
Podocarpus falcatus	broad-leaved		2.29585	0.0906107
Podocarpus latifolius	broad-leaved		2.48812	0.0253059
Rapanea melanophloeos	broad-leaved		2.42597	0.206556
Rhus chirendensis	broad-leaved		1.99957	0.431203
Scolopia mundii	broad-leaved		2.09366	0.158664
Trichocladus ellipticus	broad-leaved		2.21042	0.142076
Vepris undulata	broad-leaved		1.83505	0.409764
Xymalos monospora	broad-leaved		1.90379	0.344392
Acacia robusta	broad-leaved		2.13549
Adpdytes dimidiata	broad-leaved		2.17522	0.364739
Albizia adinathifolia	broad-leaved		1.98297	0.579784
Balanites maughamii	broad-leaved		2.10347	0.593508
Bequaertiodendron natalense	broad-leaved		2.15107	0.40841
Celtis africana	broad-leaved		1.70421	0.565021
Chaetachme aristata	broad-leaved		2.03905	0.488551
Dalbergia armata	broad-leaved		1.96698	0.678336
Diospyros natalensis	broad-leaved		2.06298	0.27462
Hymenocardia ulmoides	broad-leaved		2.04769	0.323665
Mimusops obovata	broad-leaved		1.99439	0.398287
Monanthotaxis caffra	broad-leaved		1.80493	0.577722
Ochna natalitia	broad-leaved		2.03858
Pancovia golungensis	broad-leaved		2.02246	0.310906
Psychotria capensis	broad-leaved		1.82711
Rhoicissus tomentosa	broad-leaved		1.7693	0.507451
Rothmannia globosa	broad-leaved		1.81276	0.500785
Strychnos decussata	broad-leaved		1.98172	0.387212
Strychnos gerrardii	broad-leaved		1.98801	0.229682
Vepris undulata	broad-leaved		2.02273	0.544192
Diospyros whyteana	broad-leaved		2.09691	0.270446
Hartogiella schinoides	broad-leaved		2.30627	0.126781
Maytenus acuminata	broad-leaved		2.19246	0.203033
Maytenus oleodes	broad-leaved		2.30277	0.114944
Olea europaea ssp africana	broad-leaved		2.34352	0.276462
Olinia ventosa	broad-leaved		2.08831	0.46568
Podocarpus elongatus	broad-leaved		2.47886	0.0729847
Brabejum stellatifolium	broad-leaved		2.40012	-0.0644927
Brachylaena neriifolia	broad-leaved		2.14813
Cunonia capensis	broad-leaved		2.26122
Freylinia lanceolata	broad-leaved		2.44129
Ilex mitis	broad-leaved		2.20135	0.333044
Kiggelaria africana	broad-leaved		1.9974	0.396896
Rapanea melanophloeos	broad-leaved		2.11919	0.269746
Rhus tomentosa	broad-leaved		2.20831
Apodytes dimidiata	broad-leaved		2.1986	0.284431
Curtissia dentata	broad-leaved		2.02872	0.173769
Faurea macnaughtonii	broad-leaved		1.98632	0.281942
Ocotea bullata	broad-leaved		2.06905	0.378398
Olea capensis ssp macrocarpa	broad-leaved		2.16622	0.108227
Olinia ventosa	broad-leaved		1.90904	0.458789
Podocarpus falcatus	broad-leaved		2.27984	0.162564
Podocarpus latifolius	broad-leaved		2.34008	0.0827854
Rapanea melanophloeos	broad-leaved		2.03905	0.199481
Trichocladus crinitus	broad-leaved		2.10824	0.139249
Acacia karroo	broad-leaved		2	0.606274
Celtis africana	broad-leaved		1.95156	0.512284
Chaetachme aristata	broad-leaved		1.75129	0.673942
Chionanthus pegleriae	broad-leaved		2.0511	0.294687
Clausena anisata	broad-leaved		1.95273	0.461649
Diospyros inhacaensis	broad-leaved		2.00922
Diospyros natalensis	broad-leaved		2.10791	0.194514
Dovyalis longispina	broad-leaved		2.07109	0.476687
Drypetes natalensis	broad-leaved		2.07572	0.396025
Eugenia woodii	broad-leaved		2.14026	0.289812
Inhambanella henriquesii	broad-leaved		1.99268	0.358506
Sideroxylon inerme	broad-leaved		2.1512
Strychnos henningsii ssp gerrardii	broad-leaved		2.07366	0.254064
Teclea gerrardii	broad-leaved		1.91973	0.551206
Trema orientalis	broad-leaved		1.97798	0.542825
Ziziphus mucronata	broad-leaved		2.14691	0.311754
Cladostemon kirkii	broad-leaved		1.80939	0.770999
Cleistanthus schlechteri	broad-leaved		2.02228	0.32695
Cola greenwayi	broad-leaved		1.95234	0.422918
Combretum fruticosum	broad-leaved		1.9431	0.482445
Croton steenkampianus	broad-leaved		1.89008	0.714162
Dialium schlechteri	broad-leaved		1.92555	0.516403
Drypetes arguta	broad-leaved		2.05948
Erythrophleum lasianthum	broad-leaved		1.83535	0.686815
Newtonia hildebrandtii	broad-leaved		2.12784
Pteleopsis myrtifolia	broad-leaved		2.03152	0.352375
Salacia leptoclada	broad-leaved		1.96819	0.358696
Strychnos decussata	broad-leaved			0.523226
Suregada zanzibariensis	broad-leaved		2.19518	0.414806
Wrightia natalensis	broad-leaved		1.69272	0.67219
Buxus macowanii	broad-leaved		2.25964	0.547036
Cussonia spicata	broad-leaved		2.07058	0.20871
Ekebergia capensis	broad-leaved		2.1986	0.0374265
Harpephyllum caffrum	broad-leaved		2.32422	0.0305997
Hippobromus pauciflorus	broad-leaved		2.05651	0.319938
Hypoestes verticilliaris	broad-leaved		2.00388	0.279439
Isoglossa ciliatus	broad-leaved		1.71715	0.635584
Olea capensis	broad-leaved		2.30892	0.139249
Olea europaea ssp africana	broad-leaved		2.27901	0.0257154
Olea woodiana	broad-leaved		2.1986	0.131619
Podocarpus falcatus	broad-leaved		2.39686	0.00817418
Ptaeroxylon obliquum	broad-leaved		1.92996	0.391993
Scolopia zeyheri	broad-leaved		2.25493	0.260787
Sideroxylon inerme	broad-leaved		2.27984	0.269513
Teclea natalensis	broad-leaved		1.77392	0.598791
Trichocladus ellipticus	broad-leaved		2.22403	0.162863
Umtiza listeriana	broad-leaved		1.94386	0.475381
Vepris undulata	broad-leaved		1.80493	0.574379
Zanthoxylum capense	broad-leaved		1.93968	0.426836
Castanopsis sieboldii	broad-leaved		2.19033	0.255273		2.01379	0.654766
Quercus myrsinaefolia	broad-leaved		2.13033	0.322219		2.01579	0.948847
Machilus thunbergii	broad-leaved		2.09691	0.20412		2.01703	0.748188
Neolitsea sericea	broad-leaved		2.07918	0.230449		1.82391	0.522879
Abronia villosa	broad-leaved		1.85387	0.69897		2.65031
Malvastrum rotundifolium	broad-leaved		1.84164	0.642465		2.67025
Geraea canescens	broad-leaved		1.82391	0.732394		2.64933
Camissonia claviformis	broad-leaved		1.88606	0.549003		2.61278
Camissonia brevipes	broad-leaved		1.86967	0.436163		2.55023
Abutilon theophrastii	broad-leaved		1.60206	0.594393		2.54158
Ambrosia trifida	broad-leaved		1.74473	0.644439		2.59329
Chenopodium album	broad-leaved		1.81531	0.580925		2.53275
Polygonum pensylvanicum	broad-leaved		1.77469	0.44248		2.43775
Maytenus oleodes	broad-leaved		2.25959	0.117271		1.60373	0.585504
Rhus tomentosa	broad-leaved		2.27623	0.0791812		1.593
Acer platanoides	broad-leaved		1.68305
Alnus incana	broad-leaved		1.82607
Andromeda polifolia	broad-leaved		2.11926
Aronia melanocarpa	broad-leaved		2.03141
Betula nana	broad-leaved		2.02938
Betula pubescens	broad-leaved		1.79934
Chamaedaphne calyculata	broad-leaved		2.00647
Crataegus monogyna	broad-leaved		2.04139
Juniperus communis	conifer		1.97543
Populus tremula	broad-leaved		1.93802
Prunus spinosa	broad-leaved		1.75891
Rhamnus cathartica	broad-leaved		1.80618
Ribes spicatum	broad-leaved		1.41664
Salix fragilus	broad-leaved		2.05538
Salix lapponum	broad-leaved		2.01326
Sorbus aucuparia	broad-leaved		1.81954
Tilia cordata	broad-leaved		1.40654
Vaccinium myrtillus	broad-leaved		1.60423
Vaccinium uliginosum	broad-leaved		1.76193
Populus tremula	broad-leaved		2.0086	0.332438
Tilia cordata	broad-leaved		1.88024	0.376577
Castanopsis sieboldii	broad-leaved	1.47712
Quercus salicina	broad-leaved	1.38021
Quercus acuta	broad-leaved	1.54158
Machilus thunbergii	broad-leaved	1.32222
Neolitsea sericea	broad-leaved	1.51851
Cinnamomum japonicum	broad-leaved	1.74663
Myrsine seguinii	broad-leaved	1.71265
Symplocos prunifolia	broad-leaved	1.25527
Illicium anisatum	broad-leaved	1.44091
Cleyera japonica	broad-leaved	1.47712
Eurya japonica	broad-leaved	1.47712
Astronium graveolens	broad-leaved	0.944483	1.77469	0.42198	-0.855846
Bauhinia megalandra	broad-leaved	0.977724	1.46597	0.494548	-0.682984
Bursera simaruba	broad-leaved	0.954243	1.70115	0.43177	-0.738207
Capparis flexuosa	broad-leaved	1.07918	1.94692	0.517506	-0.768696
Erythroxylum cumanense	broad-leaved	0.973128	1.82391	0.492987	-0.801489
Erythroxylum densum	broad-leaved	1.07918	1.88273	0.420365	-0.917994
Erythroxylum orinocense	broad-leaved	0.944483	1.6925	0.452004	-0.818863
Eugenia caseariodes	broad-leaved	0.977724	1.80688	0.459672	-0.639827
Sapindus saponaria	broad-leaved	0.977724	1.7122	0.452004	-0.846301
Tabebuia chrysantha	broad-leaved	0.954243	1.64975	0.45372	-0.784783
Chionanthus sp1	broad-leaved	1.1726	2.0317	0.215373
Diplospora malaccensis	broad-leaved	1.35468	2.02811	0.3638
Dipterocarpus sublamellatus	broad-leaved	1.10857	2.12852	0.211921
Elateriospermum tapos	broad-leaved	1.06258	2.06424	0.22763
Eugenia rugosa	broad-leaved	1.3653	2.20358	0.0715138
Ganua sp1	broad-leaved	1.27462	2.29935	0.147676
Homalium dictyoneurum	broad-leaved	1.54407	1.9093	0.275081
Macaranga lowii	broad-leaved	1.27531	1.89765	0.190051
Mangifera foetida	broad-leaved	1.36305	2.15183	0.0881361
Monocarpia marginalis	broad-leaved	1.4188	1.81987	0.55461
Ptychopyxis caput-medusae	broad-leaved	0.849419	2.10356	0.230193
Xanthophyllum stipitatum	broad-leaved	1.16227	2.0923	0.303196
Aporosa bracteosa	broad-leaved		1.89997			1.44404
Aporosa lunata	broad-leaved		2.08778			1.49136
Aporosa microstachya	broad-leaved		1.65995			1.49415
Baccaurea parviflora	broad-leaved		1.94386			1.40993
Baccaurea racemosa	broad-leaved		2.09583			1.34242
Baccaurea reticulata	broad-leaved		2.05998			1.46982
Diospyros cauliflora	broad-leaved		1.86806			1.75891
Diospyros maingayi	broad-leaved		2.28567			1.46389
Diospyros nutans	broad-leaved		2.03105			1.35984
Garcinia bancana	broad-leaved		2.1986			1.60853
Garcinia malaccensis	broad-leaved		2.08566			1.26717
Garcinia small sp	broad-leaved		1.87844			1.50379
Holcus lanatus	broad-leaved		1.42196
Brachypodium pinnatum	broad-leaved		1.65931
Leontodon hispidus	broad-leaved		1.56788
Plantago lanceolata	broad-leaved		1.67021
Deschampsia flexuosa	broad-leaved		1.76125
Molinia caerulea	broad-leaved		1.64428
Festuca rubra	broad-leaved		1.88748
Plantago lanceolata	broad-leaved		1.71322
Trifolium pratense	broad-leaved		1.63605
Molinia caerulea	broad-leaved		1.67129
Aegiphila lhotzkiana	broad-leaved		2.0792	0.426511		1.89209
Annona coriaceae	broad-leaved		2.17321	0.320146		1.79239
Aspidosperma tomentosum	broad-leaved		2.14923	0.0128372		1.85733
Bauhinia holophylla	broad-leaved		2.15534	0.383815		1.86332
Bowdichia virgilioides	broad-leaved		2.22534	0.374748		1.74036
Campomanesia aromatica	broad-leaved		2.17321	0.170262		1.8451
Caryocar brasiliense	broad-leaved		2.07186	0.276462		1.90309
Connarus suberosus	broad-leaved		2.17321	0.187521		1.91381
Davilla rugosa	broad-leaved		2.22012	0.146128		1.78533
Didymopanax vinosum	broad-leaved		2.17025	0.260071		2.07555
Duguetia furfuracea	broad-leaved		2.22272	0.276462		1.76343
Gochnatia floribunda	broad-leaved		2.22534	0.206826		1.98227
Kielmeyera coriacea	broad-leaved		2.31176	0.0374265		1.70757
Miconia albicans	broad-leaved		2.18469	0.164353		1.92428
Miconia ligustroides	broad-leaved		2.11725	0.187521		2.02938
Piptocarpha rotundifolia	broad-leaved		2.20412	0.294466		1.88649
Qualea dichotoma	broad-leaved		2.15534	0.178977		1.88081
Styrax camporum	broad-leaved		2.32221	0.214844		1.59106
Tibouchina stenocarpa	broad-leaved		2.13354	0.206826		2.16435
Tocoyena formosa	broad-leaved		2.19866	0.269513		1.61278
Callitris intratropica	conifer		2.34679	0.045323	-1.16115	1.5563
Cochlospermum fraseri	broad-leaved	0.518514	1.77728	0.245513	-1.09691	2.1959
Corymbia foelscheana	broad-leaved	0.991226	2.34679	-0.107905	-1.4318	1.77085
Melaleuca viridiflora	broad-leaved	1.0086	2.36653	-0.113509	-1.4318	1.78533
Planchonia careya	broad-leaved	0.929419	2.00436	0.20412	-1.07058	2
Syzygium eucalyptoides ssp bleeseri	broad-leaved	1.05308	2.10237	0.064458	-1.19382	1.81954
Terminalia ferdinandiana	broad-leaved	0.681241	2.08092	0.181844	-1.09151	2.03342
Xanthostemon paradoxus	broad-leaved	1.02119	2.13668	0.0606978	-1.3098	1.92942
Brachychiton megaphyllus	broad-leaved	0.845098	1.9914	0.305351	-0.896196	2.03342
Buchanania obovata	broad-leaved	1.04139	2.21467	0.0606978	-1.14267	1.80618
Erythrophleum chlorostachys	broad-leaved	0.977724	2	0.357935	-1.09151	2.04139
Eucalyptus tetrodonta	broad-leaved	0.913814	2.25964	-0.148742	-1.48149	1.79239
Planchonia careya	broad-leaved	0.845098	1.92445	0.260071	-0.954677	2.1038
Syzygium suborbiculare	broad-leaved	0.977724	2.14267	0.0791812	-1.20066	1.91381
Terminalia ferdinandiana	broad-leaved	0.716003	2.00436	0.178977	-1.04576	1.97313
Eucalyptus clavigera	broad-leaved		2.14569	0.0170333		1.9345
Eucalyptus miniata	broad-leaved		2.09313	0.230449		2.11727
Acacia auriculiformis	broad-leaved	1	2.02228	0.394452	-0.920819	2.13354
Lophostemon lactifluus	broad-leaved	0.939519	2.08092	-0.0177288	-1.3098	1.83251
Melaleuca viridiflora	broad-leaved	0.991226	2.35655	-0.21467	-1.55284	1.80618
Ficus racemosa	broad-leaved	0.778151	1.81816	0.382017	-0.759451	2.39794
Ficus scobina	broad-leaved	0.681241	1.92082	0.478566	-0.730487	2.18184
Mallotus nesophilus	broad-leaved	0.69897	1.87943	0.350248	-0.832683	2.24304
Melaleuca leucadendra	broad-leaved	0.913814	2.17393	0.0211893	-1.08619	2.11059
Terminalia microcarpa	broad-leaved	0.845098	1.92082	0.357935	-0.774691	2.22272
Wrightia pubescens	broad-leaved	0.832509	1.7167	0.510545	-0.785156	2.26007
Elymus nutans	broad-leaved		1.7007
Hordeum turkestanicum	broad-leaved		1.6637
Leymus pubescens	broad-leaved		1.98182
Potentilla anserina	broad-leaved		1.89265
Oxyria digyna	broad-leaved		1.64836
Calamagrostis anthoxanthoides	broad-leaved		1.70157
Chenopodium album	broad-leaved		1.23805	0.647383
Echinops ritro	broad-leaved		2.07918	0.162019
Tanacetum vulgare	broad-leaved		1.63144	0.381211
Trifolium pratense	broad-leaved		1.58883	0.568202
Trifolium repens	broad-leaved		1.55267	0.558709
Chamaenerion angustifolium	broad-leaved		1.5563	0.521138
Polygonum bistorta	broad-leaved		1.38021	0.321205
Caltha palustris	broad-leaved		1.44716	0.632457
Trollius europaeus	broad-leaved		1.63043	0.620136
Filipendula ulmaria	broad-leaved		1.72591	0.271842
Veronica chamaedrys	broad-leaved		1.50515	0.247973
Orthilia secunda	broad-leaved		1.93298	0.173186
Vaccinium myrtillus	broad-leaved		1.35793	0.344392
Abies lasiocarpa	conifer	1.98227	2.40561	0.0128372		1.0607	0.544068
Acomastylis rosii	broad-leaved	0.30103	1.92445	0.39794		2.08063	1.32015
Arctostaphylos uva-ursi	broad-leaved	1.25527	2.10568	0.0899051		1.50243	0.724276
Bistorta bistortoides	broad-leaved	0.30103	1.91721	0.591065		2.13354	1.45332
Picea engelmanii	conifer	1.95424	2.48545	0.0128372		1.06446	0.50515
Pinus flexilis	conifer	1.5563	2.56384	0.049218		1.4133	0.60206
Psychrophila leptosepala	broad-leaved	0.39794	1.89963	0.462398		2.04139	1.18469
Salix glauca	broad-leaved	0.477121	1.9108	0.419956		2.09447	1.24797
Salix planifolia	broad-leaved	0.477121	1.91009	0.426511		2.18013	1.39445
Vaccinium myrtillus	broad-leaved	0.544068	1.767	0.369216		2.01912	1.02531
Acer rubrum	broad-leaved	0.716003	1.79588	0.263636		2.09691	1.10721
Eupatorium rugesum	broad-leaved	0.681241	1.32883	0.593286		2.58206	1.65031
Galax aphylla	broad-leaved	1.25527	1.90309	-0.05061		1.89209	0.986772
Helianthus microcephalus	broad-leaved	0.612784	1.60033	0.418301		2.4143	1.55388
Kalmia latifolia	broad-leaved	1.5563	2.02457	0.0606978		1.63649	0.94939
Liriodendron tulipifera	broad-leaved	0.724276	1.78252	0.350248		2.23045	1.14613
Pinus rigida	conifer	1.51851	2.31069	0.064458		1.74586	0.716003
Pinus strobus	conifer	1.32222	2.03621	0.130334		1.70415	0.716003
Podophyllum peltatum	broad-leaved	0.477121	1.4908	0.618048		2.41664	1.42813
Quercus coccinea	broad-leaved	0.755875	1.92812	0.238046		2.04532	1.0607
Rhododendron maximum	broad-leaved	1.68124	2.31069	-0.0655015		1.5302	0.579784
Robinia pseudoacacia	broad-leaved	0.662758	1.5784	0.636488		2.38578	1.50515
Tsuga canadensis	conifer	1.77815	2.08831	-0.00436481		1.64246	0.491362
Veratrum parviflorum	broad-leaved	0.556303	1.52724			2.16137	1.26951
Atriplex canescens	broad-leaved	0.845098	2.40121	0.322219		1.89763	1.08991
Baccharis angustifolia	broad-leaved	0.39794	1.97864	0.290035		2.29623	1.23805
Eleagnus angustifolia	broad-leaved	0.477121	1.90658	0.599883		2.24329	1.36922
Gutierrezia sarothrae	broad-leaved	0.778151	2.46982	0.225309		1.77085	1.15534
Juniperus monosperma	conifer	1.89209	2.89279	0.0681859		1.06446	0.681241
Larrea tridentata	broad-leaved	1.07918	2.4023	0.287802		1.92942	0.892095
Pinus edulis	conifer	1.81954	2.61083	0.0253059		1.1038
Populus fremontii	broad-leaved	0.477121	2.07676	0.220108		2.07918	1.16435
Prosopis glandulosa	broad-leaved	0.845098	2.29073	0.396199		1.96379	0.939519
Quercus turbinella	broad-leaved	0.90309	2.18046	0.187521			1.19312
Lyonia lucida	broad-leaved	1.29003	2.37572	-0.0362122		1.43457	0.763428
Persea borbonia	broad-leaved	1.25527	2.04576	0.214844		1.79239	0.826075
Pinus palustris	conifer	1.50515	2.40671	-0.0861861		1.22272	0.556303
Pinus serotina	conifer	1.43136	2.44491	-0.0861861		1.19866	0.69897
Pterocaulon pycnostachyum	broad-leaved	0.70757	1.90798	0.294466		2.00561	1.18752
Quercus laevis	broad-leaved	0.880814	2.01055	0.0606978		1.81823	0.799341
Quercus virginia var geminata	broad-leaved	1.04139	2.20135	0.187521		1.90526	0.755875
Taxodium distichum	conifer	0.812913	2.10791	0.075547		1.81158	1.01284
Vaccinium arboreum	broad-leaved	1.04139	2.09637	0.0827854		1.72016	0.80618
Vaccinium corymbosum	broad-leaved	0.875061	2.00922	0.0899051		1.78247	1.1038
Aspidosperma album	broad-leaved	1.51851	2.08302	0.0293838		1.71767
Bellucia grossularioides	broad-leaved	0.924279	2.10735	0.227887		2.04727	0.897627
Caraipa heterocarpa	broad-leaved	1.58546	2.16877	-0.0315171		1.58883
Cecropia ficifolia	broad-leaved	0.431364	1.83983	0.392697		2.40175	1.25527
Clidemia sericea	broad-leaved	0.70757	1.89825	0.217484		2.06258
Eperua leucantha	broad-leaved	1.64345	2.02182	0.09691		1.54531
Eperua purpurea	broad-leaved	1.63347		0.181844		1.74115
Goupia glabra	broad-leaved	1.0569	1.88639	0.178977		1.99564
Leguminosae sp	broad-leaved	1.69897	2.14206	0.330414		1.67852
Licania heteromorpha	broad-leaved	1.60206	2.17198	0.113943		1.73078	0.716003
Manihot esculenta	broad-leaved	0.176091	1.56051	0.599883		2.67015	1.52244
Miconia dispar	broad-leaved	1.07918	2.04431	0.201397		1.96284	0.716003
Micrandra sprucei	broad-leaved	1.69897	2.23359	0.0334238		1.63649
Micropholis magueirei	broad-leaved	1.70329	2.25727	-0.09691
Neea obovata	broad-leaved	1.07918	1.98674	0.264818		1.81291
Ocotea costulata	broad-leaved	1.59106	2.11464	0.176091		1.65225	0.69897
Protium sp1	broad-leaved	1.51851	2.06248	-0.0655015		1.54033	0.778151
Protium sp2	broad-leaved	1.54407	2.08619	0.247973		1.82737	0.763428
Protium sp3	broad-leaved	1.70757	2.23582	0.0128372		1.51851
Retiniphyllum truncatum	broad-leaved	1.21748	2.08197	-0.167491		1.66745
Rhodognaphalopsis humilis	broad-leaved	1.38021	2.12378	-0.107905		1.67394
Solanum straminifolia	broad-leaved	0.30103	1.54151	0.593286		2.57807	1.53148
Vismia japurensis	broad-leaved	0.838849	1.97716	0.214844		2.14737	0.968483
Vismia lauriformis	broad-leaved	0.653213	1.94195	0.252853		2.20222	1.04139
Acer rubrum	broad-leaved	0.740363	1.77989	0.322219		2.03342	1.09342
Acer saccharum	broad-leaved	0.740363	1.90309	0.267172		2	0.845098
Andromeda glaucophylla	broad-leaved	1.11394	2.12057	0.143015		1.84696
Arisaema triphyllum	broad-leaved		1.42022	0.803457
Baptisia leucophaea	broad-leaved	0.544068	1.97359	0.555094		2.2014	1.55991
Betula nigra	broad-leaved	0.716003	1.92812	0.357935		2.07188
Betula pumilla	broad-leaved	0.778151	2.03141	0.178977		1.82737
Carya ovata	broad-leaved	0.748188	1.95078	0.296665		1.95904
Caulophyllum thalictroides	broad-leaved		1.37161	0.764923		2.40483
Celtis occidentalis	broad-leaved	0.740363	1.91721	0.378398		2.06819
Chamaedaphne calyculata	broad-leaved	1.11394	1.93952	0.075547		1.84572
Cornus florida	broad-leaved	0.748188	1.96658	0.146128		1.92942
Cornus racemosa	broad-leaved	0.778151	1.91009	0.161368		1.97772
Dentaria laciniata	broad-leaved	0.0413927	1.52724	0.724276		2.63548
Echinacea purpurea	broad-leaved	0.60206	1.8911	0.176091		2.08955	1.23553
Erythronium americanum	broad-leaved	0.278754	1.65365	0.623249		2.41996	1.716
Fraxinus americana	broad-leaved	0.755875	1.86012	0.296665		2.08279
Ilex verticillata	broad-leaved	0.778151	1.95713	0.190332		1.86213
Juglans nigra	broad-leaved	0.69897	1.5157	0.471292		2.24304
Juniperus virginiana	conifer		2.52288	0.214844		1.51851
Larix decidua	conifer	0.778151	1.85699	0.322219		2.0086
Larix laricina	conifer	0.778151	2.07918	0.155336		1.7185
Lonicera bella	broad-leaved	0.826075	1.92082	0.278754		2.07188
Picea glauca	conifer	1.77815	2.45593	0.0934217		1.36173	0.60206
Picea mariana	conifer	1.77815	2.46852	0.0827854		1.5682
Pinus banksiana	conifer	1.43136	2.38722	0.0934217		1.49136	0.778151
Pinus resinosa	conifer	1.5563	2.46852	0.0681859		1.38021
Pinus strobus	conifer	1.32222	2.13077	0.230449		1.65321	0.672098
Pinus sylvestris	conifer	1.43136	2.46852	0.143015		1.54407	0.792392
Podophyllum peltatum	broad-leaved	0.477121	1.51004	0.650308		2.38739
Populus deltoides	broad-leaved	0.69897	1.95861	0.372912		2.20952	1.14613
Populus tremuloides	broad-leaved	0.69897	1.91721	0.344392		2.15229	1.3483
Prunus serotina	broad-leaved	0.740363	2.00436	0.31597		2.09691
Quercus ellipsoidalis	broad-leaved	0.778151	2.02228	0.322219		2.09691	1.11727
Quercus macrocarpa	broad-leaved	0.778151	1.9431	0.371068		2.17435
Rhamnus cathartica	broad-leaved	0.832509	1.9393	0.361728		2.13033
Sanguinaria canadensis	broad-leaved	0.60206	1.49349	0.729165		2.40654	1.81291
Sarracenia purpurea	broad-leaved	1.47712	2.10721	0.0569049		1.35793
Silphium integrifolium	broad-leaved	0.60206	1.9345	0.220108		2.06446	1.28103
Silphium terebinthinaceum	broad-leaved	0.477121	1.87615	0.158362		2.24304	1.24551
Thuja occidentalis	conifer	1.68124	2.3483	-0.119186		1.50515
Trillium grandiflora	broad-leaved	0.568202	1.44733	0.71265		2.32015
Ulmus americana	broad-leaved	0.763428	2.07572	0.285557		2.06446
Acer negundo	broad-leaved		1.56864	0.39794	-0.769551
Acer pensylvanicum	broad-leaved		1.47756	0.278754	-0.568636
Acer rubrum	broad-leaved		1.88606	0.30103	-0.721246
Acer saccharum	broad-leaved		1.67162	0.342423	-0.552842
Rhus typhina	broad-leaved		1.81816	0.491362	-0.408935
Alnus rugosa	broad-leaved		1.77728	0.477121	-0.657577
Betula alleghaniensis	broad-leaved		1.66354	0.342423	-0.769551
Betula papyrifera	broad-leaved		1.86328	0.342423	-0.677781
Carpinus caroliniana	broad-leaved		1.73283	0.30103	-0.744727
Ostrya virginiana	broad-leaved		1.56864	0.342423	-0.60206
Cornus alternifolia	broad-leaved		1.60206	0.230449	-0.958607
Fagus grandifolia	broad-leaved		1.73283	0.322219	-0.769551
Quercus alba	broad-leaved		1.68194	0.342423	-0.677781
Quercus rubra	broad-leaved		1.73993	0.255273	-0.69897
Quercus macrocarpa	broad-leaved		1.98297	0.322219	-0.721246
Carya cordiformis	broad-leaved		1.64397	0.414973	-0.49485
Carya ovata	broad-leaved		1.7167	0.342423	-0.638272
Juglans cinerea	broad-leaved		1.78516	0.414973	-0.408935
Fraxinus americana	broad-leaved		1.81816	0.322219	-0.455932
Fraxinus nigra	broad-leaved		1.85699	0.322219	-0.920819
Fraxinus pennsylvanica	broad-leaved		1.9431	0.255273	-0.677781
Prunus serotina	broad-leaved		1.77728	0.431364	-0.853872
Prunus pennsylvanica	broad-leaved		1.69897	0.380211	-0.69897
Prunus virginiana	broad-leaved		1.92445	0.447158	-0.920819
Malus sp	broad-leaved		1.8962	0.39794	-0.853872
Populus balsamifera	broad-leaved		1.85078	0.30103	-0.537602
Populus deltoides	broad-leaved		1.85078	0.380211	-0.638272
Populus grandidentata	broad-leaved		1.7986	0.39794	-0.619789
Populus tremuloides	broad-leaved		1.8962	0.414973	-0.619789
Salix nigra	broad-leaved		1.74715	0.39794	-0.886057
Tilia americana	broad-leaved		1.73993	0.477121	-0.431798
Ulmus americana	broad-leaved		1.79317	0.380211	-0.638272
Ulmus rubra	broad-leaved		1.77728	0.39794	-0.744727
Ulmus thomasii	broad-leaved		1.80688	0.361728	-0.468521
Acacia mimula	broad-leaved		2.26962	0.378216
Buchanania obovata	broad-leaved		2.11805	0.243658
Erythrophleum chlorostachys	broad-leaved		1.96344	0.373157
Eucalyptus clavigera	broad-leaved		2.26761	0.0843379
Eucalyptus miniata	broad-leaved		2.25959	0.0460447
Eucalyptus porrecta	broad-leaved		2.10888	0.0892868
Eucalyptus tectifica	broad-leaved		2.11957	0.203848
Eucalyptus tetradonta	broad-leaved		2.34668	-0.0417302
Livistona humilis	broad-leaved		2.37212	0.0525016
Planchonia careya	broad-leaved		2.05306	0.308564
Xanthostemon paradoxus	broad-leaved		2.11126	0.171141
Acacia dimidiata	broad-leaved		2.30016	0.333649
Buchanania obovata	broad-leaved		2.20761	0.0640834
Eucalyptus bleeseri	broad-leaved		2.35952	-0.0452752
Eucalyptus conferiflora	broad-leaved		2.14752	0.0696681
Eucalyptus miniata	broad-leaved		2.32698	0.0392819
Eucalyptus tectifica	broad-leaved		2.32057	0.0301948
Eucalyptus tetrodonta	broad-leaved		2.40506	-0.0346807
Grevillea pyramidalis	conifer		2.98716	-0.253366
Lysiphyllum cunninghamii	broad-leaved		2.15927	0.185542
Petalostigma quadriloculare	broad-leaved		2.30627	-0.162412
Planchonia careya	broad-leaved		2.20482	0.257918
Acacia holosericea	broad-leaved		2.44612	0.289589
Carissa lanceolata	broad-leaved		2.34969	0.108565
Eucalyptus brevifolia	broad-leaved		2.4681	-0.0858332
Eucalyptus pruinosa	broad-leaved		2.38265	0.0265333
Eucalyptus pruinosa	broad-leaved		2.34775	0.122216
Eucalyptus tectifica	broad-leaved		2.42174	0.0398106
Eucalyptus terminalis	broad-leaved		2.41266	-0.0455967
Hakea arborescens	broad-leaved		2.6038	-0.247184
Lysiphyllum cunninghamii	broad-leaved		2.14388	0.119586
Melaleuca sp	broad-leaved		2.78252	0.0103
Cochlospermum fraseri	broad-leaved		2.06651	0.149219
Cycas armstrongii	broad-leaved		2.16685	0.323046
Erythrophleum chlorostachys	broad-leaved		2.00524	0.362294
Eucalyptus miniata	broad-leaved		2.29814	0.0402066
Eucalyptus nesophilla	broad-leaved		2.20204	0.103633
Eucalyptus tetrodonta	broad-leaved		2.34135	0.0400746
Livistona humilis	broad-leaved		2.30277	0.243038
Persoonia falcata	broad-leaved		2.31876	-0.138466
Eucalyptus brevifolia	broad-leaved		2.46471	-0.0449138
Eucalyptus terminalis	broad-leaved		2.45346	0.0138901
Grevillea dimidiata	broad-leaved		2.52288	-0.111821
Hakea leucoptera	conifer		3.16749	-0.272459
Lysiphyllum cunninghamii	broad-leaved		1.99827	0.390759
Terminalia arostrata	broad-leaved		2.35655	0.0285713
Terminalia canescens	broad-leaved		2.28316	-0.0186345
Ventilago viminalis	broad-leaved		2.68194	0.176381
Asclepias syriaca	broad-leaved		1.73518
Chrysanthemum leucanthemum	broad-leaved		1.767
Cichorium intybus	broad-leaved		1.75696
Dactylis glomerata	broad-leaved		1.65561
Spiraea tomentosa	broad-leaved		1.75449
Trifolium pratense	broad-leaved		1.72354
Acer rubrum	broad-leaved	0.778151	1.84662	0.324282	-1.03152	1.92766
Alnus rugosa	broad-leaved	0.778151	1.9576	0.403121	-0.995679	2.03576
Andromeda glaucophylla	broad-leaved	1.25527	2.37278	0.0569049	-1.20066	1.83806
Aronia melanocarpa	broad-leaved	0.778151	1.98842	0.240549	-0.856985	2.09624
Betula populifolia	broad-leaved	0.778151	1.76675	0.252853	-1.02228	2.08849
Betula pumila	broad-leaved	0.778151	1.93263	0.257679	-0.978811	1.88086
Chamaedaphne calyculata	broad-leaved	1.25527	2.07258	0.133539	-1.09691	2.19748
Comptonia peregrina	broad-leaved	0.778151	1.87539	0.344392	-1.11351	2.21887
Gaylussacia baccata	broad-leaved	0.778151	1.82961	0.220108	-1.08092	2.09448
Ilex verticillata	broad-leaved	0.778151	1.71656	0.403121	-1.01323	2.1661
Kalmia angustifolia	broad-leaved	1.25527	2.07816	0.0863598	-1.14267	1.85561
Kalmia polifolia	broad-leaved	1.25527	2.15431	0.113943	-1.1549	2.19591
Larix laricina	conifer	0.778151		0.10721	-1.09691	1.82308
Ledum groenlandicum	broad-leaved	1.25527	2.05212	0.149219	-1.0655	2.01693
Nemopanthus mucronata	broad-leaved	0.778151	1.79696	0.209515	-1	2.02735
Picea glauca	conifer	1.47712		0.149219	-0.987163	1.68276
Picea mariana	conifer	1.47712		0.00860017	-1.0655	1.43572
Pinus strobus	conifer	1.25527		0.0863598	-1.00877	1.55382
Populus tremuloides	broad-leaved	0.778151	1.96112	0.287802	-1.05061	1.93949
Rubus hispidus	broad-leaved	0.778151	1.84044	0.305351	-0.910095	2.18225
Salix fragilis	broad-leaved	0.778151	1.98219	0.424882	-0.623423	1.99558
Sarracenia purpurea	broad-leaved	1.47712	1.94503	0.0374265	-1.07058	1.47326
Spiraea alba	broad-leaved	0.778151	1.90945	0.318063	-0.950782	2.1661
Spiraea tomentosa	broad-leaved	0.778151	1.87642	0.269513	-0.725842	2.20848
Thuja occidentalis	conifer	1.25527		0.10721	-0.89279	1.5112
Ulmus americana	broad-leaved	0.778151	1.85557	0.287802	-0.844664	1.88766
Vaccinium myrtilLoides	broad-leaved	0.778151	1.94774	0.187521	-1.1549	2.09205
Viburnum cassinoides	broad-leaved	0.778151	1.94248	0.318063	-0.974694	1.91618
Beureria cumanensis	broad-leaved	0.929419	1.93554	0.458133		2.06009
Capparis verrucosa	broad-leaved	1.07918	2.05061	0.49912		1.78824
Capparis aristiguetae	broad-leaved	1.07918	2.16115	0.345502		1.70217
Coursetia arborea	broad-leaved	0.778151	1.57187	0.498335		2.26698
Lonchocarpus dipteroneurus	broad-leaved	0.845098	1.61618	0.610519		2.35694
Mansoa verrucifera	broad-leaved	0.778151	1.75696	0.433624		2.01389
Memora sp	broad-leaved	1.04139	2.10791	0.311302		1.76716
Morisonia americana	broad-leaved	1.07918	2.16749	0.418122		1.73014
Pithecellobium dulce	broad-leaved	0.929419	1.82102	0.413197		2.12837
Pithecellobium ligustrinum	broad-leaved	0.977724	1.81248	0.543742		2.15131
Aspidosperma album	broad-leaved		2.26761	0.158061	-1.11919
Catostemma sp	broad-leaved		2.3279	0.0153598	-1.17393
Clusia sp	broad-leaved		2.3279	0.0374265	-1.27572
Heteropteris sp	broad-leaved		2.22185	0.148294	-1.24413
Hirtella punctillata	broad-leaved		2.31876	-0.274905	-1.50864
Humiria balsamifera	broad-leaved		2.30103	-0.161151	-1.36653
Macairea rufescens	broad-leaved		2.35655	-0.107349	-1.56864
Mouriri incitheca	broad-leaved		2.56864	-0.357535	-1.65758
Ocotea esmereldana	broad-leaved		2.25964	-0.0996329	-1.23657
Remijia morilloi	broad-leaved		2.55284	-0.388277	-1.5376
Retiniphyllum concolor	broad-leaved		2.21467	-0.0931265	-1.4437
Rodognaphalopsis discolor	broad-leaved		2.56864	-0.223299	-1.46852
Allocasuarina pusilla	conifer		2.58503	0.0253059	-1.33724
Banksia marginata	broad-leaved		2.34679	-0.200659	-1.92082
Banksia ornata	broad-leaved		2.42022	-0.173925	-1.79588
Calytrix alpestris	broad-leaved		2.67778	0.0170333	-1.34679
Hibbertia riparia	broad-leaved		2.27572	0.0334238	-1.3279
Hibbertia sericea	broad-leaved		2.67778	0.0211893	-1.34679
Hypolaena fastigiata	conifer		2.67778	-0.259637	-2.09691
Lepidosperma carphoides	conifer		2.63827	-0.244125	-1.72125
Lepidosperma laterale	conifer		2.63827	-0.130768	-1.55284
Phyllota remota	broad-leaved		2.25181	0.155336	-1.18046
Xanthorrhoea australis	conifer		2.74473	-0.327902	-1.85387
Baeckea crassifolia	broad-leaved		2.5376	-0.0268721	-1.40894
Eucalyptus foecunda	broad-leaved		2.52288	-0.00436481	-1.284
Eucalyptus incrassata	broad-leaved		2.65758	-0.107905	-1.5376
Hakea muellerana	conifer		2.49485	-0.267606	-1.74473
Lepidosperma laterale	conifer		2.58503	-0.346787	-1.88606
Melaleuca uncinata	conifer		2.65758	0.09691	-1.25181
Banksia marginata	broad-leaved		2.17393	-0.0705811	-1.46852
Eucalyptus baxteri	broad-leaved		2.39794	-0.0861861	-1.48149
Eucalyptus obliqua	broad-leaved		2.35655	-0.0268721	-1.33724
Lepidosperma semiteres	conifer		2.65758	-0.259637	-1.74473
Leptospermum myrsinoides	broad-leaved		2.17393	0.0334238	-1.3279
Capparis odoratissima	broad-leaved
Achillea millefolium	broad-leaved		1.88606	0.40824		2.42144	1.24304
Agastache foeniculum	broad-leaved		1.96658	0.436163		2.25873
Agropyron repens	broad-leaved	0.237048	1.79048	0.390935		2.59512	1.13033
Agrostis scabra	broad-leaved		1.92812	0.190332		2.57294	1.50515
Ambrosia artemisiifolia	broad-leaved	0.1749	1.88941	0.40654		2.54834	1.41664
Andropogon gerardi	broad-leaved	0.37902	1.9914	0.0934217		2.48136	1.13354
Anemone cylindrica	broad-leaved	0.321028	1.97062	0.220108		2.2169	1.10721
Asclepias syriaca	broad-leaved	0.147316	1.8041	0.434569		2.45358	1.44871
Asclepias tuberosa	broad-leaved		1.91721	0.32838		2.13586	1.27646
Aster azureus	broad-leaved		2.00877	0.20412		2.12476	1.24055
Aster ericoides	broad-leaved		2.10791	0.25042		2.19959	1.30103
Aster novaeanglieae	broad-leaved		1.81816	0.382017		2.36082
Astragalus candensis	broad-leaved		1.97469	0.61595		2.43693	1.31806
Bouteloua curtipendula	broad-leaved		2.02228	0.049218		2.41389	1.19033
Calamovilfa longifolia	broad-leaved		2.13668	0.245513		2.35887	1.1038
Coreopsis palmata	broad-leaved		2.18046	0.0681859		1.85297	1.0607
Corylus americanus	broad-leaved		2.02228	0.303196		2.17085	1.00432
Desmodium canadense	broad-leaved	0.387292	1.80134	0.369216		2.28144	1.20412
Koeleria cristata	broad-leaved	0.49232	2.13668	0.201397		2.27326	1.25527
Lespedeza capitata	broad-leaved	0.194495	2.00877	0.324282		2.17307	1.18752
Liatris aspera	broad-leaved		2.10791	0.212188		2.08522	1.04532
Lupinus perennis	broad-leaved	-0.0252297	1.81248	0.552668		2.50767	1.31806
Panicum capillare	broad-leaved		1.82102	0.25042		2.32199
Panicum virgatum	broad-leaved		1.98716	0.206826		2.5139	1.06446
Penstemon grandiflorus	broad-leaved		1.97881	0.324282		2.3753	1.20412
Petalostemum purpureum	broad-leaved		2.12494	0.385606		2.43854
Petalostemum villosum	broad-leaved		2.04576	0.421604		2.43569	1.24551
Poa pratensis	broad-leaved	0.479258	2.00436	0.220108		2.47851	1.2833
Potentilla arguta	broad-leaved		1.97881	0.276462		2.2307	1.11727
Quercus macrocarpa	broad-leaved		1.97469	0.372912		2.2267	1.24797
Rudbeckia serotina	broad-leaved	0.188061	1.85387	0.330414		2.45576	1.17319
Schizachyrium scoparium	broad-leaved	0.37902	1.82102	0.0170333		2.42449	1.08636
Solidago nemoralis	broad-leaved		2.08619	0.198657		2.14681	1.16435
Solidago rigida	broad-leaved	0.479258	2.0655	0.103804		2.10768	1.11394
Sorghastrum nutans	broad-leaved	0.291405	1.98297	0.143015		2.49125	1.1038
Stipa spartea	broad-leaved		2.14874	0.257679		2.39657	1.03743
Adenanthos cygnorum	conifer	1.60163	2.36654	-0.103474		1.81923	0.639645
Andersonia heterophylla	conifer	1.03342	2.41255	-0.0268721		1.55348	1.08072
Astroloma xerophyllum	broad-leaved	0.936514	2.34858	-0.00877392		1.69143	0.855397
Banksia attenuata	broad-leaved	1.47363	2.45381	-0.0899095		1.99627	0.801692
Banksia menziesii	broad-leaved	1.58024	2.509	-0.0958256		1.79554	0.74907
Bossiaea eriocarpa	broad-leaved	1.21272	2.30452	0.276002		1.96499	0.963357
Calytrix flavescens	conifer	1.43902	2.3782	0.0111474		1.72205	0.884768
Conostephium pendulum	broad-leaved	1.43329	2.3349	-0.0400052		1.6999	0.921729
Eremaea pauciflora	conifer	1.14737	2.29864	0.0633334		1.77522	0.95548
Hibbertia huegelii	broad-leaved	1.16909	2.26193	0.0425755		1.87368	0.768695
Hibbertia subvaginata	broad-leaved	1.23452	2.39087	0.120245		1.88597	0.871836
Jacksonia floribunda	broad-leaved	1.52166	2.49381	0.205475		1.82319	0.924365
Leucopogon conostephioides	broad-leaved	1.14737	2.19595	0.0441476		1.65203	1.04496
Lyginia barbata	conifer	1.65896	2.8303	-0.146302		1.50474	0.599396
Macrozamia riedlei	broad-leaved	2.02366	2.46294	0.237795		1.57993	0.520669
Melaleuca acerosa	conifer	1.39305	2.52185	-0.0705811		1.71052	0.908402
Nuytsia floribunda	broad-leaved	1.45393	2.6621	-0.118615		1.51117	0.688054
Patersonia occidentalis	broad-leaved	1.45939	2.57889	-0.0639892		1.66029	0.69697
Persoonia saccata	conifer	1.47188	2.66492	-0.14813		1.65319	0.724622
Petrophile linearis	broad-leaved	1.61951	2.7361	-0.20621		1.61233	0.793729
Regelia ciliata	broad-leaved	1.27508	2.18837	0.0523091		1.93332	0.979256
Scholtzia involucrata	broad-leaved	1.37365	2.24919	0.115278		1.89787	1.00437
Stirlingia latifolia	broad-leaved	1.45939	2.46303	-0.0329203		1.78676	0.855979
Verticordia nitens	conifer	1.26387	2.52053	0.0503798		1.75996	0.78421
Xanthorrhoea preissii	conifer	1.38021	2.87149	-0.0979971		1.39498	0.494366
Anigozanthos humilis	broad-leaved	0.597695	1.76096	0.549739		2.55234
Drosera sp	broad-leaved	0.597695	1.69597	0.173478		1.99196
Gladiolus caryophyllaceus	broad-leaved	0.597695	1.94054	0.279211		2.27567
Pterostylis sp	broad-leaved	0.597695	1.57234	0.363424		2.18291
Stylidium sp	broad-leaved	0.597695	2.05052	0.262214		1.97741
Cistus monspeliensis	broad-leaved		2.1813	0.485119
Olea europaea	broad-leaved		2.29314	0.250361
Heteromeles arbutifolia	broad-leaved		2.2852	-0.165261
Rhamnus californica	broad-leaved		1.97146	0.126781
Arbutus menziesii	broad-leaved		2.15679	0.0838608
Drimys winteri	broad-leaved		2.16409	-0.0574959
Embothrium coccineum	broad-leaved		2.10704	0.0780942
Nothofagus betuloides	broad-leaved		2.17731	0.106395
Artemisia tridentata	broad-leaved		2.11769	0.203353
Larrea tridentata	broad-leaved		2.08425	0.379278
Cornus florida	broad-leaved		1.63518	0.17975
Liquidambar styraciflua	broad-leaved		1.854	0.161741
Liriodendron tulipifera	broad-leaved		1.55084	0.205418
Platanus occidentalis	broad-leaved		1.63306	0.302243
Acer rubrum	broad-leaved		1.64662	0.298321
Betula papyrifera	broad-leaved		1.92702	0.278732
Populus tremuloides	broad-leaved		1.90995	0.270439
Quercus rubra	broad-leaved		1.91734	0.313295
Cassiope tetragona	broad-leaved		2.04348	0.243219
Arctostaphylos uva-ursi	broad-leaved		2.50307	-0.154902
Cistus albidus	broad-leaved		2.26761	0.0530784
Cistus monspeliensis	broad-leaved		2.37851	0.113943
Cistus salvifolius	broad-leaved		1.97881	0.220108
Juniperus communis	conifer		2.17653	-0.142668
Olea europaea	broad-leaved		2.29757	0.193125
Pistacia lentiscus	broad-leaved		2.33536	0.404834
Quercus coccifera	broad-leaved		2.21875	0.155336
Arbutus unedo	broad-leaved		2.18863	0.00432137
Ceratonia siliqua	broad-leaved		2.30016	0.117271
Crataegus monogyna	broad-leaved		1.97347	0.09691
Ficus carica	broad-leaved		2.06073	0.278754
Fraxinus angustifolia	broad-leaved		1.87419	0.32838
Myrtus communis	broad-leaved		1.98338	0.176091
Nerium oleander	broad-leaved		2.25861	0.143015
Populus alba	broad-leaved		1.93096	0.220108
Celtis africana	broad-leaved			0.39794
Chaetachme aristata	broad-leaved			0.463893
Piper aequale	broad-leaved	1.36919	1.56229	0.445189		1.85733
Piper amalago	broad-leaved	1.43648	1.55991	0.376785		1.86923
Piper auritum	broad-leaved	0.624626	1.44871	0.574471		2.53782
Piper hispidum	broad-leaved	1.1348	1.48144	0.451687		2.12057
Piper lapathifolium	broad-leaved	1.23233	1.49554	0.43637		1.98677
Piper peltatum	broad-leaved	0.411216	1.36173	0.371068
Piper umbellatum	broad-leaved	0.548161	1.52114	0.440802		1.94448
Carpinus caroliniana	broad-leaved	0.886491	1.64397	0.361728
Clethra mexicana	broad-leaved	1.055	1.98928	0.146128
Liquidambar styraciflua	broad-leaved	0.857332	1.67572	0
Quercus xalapensis	broad-leaved	0.980003	1.84466	0.255273
Cinnamomum barbeyanum	broad-leaved	1.36361	1.90309	0.20412
Hedyosnium maxicanum	broad-leaved	0.851258	1.66655	0.322219
Magnolia schiedeana	broad-leaved	1.5611	1.9914	0.322219
Oreopanax xalapensis	broad-leaved	1.28103	2.04096	0.278754
Turpinia insignis	broad-leaved	1.17026	1.88606	0.190332
Acacia floribunda	broad-leaved	1.12625	2.09864	0.363003	-1.24413	2.02666	1.02563
Allocasuarina sp	broad-leaved		2.26475	0.120574	-1.33724	1.80443	0.887342
Astrotricha floccosa	broad-leaved	0.791952	1.91532	0.200793	-1.14874	2.17677	0.948741
Correa reflexa	broad-leaved	1.06681	1.85138	0.0991548	-1.3279	1.84721	0.664552
Dodonaea triquetra	broad-leaved	0.906701	1.97619	0.27897	-1.10237	2.32041	0.998091
Eucalyptus paniculata	broad-leaved	1.11847	2.07813	0.0348805	-1.31876	1.87681	0.788196
Eucalyptus umbra	broad-leaved	1.3932	2.31346	-0.0401035	-1.40894	1.60915	0.798116
Gompholobium latifolium	broad-leaved	1.42216	1.97788	0.233479	-1.50864
Lasiopetalum ferrugineum	broad-leaved	1.37856	2.08347	0.0636905	-1.52288	1.88483	0.625199
Leptospermum polygalifolium	broad-leaved	0.866273	1.96265	0.115724	-1.34679	2.04961	1.15243
Lomatia silaifolia	broad-leaved	1.43607	2.14571	-0.208302	-1.49485	1.67335	0.906495
Macrozamia communis	broad-leaved		2.43143	0.128813	-1.27572	1.41397	0.601896
Persoonia linearis	broad-leaved	1.60866	2.15501	-0.115715	-1.30103	1.67142	0.579426
Pomaderris ferruginea	broad-leaved	1.05921	1.99444	0.108326	-1.38722	1.97031	0.75474
Pultenea daphnoides	broad-leaved	0.972922	1.9738	0.290328	-1.4437	1.97831	0.885866
Pultenea flexilis	broad-leaved	1.21858	1.95641	0.309472	-1.34679	2.07076	1.15228
Synoum glandulosum	broad-leaved	1.07043	1.96439	0.200523	-1.07572	1.86653	0.964861
Syncarpia glomulifera	broad-leaved	1.35961	2.17217	-0.00710633	-1.39794	1.7591	0.790237
Xylomelum pyriforme	broad-leaved	1.61496	2.18316	-0.0614731	-1.4318	1.79965	0.591016
Acacia suaveolens	broad-leaved	1.46847	2.34342	0.281119	-1.65758	1.6683	0.843504
Banksia marginata	broad-leaved	1.56093	2.23095	-0.0707744	-1.63827	2.008	0.684446
Boronia ledifolia	broad-leaved	1.28572	2.20249	0.0759495	-1.65758	1.73789	0.790788
Corymbia gummifera	broad-leaved	1.16377	2.2715	-0.0897317	-1.52288	1.76834	0.754364
Eriostemon australasius	broad-leaved	1.0824	2.16657	0.0785008	-1.4437	1.75598	0.837829
Eucalyptus haemostoma	broad-leaved	1.27002	2.30053	0.0185778	-1.46852	1.72703	0.781013
Gompholobium grandiflorum	broad-leaved	1.44714	2.11294	0.088565	-1.74473	1.63212	0.952279
Grevillea buxifolia	broad-leaved	1.17617	2.04082	-0.150039	-1.63827	1.77333	1.03468
Grevillea speciosa	broad-leaved	1.27214	2.18636	-0.0664747	-1.61979	1.70169	0.868356
Hakea dactyloides	broad-leaved	1.61672	2.40793	-0.271747	-1.74473	1.65346	0.590991
Hakea teretifolia	conifer	1.32114	2.52605	-0.286782	-1.67778	1.54309	0.614911
Hibbertia bracteata	broad-leaved	1.04152	2.04174	0.0172194	-1.56864	1.73161	0.866444
Lambertia formosa	broad-leaved	1.47306	2.34548	-0.21882	-1.63827	1.57046	0.564902
Leptospermum trinervium	broad-leaved	1.34583	2.10927	-0.0687567	-1.60206	1.56574	0.99903
Persoonia levis	broad-leaved	1.65771	2.26111	-0.2287	-1.61979	1.65987	0.402182
Phyllota phylicoides	broad-leaved	1.3517	2.07685	0.0934687	-1.74473	1.70542	1.03206
Pimelea linifolia	broad-leaved	1.10319	1.75544	0.171691	-1.27572	2.0265	1.2198
Acacia doratoxylon	broad-leaved	1.29504	2.34006	0.302231	-1.08092	1.82592	0.828076
Acacia oswaldii	broad-leaved	1.32191	2.42186	0.264411	-1.17393	1.61245	0.648019
Atriplex stipitata	broad-leaved	0.802014	1.92062	0.462184	-0.879426	2.35662	1.58716
Brachychiton populneus	broad-leaved	1.12016	2.11575	0.252819	-1.01773	1.88041	0.730727
Callitris glaucophylla	broad-leaved	1.49017	2.37221	0.0795249	-1.06048	1.4291	0.618446
Dodonaea viscosa angustissima	broad-leaved	0.898229	2.22524	0.26944	-0.946922	1.87884	1.3015
Dodonaea viscosa cuneata	broad-leaved	0.994467	2.0548	0.296216	-1.01323	1.97569	1.25913
Dodonaea viscosa spatulata	broad-leaved	1.01417	2.12041	0.297163	-0.939302	2.00917	1.18903
Eremophila glabra	broad-leaved	1.24493	2.21291	0.226664	-0.869666	1.9629	0.997862
Eremophila longifolia	broad-leaved	1.17923	2.42985	0.165532	-1
Eremophila mitchelli	broad-leaved	1.1526	2.25303	0.270034	-1.02687	1.7276	1.03723
Eucalyptus intertexta	broad-leaved	1.19787	2.25606	0.167834	-0.987163	1.90099	0.743615
Exocarpus apophyllum	conifer	1.53097	2.71954	0.0279454	-0.958607	0.943857
Geijera parviflora	broad-leaved	1.46977	2.27482	0.229907	-0.978811	1.74191	0.757236
Hakea tephrosperma	conifer	1.61074	2.70175	-0.136358	-1.52288	1.34628	0.38204
Helichrysum apiculatum	broad-leaved		1.58289	0.432969	-0.548214	2.41593	1.55245
Melaleuca uncinata	conifer	1.24331	2.44901	0.104996	-1.03621	1.71949	1.03256
Olearia pimelioides	broad-leaved	1.13902	2.07431	0.389549	-0.869666	1.69377	1.22079
Philotheca difformis	broad-leaved	1.28275	2.4387	0.170128	-1.16115	1.59133	1.12502
Pimelea microcephala	broad-leaved	0.876666	1.90505	0.488527	-0.712198	2.12296	1.42494
Senna artemisioides 1lft	conifer	1.28792	2.5427	0.298008	-1.10237	1.51011	1.15402
Senna artemisioides 3lft	conifer	1.31511	2.45069	0.23865	-1.07058	1.70083	1.08819
Solanum ferocissium	broad-leaved	0.810411	1.87634	0.514194	-0.886057	2.15654	1.41739
Spartothamnella puberula	broad-leaved	0.977122	1.96557	0.471768	-0.920819	2.08636	1.51792
Acacia colletioides	conifer	1.57479	2.55915	0.252012	-1.31876	1.40867	0.76087
Acacia havilandiorum	conifer	1.32338	2.61534	0.163213	-1.33724	1.48592	0.947576
Acacia willhelmiana	broad-leaved	1.08454	2.20505	0.2767	-1.13668	1.72226	1.06273
Bertya cunninghamii	broad-leaved	1.20681	2.22823	0.281516	-1.07058	1.61418	1.01421
Beyeria opaca	broad-leaved	1.16809	2.20242	0.236441	-1.12494	1.56216	0.968728
Bossiaea walkeri	broad-leaved	1.75404	2.50163	0.0845325	-1.42022	1.45521	0.825609
Brachychiton populneus	broad-leaved	1.12254	2.09574	0.189161	-1.08092	1.70389	0.668417
Callitris glaucophylla	broad-leaved			0.0335298	-1.24413
Cassinia laevis	broad-leaved	0.998154	2.11318	0.267472	-0.982967	1.69556	1.11083
Eremophila deserti	broad-leaved	1.46387	2.33837	0.202599	-1.05061	1.66618	0.807999
Eremophila glabra	broad-leaved	1.20108	2.1925	0.263307	-0.9914	1.8407	1.06004
Eucalyptus dumosa	broad-leaved	1.47465	2.4804	-0.0420975	-1.3098	1.58294	0.566407
Eucalyptus socialis	broad-leaved	1.45819	2.45489	0.085717	-1.21467	1.70947	0.682791
Eutaxia microphylla	broad-leaved	1.06513	1.94854	0.276381	-1.10791	1.95134	1.17399
Grevillea aneura	broad-leaved		2.16281	0.0934217	-1.07058	1.55842	1.01971
Melaleuca uncinata	conifer	1.19813	2.58088	0.0614993	-1.10791	1.55742	0.964157
Micromyrtus sessilis	broad-leaved		2.32415	0.178977	-1.14874	1.3805	0.832721
Olearia decurrens	broad-leaved	1.05361	2.19081	0.235147	-1.07058	1.89383	1.08729
Olearia pimelioides	broad-leaved	0.960453	2.01267	0.367362	-0.958607	1.81665	1.14423
Philotheca difformis	broad-leaved	1.43437	2.24936	0.138018	-1.20066	1.59213	0.993385
Santalum acuminatum	broad-leaved	1.23684	2.49422	-0.000582211	-1.19382	1.31399	0.586681
Triodia scabra	conifer		2.58628	-0.0555173	-1.26761	1.53653	0.913829
Abies alba	conifer	1.993	2.26861	0.235528	-0.8477	1.45724
Acer platanoides	broad-leaved	0.7782	1.66696	0.209515	-0.6899	1.91944
Acer pseudoplatanus	broad-leaved	0.7782	1.79105	0.342423	-0.5524	1.88897
Betula pendula	broad-leaved	0.6812	1.81869	0.278754	-0.6031	2.0937
Carpinus betulus	broad-leaved	0.7782	1.65978	0.271842	-0.5704	2.07218
Fagus sylvatica	broad-leaved	0.7782	1.65377	0.338456	-0.7111	2.16518
Larix decidua	conifer	0.7782	2.00273	0.257679	-0.5181	1.61524
Picea abies	conifer	2.0137	2.37141	0.075547	-0.763	1.467
Pinus nigra	conifer	1.659	2.51174	0.071882	-0.909	1.71322
Pinus sylvestris	conifer	1.4594	2.45134	0.120574	-0.8722	1.58772
Pseudotsuga menziesii	conifer	1.8116	2.14471	0.0334238	-0.7836	1.48313
Quercus robur	broad-leaved	0.7782	1.83891	0.269513	-0.5627	1.92993
Quercus rubra	broad-leaved	0.7782	1.83596	0.303196	-0.6556	2.07229
Tilia cordata	broad-leaved	0.6812	1.66214	0.271842	-0.5698	1.9235
Betula ermanii	broad-leaved		1.67778	0.40654
Betula ermanii	broad-leaved		1.80967	0.255273
Anacardium excelsum	broad-leaved		2.011			1.92451
Cecropia longipes	broad-leaved		2.09583			1.9976
Didymopanax morototoni	broad-leaved		2.13966			2.02171
Ficus obtusifolia	broad-leaved		1.99396			2.14592
Luehea seemannii	broad-leaved		1.88639			2.13189
Pseudobombax septenatum	broad-leaved		2.10568			2.01159
Leucadendron lanigerum	broad-leaved		2.35641	-0.349855	-1.48244
Leucadendron pubescens (m&f)	broad-leaved		2.29019	-0.234013	-1.32515
Protea bracteolaris	conifer		2.46233	0.0136695	-1.47554
Protea laurifolia	broad-leaved		2.5534	0.0189773	-1.60203
Protea nitida	broad-leaved		2.53071	-0.327113	-1.41619
Leucadendron salignum (m&f)	broad-leaved		2.34684	-0.138745	-1.56911
Protea burchellii	broad-leaved		2.47828	-0.0647595	-1.41228
Protea laurifolia	broad-leaved		2.40637	-0.167709	-1.20273
Protea repens	broad-leaved		2.47114	-0.154884	-1.47355
Aulax umbellata	broad-leaved		2.3019	-0.142238	-1.32847
Leucadendron arcuatum (m&f)	broad-leaved		2.53643	-0.353938	-1.67922
Leucadendron salignum (m&f)	broad-leaved		2.3985	-0.273993	-1.52685
Protea laurifolia	broad-leaved		2.57148	-0.263791	-1.78368
Protea repens	broad-leaved		2.55871	-0.392318	-1.43529
Leucadendron brunoides	broad-leaved		2.63739	-0.232236	-1.22428
Leucadendron pubescens (m&f)	broad-leaved		2.46049	-0.266966	-1.50606
Protea glabra	broad-leaved		2.71941	-0.182534	-1.28503
Protea laurifolia	broad-leaved		2.65312	-0.249124	-1.67233
Leucadendron pubescens (m&f)	broad-leaved		2.26322	-0.284412	-1.47829
Leucadendron salignum (m&f)	broad-leaved		2.34439	-0.194338	-1.54932
Paranomus bracteolaris	conifer		2.46233	-0.0767503	-1.43364
Protea nitida	broad-leaved		2.41162	-0.128326	-1.29946
Diastella divaricata	broad-leaved		2.0976	0.0239151	-1.4366
Leucadendron laureolum	broad-leaved		2.34341	-0.310462	-1.65803
Leucadendron salignum (m&f)	broad-leaved		2.36661	-0.361454	-1.50695
Leucospermum conocarpodendron	broad-leaved		2.37328	-0.186433	-1.51044
Leucospermum hypophyllocarpodendron	broad-leaved		2.38184	-0.291066	-1.51793
Mimetes fibrifolium	broad-leaved		2.20925	-0.160278	-1.58263
Protea speciosa	broad-leaved		2.66567	-0.475876	-1.67347
Serruria hirsuta	conifer		2.28956	-0.143571	-1.57424
Leucadendron foedum (m&f)	broad-leaved		2.41142	-0.154174	-0.998932
Protea repens	broad-leaved		2.48728	-0.0660012	-1.07854
Serruria fucifolia	conifer		2.40904	0.164692	-1.27398
Leucadendron salignum (m&f)	broad-leaved		2.3447	-0.233451	-1.66595
Leucospermum conocarpodendron	broad-leaved		2.31931	-0.145356	-1.34936
Protea nerifolia	broad-leaved		2.41581	-0.133501	-1.53939
Protea nitida	broad-leaved		2.42991	-0.0323648	-1.53931
Serruria sp	conifer		2.28022	-0.0574236	-1.36989
Leucadendron salignum (m&f)	broad-leaved		2.36683	-0.174965	-1.43267
Protea laurifolia	broad-leaved		2.4603	0.174643	-1.32764
Protea neriifolia	broad-leaved		2.4183	-0.132865	-1.29416
Protea repens	broad-leaved		2.49927	-0.123461	-1.35479
Aulax umbellata	broad-leaved		2.27439	-0.0499714	-1.50069
Leucadendron conifesula	broad-leaved		2.38417	-0.106069	-1.39601
Leucadendron salignum (m&f)	broad-leaved		2.34347	-0.140468	-1.31827
Mimetes cucullatus	broad-leaved		2.30125	-0.318532	-1.53939
Protea susannae	broad-leaved		2.48416	-0.0897617	-1.44434
Serruria nervosa	broad-leaved		2.37803	-0.0521779	-1.39343
Aulax umbellata (m&f)	broad-leaved		2.34462	-0.109948	-1.66045
Leucadendron xanthoconus (m&f)	broad-leaved		1.93595	-0.188461	-1.65006
Leucospermum cordifolium	broad-leaved		2.40824	-0.198348	-1.76979
Mimetes cucullatus	broad-leaved		2.36248	-0.294658	-1.84195
Protea cordata	broad-leaved		2.49052	-0.180374	-1.83102
Protea neriifolia	broad-leaved		2.43965	-0.230824	-1.95713
Serruria fasciflora	conifer		2.40837	-0.0849108	-1.80179
Leucadendron laureolum	broad-leaved		2.37457	-0.0836177	-1.17919
Leucadendron xanthoconus (m&f)	broad-leaved		2.14891	-0.101518	-1.11429
Leucospermum cordifolium	broad-leaved		2.39829	-0.142046	-1.39471
Protea compacta	broad-leaved		2.447	-0.232117	-1.24619
Protea neriifolia	broad-leaved		2.45697	-0.0063133	-1.16287
Aulax umbellata (m&f)	broad-leaved		2.27277	-0.0846023	-1.57596
Leucadendron salignum (m&f)	broad-leaved		2.18185	-0.206973	-1.59239
Protea cordata	broad-leaved		2.45347	-0.193583	-1.81309
Protea neriifolia	broad-leaved		2.52595	-0.0696566	-1.68507
Protea repens	broad-leaved		2.51548	-0.25655	-1.62652
Hakea amplexicaulis	broad-leaved		2.31851	-0.444906	-1.88606
Hakea cristata	broad-leaved		2.5057	-0.211832	-1.4437
Hakea cyclocarpa	broad-leaved		2.58297	-0.380907	-1.79588
Hakea erinacea	conifer		2.38171	-0.334419	-1.22915
Hakea incrassata	broad-leaved		2.59394	-0.188425	-1.72125
Hakea lissocarpha	conifer		2.50054	-0.360514	-1.60206
Hakea myrtoides	broad-leaved		2.20962	-0.259637	-1.55284
Hakea petiolaris	broad-leaved		2.45645	-0.143271	-1.56864
Hakea ruscifolia	broad-leaved		2.33556	-0.268411	-1.56864
Hakea stenocarpa	broad-leaved		2.2602	-0.21254	-1.61979
Hakea trifurcata (needle)	conifer		2.55001
Hakea undulata	broad-leaved		2.29553	-0.110138	-1.52288
Hakea anadenia	broad-leaved		2.39944	-0.188425	-1.38722
Hakea auriculata	broad-leaved		2.69222	-0.267606	-1.82391
Hakea conchifolia	broad-leaved		2.36371	-0.226214	-1.74473
Hakea costata	broad-leaved		2.2511	-0.476254	-1.60206
Hakea eneabba	broad-leaved		2.60461	-0.364516	-1.88606
Hakea flabellifolia	broad-leaved		2.7411	-0.304518	-1.92082
Hakea incrassata	broad-leaved		2.61618	-0.188425	-1.72125
Hakea longiflora	conifer		2.56545	-0.552842	-2
Hakea marginata	broad-leaved		2.35523	-0.267606	-1.79588
Hakea megalosperma	broad-leaved		2.42455	-0.422508	-2
Hakea neurophylla	broad-leaved		2.52165	-0.267606	-1.82391
Hakea prostrata	broad-leaved		2.5411	-0.109579	-1.67778
Hakea psilorryncha	conifer		2.91107	-0.462181	-2
Hakea spathulata	broad-leaved		2.5045	-0.304518	-1.72125
Hakea trifurcata (needle)	conifer		2.70256
Hakea adnata	conifer		2.68029	-0.375718	-1.63827
Hakea bicornata	conifer		2.84703	-0.354578	-1.50864
Hakea pandicarpa pandicarpa	broad-leaved		2.73209	-0.251037	-1.55284
Hakea scoparia trycherica	conifer		2.7987	-0.211125	-1.67778
Hakea acuminata	broad-leaved		2.61353	-0.343902	-1.92082
Hakea cinerea	broad-leaved		2.73452	-0.195861	-1.49485
Hakea hookeriana	broad-leaved		2.73045	-0.304518	-1.52288
Hakea ilicifolia	broad-leaved		2.76013	-0.519993	-1.55284
Hakea lasiocarpha	broad-leaved		2.67025	-0.333482	-1.52288
Hakea nitida	broad-leaved		2.56854	-0.313364	-1.67778
Hakea obtusa	broad-leaved		2.36334	-0.127844	-1.63827
Hakea verrucosa	conifer		2.7177	-0.44855	-1.65758
Hakea victoria	broad-leaved		2.67791	-0.323306	-2
Hakea bucculenta	broad-leaved		2.65034	-0.0746879	-1.61979
Hakea orthorryncha filiformis	conifer		2.78107	-0.44855	-1.72125
Hakea orthorryncha orthorryncha	broad-leaved		2.7965	-0.195861	-1.61979
Hakea pycnoneura	broad-leaved		2.53173	-0.387216	-1.63827
Hakea stenophylla	broad-leaved		2.61348	-0.0584886	-1.45593
Hakea commutata	conifer		2.79871	-0.28567	-1.55284
Hakea cygna cygna	broad-leaved		2.66126	-0.364516	-1.67778
Hakea cygna needlei	conifer		2.71212	-0.0172766	-1.74473
Hakea horrida	broad-leaved		2.64374	-0.399027	-1.55284
Hakea kippistiana	conifer		2.7963	-0.21467	-1.67778
Hakea newbeyana	conifer		2.9029	-0.420216	-1.82391
Hakea obliqua parviflora	conifer		2.92632	-0.552842	-1.82391
Hakea strumosa	conifer		2.89842	-0.504456	-1.65758
Hakea subsulcata	conifer		2.59585	-0.134304	-1.4437
Hakea erecta	broad-leaved		2.58347	-0.605548	-1.60206
Hakea francisiana	broad-leaved		2.56065	-0.348722	-1.5376
Hakea invaginata	conifer		2.84836	-0.294992	-1.65758
Hakea minyma	broad-leaved		2.55628	-0.069051	-1.60206
Hakea multilineata	broad-leaved		2.51911	-0.489455	-1.61979
Hakea drupacea	broad-leaved		2.61727	-0.354578	-1.67778
Hakea elliptica	broad-leaved		2.28433	-0.195861	-1.40894
Hakea ferruginea	broad-leaved		2.23423	-0.411168	-1.69897
Hakea lasiantha	broad-leaved		2.37743	-0.329754	-2.04576
Hakea laurina	broad-leaved		2.44952	-0.181774	-1.4318
Hakea preissii	conifer		2.95578	-0.343902	-1.38722
Hakea ruscifolia	broad-leaved		2.34954	-0.268411	-1.56864
Hakea sulcata	conifer		2.82345	-0.354578	-1.61979
Hakea tuberculata	broad-leaved		2.37298	-0.318759	-1.63827
Hakea ambigua	broad-leaved		2.39714	-0.218963	-1.63827
Hakea baxteri	broad-leaved		2.77825	-0.411168	-1.82391
Hakea ceratophylla	broad-leaved		2.83096	-0.393619	-1.88606
Hakea corymbosa	broad-leaved		2.86467	-0.434152	-1.74473
Hakea cucullata	broad-leaved		2.51047	-0.181774	-1.69897
Hakea denticulata	broad-leaved		2.56274	-0.317855	-1.76955
Hakea lehmanniana	broad-leaved		2.54731	-0.474955	-1.79588
Hakea pandicarpa crassifolia	broad-leaved		2.8552	-0.425969	-1.79588
Hakea pritzelii	broad-leaved		2.54613	-0.167491	-1.60206
Hakea prostrata	broad-leaved		2.44211	-0.357535	-1.24413
Hakea trifurcata (needle)	conifer		2.77479
Hakea varia	broad-leaved		2.62544	-0.471083	-1.88606
Hakea amplexicaulis	broad-leaved		2.39065	-0.444906	-1.88606
Hakea falcata	broad-leaved		2.18989
Hakea florida	broad-leaved		2.51755	-0.30103	-1.74473
Hakea linearis	broad-leaved		2.55174	-0.226214	-1.67778
Hakea oleifolia	broad-leaved		2.50078	-0.291579	-1.58503
Hakea prostrata	broad-leaved		2.62254	-0.357535	-1.24413
Hakea brownii	broad-leaved		2.78554	-0.489455	-2
Hakea candolleana	broad-leaved		2.6863	-0.251037	-1.49485
Hakea circumalata	conifer		2.50712
Hakea cygna cygna	broad-leaved		2.68214	-0.364516	-1.67778
Hakea gilbertii	conifer		2.66778	-0.476254	-1.85387
Hakea obliqua parviflora	conifer		2.77506	-0.552842	-1.82391
Hakea platysperma	conifer		2.93941	-0.476254	-1.85387
Hakea polyanthema	conifer		2.71082	-0.354578	-1.92082
Hakea recurva arida	conifer		2.9643	-0.218963	-1.61979
Hakea recurva recurva	conifer		3.17884	-0.276544	-1.65758
Hakea scoparia scoparia	conifer		2.77064	-0.364516	-1.76955
Alnus incana	broad-leaved	0.556303	1.66276	0.503791
Andromeda polifolia	broad-leaved		2.19061			1.77525
Betula nana	broad-leaved	0.556303	1.88592	0.318585	-0.647817	2.21405
Betula papyrifera	broad-leaved	0.556303	1.74036	0.414973
Cassiope tetragona	broad-leaved	1.77815	2.39794	0.0791812		1.48996
Dryas octopetala	broad-leaved	1.12057	1.86923	0.445604
Empetrum nigrum	broad-leaved	1.77815	2.24555	0.0413927		1.60853
Eriophorum angustifolium	broad-leaved	0.556303	2.10702	0.20412		1.94498
Ledum groenlandicum	broad-leaved		2.10037	0.0791812
Picea glauca	conifer	1.77815	2.50515	0.0791812
Picea mariana	conifer	2.38021	2.59106	-0.0457575
Polygonum bistorta	broad-leaved	0.556303	1.99241	0.37429	-0.756962	2.34439
Populus balsamifera	broad-leaved	0.556303	1.98227	0.278754
Populus tremuloides	broad-leaved	0.556303	1.88081	0.342423
Salix glauca	broad-leaved	0.556303	1.92942	0.342423
Salix reticulata	broad-leaved	0.556303	1.95617			2.12905
Vaccinium ulignosum	broad-leaved	0.556303	1.91019	0.372912		2.14644
Vaccinium vitis-idaea	broad-leaved	1.5563	2.25073	-0.00436481	-1	1.62325
Beureria cumanensis	broad-leaved	0.90309	2.05081	0.229682	-0.89279
Bulnesia arborea	broad-leaved	1.04139	1.95975	0.294246	-0.866461
Caesalpinia granadillo	broad-leaved	0.954243	2.13118	0.256718	-0.850781
Capparis linearis	broad-leaved	1.07918	2.6855	0.100371	-1.16115
Capparis odoratissima	broad-leaved	1.07918	2.44057	0.0599419	-1.09691
Capparis pachaca	broad-leaved	1.07918	2.35105	0.130334	-1.14267
Cochlospermum vitifolium	broad-leaved	0.778151	1.72986	0.35679	-0.669586
Jacquinia revoluta	broad-leaved	1.07918	2.39664	-0.011441	-1.20761
Pithecellobium carobobense	broad-leaved	0.778151	1.92698	0.357744	-0.809668
Tabebuia billbergiana	broad-leaved	0.778151	1.7191	0.362671	-0.737549
Aristotelia fruiticosa	broad-leaved		2.07195	0.267417	-0.846317
Brachyglottis revolutus	broad-leaved		2.51881	0.0385692	-0.913625
Cassinia vauvilliersii	broad-leaved		2.29188	0.0366323	-1.07251
Coprosma alpina	broad-leaved		2.29256	-0.0456148	-1.0426
Coprosma cheesemanii	broad-leaved		2.13057	0.20141	-0.857035
Coprosma ciliata	broad-leaved		2.12994	0.22359	-0.765682
Coprosma parviflora	broad-leaved		2.08014	0.280836	-0.765389
Coprosma rugosa	broad-leaved		2.1677	0.250976	-0.812635
Coprosma serrulata	broad-leaved		2.37959	-0.0112533	-0.996817
Dracophyllum uniflorum	broad-leaved		2.35372	-0.0609091	-1.15012
Draracophyllum prostratum	broad-leaved		2.13523	-0.0554536	-1.14732
Gaultheria crassa	broad-leaved		2.2968	0.0239211	-1.12499
Halocarpus bidwillii	broad-leaved		2.19109	0.0490398	-1.07629
Hebe argentea	broad-leaved		2.33492	0.11514	-0.969029
Hebe cockayneana	broad-leaved		2.32257	0.0403168	-0.915732
Hebe hectorii	broad-leaved		2.63225	-0.217907	-1.23355
Hebe odora	broad-leaved		2.40215	-0.141862	-1.19684
Hebe pauciflora	broad-leaved		2.19832	0.106152	-0.909167
Hebe pauciramosa	broad-leaved		2.50968	-0.195578	-1.35381
Hebe subalpina	broad-leaved		2.33629	-0.0156213	-0.998652
Lepidothamnus laxifolius	broad-leaved		2.09035	0.00827463	-1.10137
Myrsine nummularia	broad-leaved		2.1057	0.0225827	-1.02967
Olearia moschata	broad-leaved		2.24079	0.192904	-0.885651
Olearia numularifolia	broad-leaved		2.34735	0.0302683	-0.952739
Olearia virgata	broad-leaved		2.22753	0.300313	-0.684111
Phyocladus alpinus	broad-leaved		2.55004	-0.0695101	-1.06416
Podocarpus nivalis	broad-leaved		2.30917	0.00560505	-0.878259
Acer pensylvanicum	broad-leaved		1.59007
Acer rubrum	broad-leaved		1.88941	0.217484			0.931947
Betula sp	broad-leaved		1.76955
Carya glabra	broad-leaved		1.92445	0.40654			1.01423
Cornus florida	broad-leaved		1.82974	0.240549			1.0425
Fraxinus sp	broad-leaved		1.90309	0.283301			1.06596
Liriodendron tulipifera	broad-leaved		1.8729	0.32838			1.09061
Magnolia fraseri	broad-leaved		1.64397	0.359835			1.00247
Nyssa sylvatica	broad-leaved		1.73755	0.264818			1.04003
Oxydendron arboreum	broad-leaved		1.5817	0.269513			1.09811
Platanus occidentalis	broad-leaved		1.83863	0.31597			0.888608
Quercus alba	broad-leaved		1.98716	0.342423			1.04916
Quercus coccinea	broad-leaved		2.02228
Quercus prinus	broad-leaved		2.05061	0.404834			1.07723
Quercus rubra	broad-leaved		1.98297	0.332438			0.920907
Rhododendron maximum	broad-leaved		2.07058
Robinia pseudoacacia	broad-leaved		1.87943	0.501059			1.05371
Tilia americana	broad-leaved		1.82391	0.459392			1.02033

## Sheet: Data description
Data from Wright et al "GLOPNET" leaf economics dataset
Units (prior to log10 transformation, where indicated): LL mo; LMA g m-2; Nmass, Pmass %; Narea, Parea g m-2; Amass, Rdmass nmol g-1s-1; Aarea, Rdarea micromol m-2s-1
